# Supplementary material
Source: PubMed Central journal article supplement (PMC5494538)

# Diazo compounds for the bioreversible esterification of proteins

Nicholas A. McGrath, Kristen A. Andersen, Amy K. F. Davis, Jo E. Lomax, and Ronald T. Raines\*

## Table of Contents

|                                                                                              |     |
|----------------------------------------------------------------------------------------------|-----|
| 1. General Methods                                                                           | S1  |
| 2. Experimental Procedures and Characterization Data                                         | S2  |
| A. Esterification Reactions in Acetonitrile                                                  | S2  |
| I. Diazoacetamide Reactions                                                                  | S2  |
| II. Diazofluorene Reactions                                                                  | S4  |
| B. Esterification Screening in Acetonitrile/Buffer Solution                                  | S6  |
| C. Thioester versus Thionoester Formation with Thioacetic Acid                               | S7  |
| 3. RNase A-Esterification Experiments                                                        | S8  |
| 4. Trypsin-Digestion and MS/MS Experiments to Identify Esterified Carboxyl Groups in RNase A | S8  |
| 5. FLAG–RNase A-Esterification Experiments                                                   | S9  |
| 6. His <sub>6</sub> –RFP-Esterification Experiments                                          | S9  |
| 7. MALDI–TOF Mass Spectrometry Data for RNase A-Esterification Experiments                   | S11 |
| 8. MS/MS Data for Trypsin-Digestion Experiments                                              | S12 |
| 9. MALDI–TOF Mass Spectrometry Data for FLAG–RNase A-Esterification Experiments              | S21 |
| 10. Ribonucleolytic Activity Assay Data                                                      | S23 |
| 11. MALDI–TOF Mass Spectrometry Data for His <sub>6</sub> –RFP-Esterification Experiments    | S24 |
| 12. References                                                                               | S24 |
| 13. NMR Spectra                                                                              | S25 |

## 1. General Methods

Reagent chemicals were obtained from commercial sources and used without further purification. All glassware was flame-dried under high vacuum, and reactions were performed under N<sub>2</sub>(g) unless indicated otherwise. Dichloromethane, diethyl ether, tetrahydrofuran, and toluene were dried over a column of alumina. Dimethylformamide and triethylamine were dried over alumina and purified further by passage through an isocyanate scrubbing column. Flash chromatography was performed with columns of 40–63 Å silica gel, 230–400 mesh from Silicycle (Québec City, Canada). Thin-layer chromatography (TLC) was performed on plates of EMD 250-µm silica 60-F<sub>254</sub>.

The phrase “concentrated under reduced pressure” refers to the removal of solvents and other volatile materials using a rotary evaporator at water aspirator pressure (<20 torr) while maintaining the water-bath temperature below 40 °C. Residual solvent was removed from samples at high vacuum (<0.1 torr). The term “high vacuum” refers to vacuum achieved by mechanical belt-drive oil pump.

All NMR spectra were acquired at ambient temperature with a DMX-400 Avance, Avance III 500i with cryoprobe, or Avance III 500ii with cryoprobe spectrometer from Bruker (Billerica, MA) at the National Magnetic Resonance Facility at Madison (NMRFAM), and were referenced to TMS or a residual protic solvent.

Electrospray ionization (ESI) mass spectrometry for small-molecule characterization was performed with a Micromass LCT at the Mass Spectrometry Facility in the Department of Chemistry at the University of Wisconsin–Madison. Matrix-assisted laser desorption ionization–time-of-flight (MALDI–TOF) mass spectrometry for protein characterization was performed with a Voyager DE-Pro instrument at the Biophysics Instrumentation Facility at the University of Wisconsin–Madison.

**Cell culture.** HeLa cells were obtained from ATCC (Manassas, VA). Cells were cultured in DMEM supplemented with FBS (10% v/v) and penicillin/streptomycin (1% w/v) at 37 °C in the presence of 5% CO<sub>2</sub>(g).

## 2. Experimental Procedures and Characterization Data

### A. Esterification Reactions in Acetonitrile

#### I. Diazobenzylacetamide Reactions

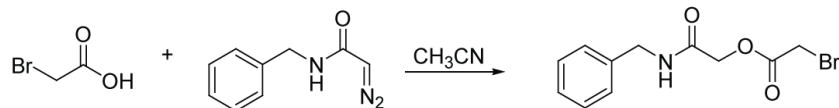

Diazobenzylacetamide (0.010 g, 0.057 mmol) was added to a solution of bromoacetic acid (0.008 g, 0.057 mmol) in anhydrous acetonitrile (0.57 mL), and the reaction mixture was stirred for 1 h, when the reaction was determined to be complete by thin-layer chromatography ( $R_f = 0.3$  in 50% EtOAc, 50% hexanes). The reaction mixture was concentrated under reduced pressure and purified by silica gel chromatography to give *N*-benzyl-acetamidobromoacetate (0.012 g, 74%).

**<sup>1</sup>H NMR (400 MHz, CDCl<sub>3</sub>)**  $\delta$  7.38–7.16 (m, 5H), 6.41 (bs, 1H), 4.70 (s, 2H), 4.50 (d,  $J = 5.9$  Hz, 2H), 3.87 (s, 2H). **<sup>13</sup>C NMR (126 MHz, CDCl<sub>3</sub>)**  $\delta$  166.3, 165.9, 137.5, 129.1, 129.0, 128.0, 78.0, 64.1, 43.5, 25.2. **HRMS (ESI)**  $m/z$  286.0074 [calc'd for C<sub>11</sub>H<sub>13</sub>BrNO<sub>3</sub> (M+H<sup>+</sup>) 286.0074].

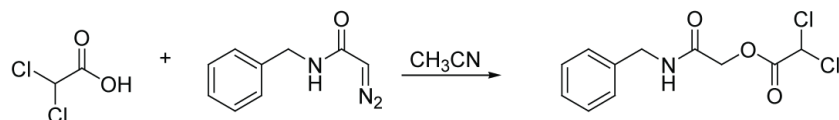

Diazobenzylacetamide (0.010 g, 0.057 mmol) was added to a solution of dichloroacetic acid (0.005 mL, 0.057 mmol) in anhydrous acetonitrile (0.57 mL), and the reaction mixture was stirred for 30 min, when the reaction was determined to be complete by thin-layer chromatography ( $R_f = 0.3$  in 30% EtOAc, 70% hexanes). The reaction mixture was concentrated under reduced pressure and purified by silica gel chromatography to give benzyl-acetamido-dichloroacetate (0.008 g, 51%).

**<sup>1</sup>H NMR (500 MHz, CDCl<sub>3</sub>)**  $\delta$  7.43–7.29 (m, 5H), 6.38 (bs, 1H), 6.05 (s, 1H), 4.83 (s, 2H), 4.56 (d,  $J = 5.8$  Hz, 2H). **<sup>13</sup>C NMR (126 MHz, CDCl<sub>3</sub>)**  $\delta$  165.5, 163.1, 137.3, 129.1, 128.1, 128.0, 64.9, 63.9, 43.6. **HRMS (ESI)**  $m/z$  293.0459 [calc'd for C<sub>11</sub>H<sub>13</sub>Cl<sub>2</sub>N<sub>2</sub>O<sub>3</sub> (M+NH<sub>4</sub><sup>+</sup>) 293.0455].

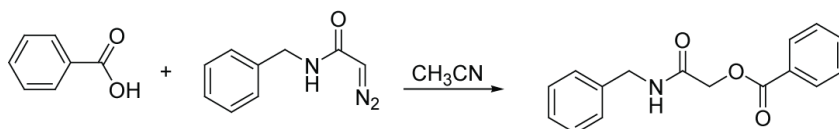

Diazobenzylacetamide (0.010 g, 0.057 mmol) was added to a solution of benzoic acid (0.007 g, 0.057 mmol) in anhydrous acetonitrile (0.57 mL), and the reaction mixture was stirred for 8 h, when the reaction was determined to be complete by thin-layer chromatography ( $R_f = 0.8$  in 80% EtOAc, 20% hexanes). The reaction mixture was concentrated under reduced pressure and purified by silica gel chromatography to give benzyl-acetamido-benzoate (0.012 g, 78%).

**<sup>1</sup>H NMR (400 MHz, CDCl<sub>3</sub>)**  $\delta$  8.02 (d,  $J = 7.6$  Hz, 2H), 7.59 (t,  $J = 7.3$  Hz, 1H), 7.45 (t,  $J = 7.6$  Hz, 2H), 7.39–7.21 (m, 5H), 6.42 (bs, 1H), 4.87 (s, 2H), 4.53 (d,  $J = 6.0$  Hz, 2H). **<sup>13</sup>C NMR (126 MHz, CDCl<sub>3</sub>)**  $\delta$  167.3, 165.4, 137.8, 134.0, 134.0, 130.0, 129.0, 128.9, 127.9, 127.9, 63.7, 43.3. **HRMS (ESI)**  $m/z$  270.1133 [calc'd for C<sub>16</sub>H<sub>16</sub>NO<sub>3</sub> (M+H<sup>+</sup>) 270.1125].

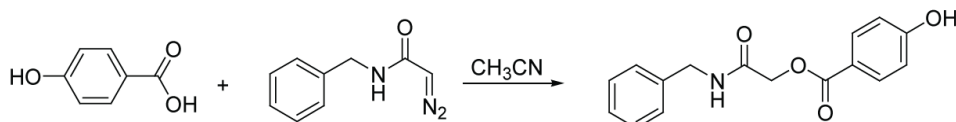

Diazobenzylacetamide (0.010 g, 0.057 mmol) was added to a solution of 4-hydroxybenzoic acid (0.008 g, 0.057 mmol) in anhydrous acetonitrile (0.57 mL), and the reaction mixture was stirred for 12 h, when the reaction was determined to be complete by thin-layer chromatography ( $R_f = 0.6$  in 75% EtOAc, 25% hexanes). The reaction mixture was concentrated under reduced pressure and purified by silica gel chromatography to give benzylacetamido-4-hydroxybenzoate (0.011 g, 61%).

$^1\text{H NMR}$  (700 MHz,  $\text{CDCl}_3$ )  $\delta$  7.98 (d,  $J = 8.7$  Hz, 2H), 7.40–7.35 (m, 2H), 7.36–7.31 (m, 3H), 6.90 (d,  $J = 8.7$  Hz, 2H), 6.45 (bs, 1H), 4.89 (s, 2H), 4.58 (d,  $J = 5.9$  Hz, 2H).  $^{13}\text{C NMR}$  (126 MHz,  $\text{CDCl}_3$ )  $\delta$  167.6, 165.0, 160.5, 137.8, 132.4, 129.0, 127.9, 127.9, 121.6, 115.7, 63.5, 43.3. **HRMS** (ESI)  $m/z$  286.1070 [calc'd for  $\text{C}_{16}\text{H}_{16}\text{NO}_4$  ( $\text{M}+\text{H}^+$ ) 286.1074].

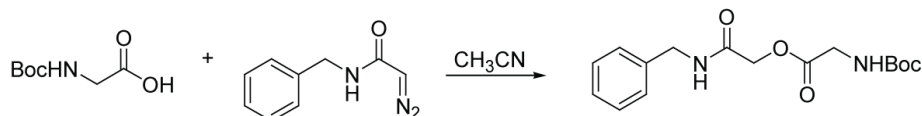

Diazobenzylacetamide (0.010 g, 0.057 mmol) was added to a solution of Boc-protected glycine (0.010 g, 0.057 mmol) in anhydrous acetonitrile (0.57 mL), and the reaction mixture was stirred for 3 h, when the reaction was determined to be complete by thin-layer chromatography ( $R_f = 0.7$  in 75% EtOAc, 25% hexanes). The reaction mixture was concentrated under reduced pressure and purified by silica gel chromatography to give benzylacetamido-Boc-protected glycine (0.015 g, 82%).

$^1\text{H NMR}$  (400 MHz,  $\text{CDCl}_3$ )  $\delta$  7.38–7.25 (m, 5H), 7.07 (bs, 1H), 5.10 (bs, 1H), 4.71 (s, 2H), 4.48 (d,  $J = 6.0$  Hz, 2H), 3.90 (d,  $J = 5.9$  Hz, 2H), 1.37 (s, 9H).  $^{13}\text{C NMR}$  (126 MHz,  $\text{CDCl}_3$ )  $\delta$  169.1, 166.8, 156.4, 137.8, 128.7, 127.8, 127.5, 80.8, 63.2, 43.1, 42.9, 28.2. **HRMS** (ESI)  $m/z$  340.1873 [calc'd for  $\text{C}_{16}\text{H}_{26}\text{N}_3\text{O}_5$  ( $\text{M}+\text{NH}_4^+$ ) 340.1867].

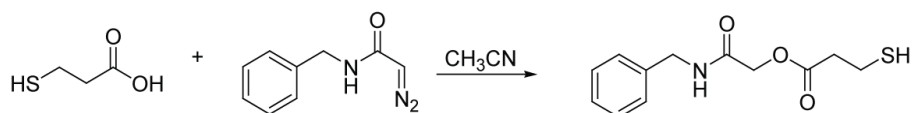

Diazobenzylacetamide (0.010 g, 0.057 mmol) was added to a solution of 3-mercaptopropanoic acid (0.005 mL, 0.057 mmol) in anhydrous acetonitrile (0.57 mL), and the reaction mixture was stirred for 12 h, when the reaction was determined to be complete by thin-layer chromatography ( $R_f = 0.6$  in 70% EtOAc, 30% hexanes). The reaction mixture was concentrated under reduced pressure and purified by silica gel chromatography to give benzylacetamido-3-mercaptopropanoate (0.011 g, 76%).

$^1\text{H NMR}$  (400 MHz,  $\text{CDCl}_3$ )  $\delta$  7.46–7.13 (m, 5H), 6.54 (bs, 1H), 4.69 (s, 2H), 4.50 (d,  $J = 5.7$  Hz, 2H), 2.82–2.77 (m, 2H), 2.76–2.71 (m, 2H), 1.59 (t,  $J = 8.1$  Hz, 1H).  $^{13}\text{C NMR}$  (126 MHz,  $\text{CDCl}_3$ )  $\delta$  170.5, 166.9, 137.7, 129.0, 128.1, 128.0, 63.4, 43.4, 38.3, 20.0. **HRMS** (ESI)  $m/z$  271.1115 [calc'd for  $\text{C}_{12}\text{H}_{19}\text{N}_2\text{O}_3\text{S}$  ( $\text{M}+\text{NH}_4^+$ ) 271.1111].

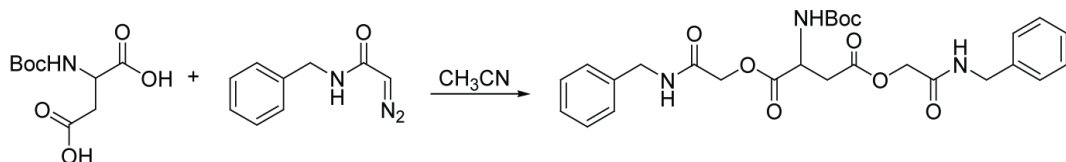

Diazobenzylacetamide (0.020 g, 0.114 mmol) was added to a solution of Boc-protected L-aspartic acid (0.013 g, 0.057 mmol) in anhydrous acetonitrile (0.57 mL), and the reaction mixture was stirred for 12 h, when the reaction was determined to be complete by thin-layer chromatography ( $R_f = 0.5$  in 80% EtOAc, 20% hexanes). The reaction mixture was concentrated under reduced pressure and purified by silica gel chromatography to give bis-benzylacetamido-Boc-protected aspartate (0.019 g, 63%).

$^1\text{H NMR}$  (400 MHz,  $\text{CDCl}_3$ )  $\delta$  7.38–7.20 (m, 10H), 7.04 (bs, 1H), 6.49 (bs, 1H), 5.53 (bs, 1H), 4.73–4.55 (m, 3H), 4.53–4.35 (m, 6H), 3.03 (dd,  $J = 16.9, 5.2$  Hz, 1H), 2.94 (dd,  $J = 16.9, 5.2$  Hz, 1H), 1.34 (s, 9H).  $^{13}\text{C NMR}$  (126

**MHz, CDCl<sub>3</sub>**)  $\delta$  170.3, 170.3, 166.5, 166.2, 155.7, 137.7, 137.5, 128.8, 128.6, 127.9, 127.8, 127.8, 127.5, 81.1, 63.8, 63.4, 50.3, 43.2, 43.1, 36.4, 28.2. **HRMS** (ESI)  $m/z$  545.2632 [calc'd for C<sub>27</sub>H<sub>37</sub>N<sub>4</sub>O<sub>8</sub> (M+NH<sub>4</sub><sup>+</sup>) 545.2606].

## II. Diazofluorene Reactions

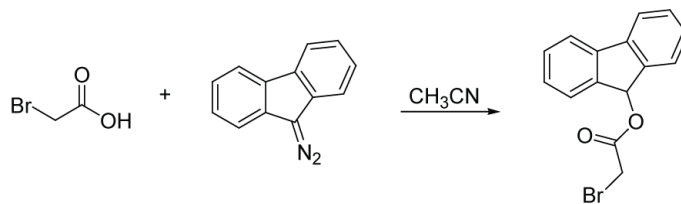

Diazofluorene (0.003 g, 0.016 mmol) was added to a solution of bromoacetic acid (0.002 g, 0.016 mmol) in anhydrous acetonitrile (0.16 mL), and the reaction mixture was stirred for 20 min, when the reaction was determined to be complete by thin-layer chromatography ( $R_f = 0.7$  in 30% EtOAc, 70% hexanes). The reaction mixture was concentrated under reduced pressure and purified by silica gel chromatography to give fluorenyl-bromoacetate (0.004 g, 94%).

**<sup>1</sup>H NMR (400 MHz, CDCl<sub>3</sub>)**  $\delta$  7.66 (d,  $J = 7.5$  Hz, 2H), 7.54 (d,  $J = 7.5$  Hz, 2H), 7.41 (t,  $J = 7.5$  Hz, 2H), 7.29 (t,  $J = 7.5$  Hz, 2H), 6.80 (s, 1H), 3.92 (s, 2H). **<sup>13</sup>C NMR (126 MHz, CDCl<sub>3</sub>)**  $\delta$  168.4, 141.3, 141.3, 130.1, 128.2, 126.2, 120.4, 26.1. [Fluorenyl alkyl CH overlaps with a chloroform peak]. **<sup>13</sup>C NMR (126 MHz, CD<sub>3</sub>OD)**  $\delta$  170.1, 142.9, 142.5, 131.0, 129.2, 127.1, 121.3, 77.9, 26.7. **HRMS** (EI)  $m/z$  301.9926 [calc'd for C<sub>15</sub>H<sub>11</sub>BrO<sub>2</sub> (M<sup>+</sup>) 301.9937].

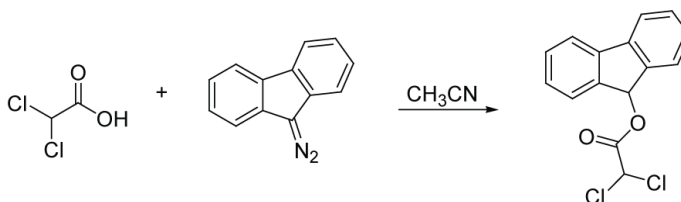

Diazofluorene (0.003 g, 0.016 mmol) was added to a solution of dichloroacetic acid (0.002 g, 0.016 mmol) in anhydrous acetonitrile (0.16 mL), and the reaction mixture was stirred for 1 min, when the reaction was determined to be complete by thin-layer chromatography ( $R_f = 0.7$  in 30% EtOAc, 70% hexanes). The reaction mixture was concentrated under reduced pressure and purified by silica gel chromatography to give fluorenyl-dichloroacetate (0.004 g, 91%).

**<sup>1</sup>H NMR (400 MHz, CDCl<sub>3</sub>)**  $\delta$  7.68 (d,  $J = 7.5$  Hz, 2H), 7.56 (d,  $J = 7.5$  Hz, 2H), 7.45 (t,  $J = 7.5$  Hz, 2H), 7.32 (t,  $J = 7.5$  Hz, 2H), 6.83 (s, 1H), 6.03 (s, 1H). **<sup>13</sup>C NMR (126 MHz, CDCl<sub>3</sub>)**  $\delta$  165.8, 141.4, 140.6, 130.3, 128.4, 126.2, 120.5, 78.1, 64.5. **HRMS** (EI)  $m/z$  292.0042 [calc'd for C<sub>15</sub>H<sub>10</sub>Cl<sub>2</sub>O<sub>2</sub> (M<sup>+</sup>) 292.0053].

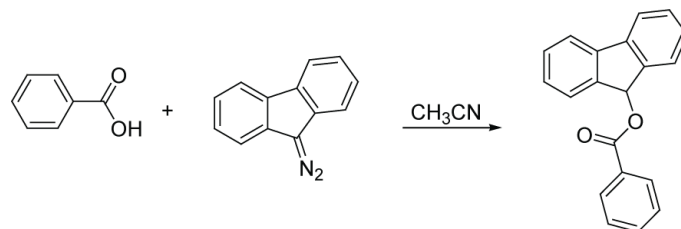

Diazofluorene (0.006 g, 0.031 mmol) was added to a solution of benzoic acid (0.004 g, 0.031 mmol) in anhydrous acetonitrile (0.31 mL), and the reaction mixture was stirred for 5 h, when the reaction was determined to be complete by thin-layer chromatography ( $R_f = 0.9$  in 30% EtOAc, 70% hexanes). The reaction mixture was concentrated under reduced pressure and purified by silica gel chromatography to give fluorenyl-benzoate (0.008 g, 90%).

**<sup>1</sup>H NMR (400 MHz, CDCl<sub>3</sub>)** δ 8.09 (d, *J* = 7.5 Hz, 2H), 7.71 (d, *J* = 7.5 Hz, 2H), 7.63 (d, *J* = 7.5 Hz, 2H), 7.57 (t, *J* = 7.7 Hz, 1H), 7.43 (t, *J* = 7.7 Hz, 4H), 7.31 (t, *J* = 7.5 Hz, 2H), 7.05 (s, 1H). **<sup>13</sup>C NMR (101 MHz, CDCl<sub>3</sub>)** δ 167.5, 142.4, 141.3, 133.4, 130.2, 130.2, 129.7, 128.6, 128.1, 126.3, 120.3, 75.8. **HRMS (ESI)** *m/z* 304.1338 [calc'd for C<sub>20</sub>H<sub>18</sub>NO<sub>2</sub> (M + NH<sub>4</sub><sup>+</sup>) 304.1333].

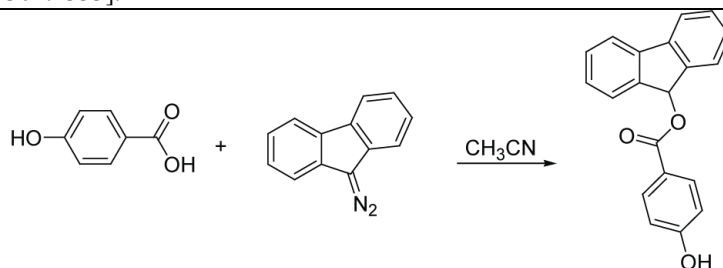

Diazofluorene (0.012 g, 0.063 mmol) was added to a solution of 4-hydroxybenzoic acid (0.009 g, 0.063 mmol) in anhydrous acetonitrile (0.60 mL), and the reaction mixture was stirred for 10 h before being concentrated under reduced pressure and the resulting residue was purified by silica gel chromatography to give fluorenyl-4-hydroxybenzoate (0.016 g, 85%).

**<sup>1</sup>H NMR (400 MHz, CDCl<sub>3</sub>)** δ 7.98 (d, *J* = 8.6 Hz, 2H), 7.68 (d, *J* = 7.6 Hz, 2H), 7.60 (d, *J* = 7.6 Hz, 2H), 7.41 (t, *J* = 7.6 Hz, 2H), 7.28 (t, *J* = 7.6 Hz, 2H), 7.00 (s, 1H), 6.82 (d, *J* = 8.6 Hz, 2H). **<sup>13</sup>C NMR (126 MHz, CDCl<sub>3</sub>)** δ 167.1, 160.0, 142.5, 141.3, 132.6, 129.7, 128.1, 126.3, 122.9, 120.3, 115.4, 75.6. **HRMS (ESI)** *m/z* 320.1293 [calc'd for C<sub>20</sub>H<sub>18</sub>NO<sub>3</sub> (M+NH<sub>4</sub><sup>+</sup>) 320.1282].

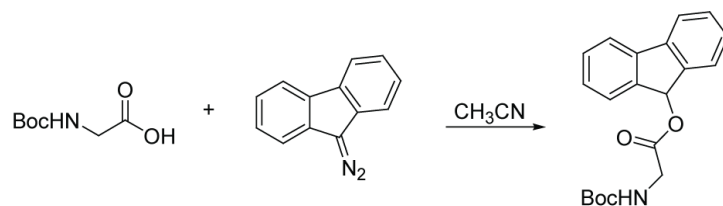

Diazofluorene (0.006 g, 0.031 mmol) was added to a solution of Boc-protected glycine (0.006 g, 0.031 mmol) in anhydrous acetonitrile (0.31 mL), and the reaction mixture was stirred for 2 h until determined to be complete by thin-layer chromatography (*R<sub>f</sub>* = 0.6 in 30% EtOAc, 70% hexanes). The reaction mixture was concentrated under reduced pressure and purified by silica gel chromatography to give fluorenyl-Boc-protected glycine (0.009 g, 85%).

**<sup>1</sup>H NMR (400 MHz, CDCl<sub>3</sub>)** δ 7.65 (d, *J* = 7.5 Hz, 2H), 7.52 (d, *J* = 7.5 Hz, 2H), 7.40 (t, *J* = 7.5 Hz, 2H), 7.28 (t, *J* = 7.5 Hz, 2H), 6.81 (s, 1H), 5.03 (bs, 1H), 4.01 (d, *J* = 5.7 Hz, 2H), 1.44 (s, 9H). **<sup>13</sup>C NMR (126 MHz, CDCl<sub>3</sub>)** δ 171.4, 155.9, 141.6, 141.3, 130.0, 128.2, 126.2, 120.3, 80.4, 76.2, 43.0, 28.5. **HRMS (ESI)** *m/z* 340.1535 [calc'd for C<sub>20</sub>H<sub>22</sub>NO<sub>4</sub> (M+H<sup>+</sup>) 340.1544].

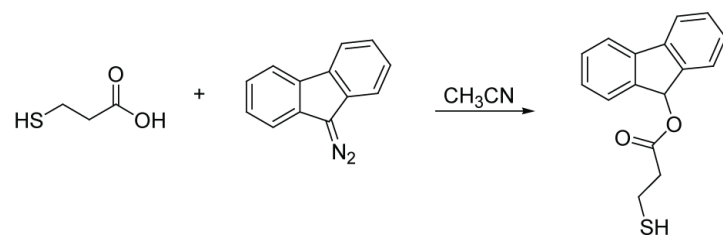

Diazofluorene (0.018 g, 0.094 mmol) was added to a solution of 3-mercaptopropanoic acid (0.010 g, 0.094 mmol) in anhydrous acetonitrile (0.94 mL), and the reaction mixture was stirred for 8 h before being concentrated under reduced pressure. The resulting residue was purified by silica gel chromatography to give fluorenyl-3-mercaptopropanoate (0.020 g, 80%).

**<sup>1</sup>H NMR (400 MHz, CDCl<sub>3</sub>)** δ 7.65 (d, *J* = 7.5 Hz, 2H), 7.53 (d, *J* = 7.5 Hz, 2H), 7.40 (t, *J* = 7.5 Hz, 2H), 7.28 (t, *J* = 7.5 Hz, 2H), 6.83 (s, 1H), 2.83 (dd, *J* = 8.2, 6.3 Hz, 2H), 2.76 (t, *J* = 6.3 Hz, 2H), 1.65 (t, *J* = 8.2 Hz, 1H). **<sup>13</sup>C NMR (126 MHz, CDCl<sub>3</sub>)** δ 172.6, 142.0, 141.3, 129.8, 128.1, 126.1, 120.3, 75.6, 39.0, 20.2. **HRMS (ESI)** *m/z* 288.1059 [calc'd for C<sub>16</sub>H<sub>18</sub>NO<sub>2</sub>S (M+NH<sub>4</sub><sup>+</sup>) 288.1053].

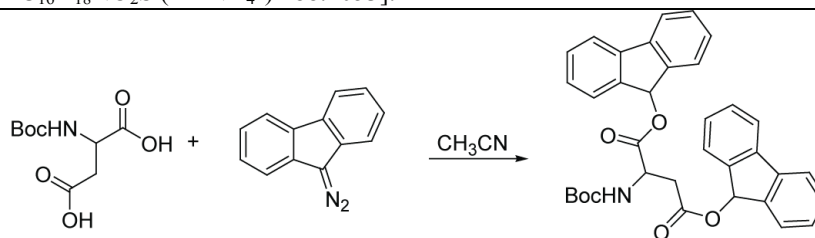

Diazofluorene (0.012 g, 0.063 mmol) was added to a solution of Boc-aspartic acid (0.007 g, 0.0315 mmol) in anhydrous acetonitrile (0.31 mL), and the reaction mixture was stirred for 5 h before being concentrated under reduced pressure and purified by silica gel chromatography to give bisfluorenyl-Boc-aspartate (0.019 g, 89%).

**<sup>1</sup>H NMR (500 MHz, CDCl<sub>3</sub>)** δ 7.74–7.64 (m, 4H), 7.59–7.51 (m, 4H), 7.50–7.37 (m, 4H), 7.36–7.15 (m, 4H), 6.90 (s, 1H), 6.77 (s, 1H), 5.70 (d, *J* = 8.6 Hz, 1H), 4.83–4.72 (m, 1H), 3.14 (dd, *J* = 17.1, 4.5 Hz, 1H), 3.00 (dd, *J* = 17.1, 4.7 Hz, 1H), 1.49 (s, 9H). **<sup>13</sup>C NMR (126 MHz, CDCl<sub>3</sub>)** δ 172.0, 172.0, 155.7, 141.6, 141.5, 141.3, 141.2, 129.9, 129.8, 128.2, 128.1, 126.4, 126.1, 120.3, 120.2, 80.5, 76.4, 75.9, 50.6, 37.2, 28.5. **HRMS (ESI)** *m/z* 579.2478 [calc'd for C<sub>35</sub>H<sub>35</sub>N<sub>2</sub>O<sub>6</sub> (M+NH<sub>4</sub><sup>+</sup>) 579.2490].

## B. Esterification Screening in Acetonitrile/Buffer Solution

**Representative Procedure: Each mixture was reacted for 6 h and was analyzed at that time.**

Diazofluorene (0.0060 g, 0.0313 mmol) was added to a solution of bromoacetic acid (0.0044 g, 0.0313 mmol) in a mixture of acetonitrile:buffer (10 mM MES–NaOH, pH 5.5) (0.4 mL), and the reaction mixture was stirred for 6 h. The reaction mixture was concentrated under reduced pressure, and the ratio of products was determined by <sup>1</sup>H-NMR. The ester data was reported above for each compound and below are the data for the hydrolysis products used for comparison.

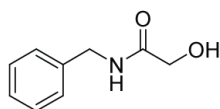

**N-Benzylacetamidyl Hydrolysis Product:**

**<sup>1</sup>H NMR (400 MHz, CDCl<sub>3</sub>)** δ 7.38–7.28 (m, 5H), 4.52 (d, *J* = 5.9 Hz, 2H), 4.19 (d, *J* = 5.2 Hz, 2H), 2.24 (t, *J* = 5.2 Hz, 1H). **<sup>13</sup>C NMR (126 MHz, CDCl<sub>3</sub>)** δ 171.2, 138.0, 129.0, 128.1, 127.9, 62.5, 43.3. **HRMS (ESI)** *m/z* 166.0864 [calc'd for C<sub>9</sub>H<sub>12</sub>NO<sub>2</sub> (M+H<sup>+</sup>) 166.0863].

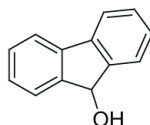

**Fluorenyl Hydrolysis Product:**

**<sup>1</sup>H NMR (400 MHz, CDCl<sub>3</sub>)** δ 7.66 (d, *J* = 7.6 Hz, 4H), 7.40 (t, *J* = 7.6 Hz, 2H), 7.33 (t, *J* = 7.6 Hz, 2H), 5.60 (bs, 1H). **<sup>13</sup>C NMR (126 MHz, CDCl<sub>3</sub>)** δ 145.8, 140.2, 129.3, 128.1, 125.4, 120.2, 75.5. **HRMS (EI)** *m/z* 182.0724 [calc'd for C<sub>13</sub>H<sub>10</sub>O (M<sup>+</sup>) 182.0727].

### C. Thioester versus Thionoester Formation with Thioacetic Acid

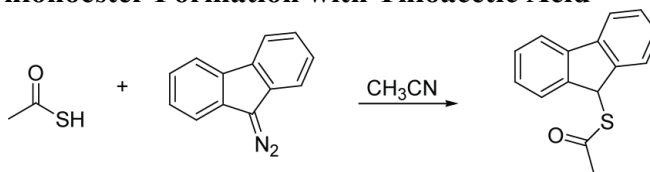

Diazofluorene (0.017 g, 0.089 mmol) was added to a solution of thioacetic acid (0.007 g, 0.089 mmol) in anhydrous acetonitrile (0.9 mL), and the reaction mixture was stirred for 1 min, when the reaction was determined to be complete by thin-layer chromatography ( $R_f = 0.8$  in 30% EtOAc, 70% hexanes). The reaction mixture was concentrated under reduced pressure and purified by silica gel chromatography to give fluorenyl-thioacetate (0.020 g, 94%) in which sulfur was incorporated exclusively.

$^1\text{H NMR}$  (400 MHz,  $\text{CDCl}_3$ )  $\delta$  7.73 (d,  $J = 7.5$  Hz, 2H), 7.54 (d,  $J = 7.5$  Hz, 2H), 7.40 (t,  $J = 7.5$  Hz, 2H), 7.32 (t,  $J = 7.5$  Hz, 2H), 5.88 (s, 1H), 2.52 (s, 3H).  $^{13}\text{C NMR}$  (126 MHz,  $\text{CDCl}_3$ )  $\delta$  196.3, 144.0, 140.9, 128.5, 127.8, 125.6, 120.2, 46.9, 30.7. **HRMS** (ESI)  $m/z$  258.0953 [calc'd for  $\text{C}_{15}\text{H}_{16}\text{NOS}$  ( $\text{M}+\text{NH}_4^+$ ) 258.0948].

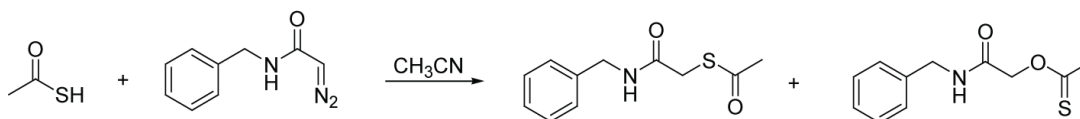

Diazobenzylacetamide (0.010 g, 0.057 mmol) was added to a solution of thioacetic acid (0.004 mL, 0.057 mmol) in anhydrous acetonitrile (0.57 mL), and the reaction mixture was stirred for 1 h, when the reaction was determined to be complete by thin-layer chromatography ( $R_f = 0.6, 0.7$  in 70% EtOAc, 30% hexanes). The reaction mixture was concentrated under reduced pressure and purified by silica gel chromatography to give both benzyl acetamide-thioacetate (0.008 g, 62%) and benzyl acetamido-thionoacetate (0.004 g, 31%).

#### Sulfur Attack (Benzyl-acetamide-thioacetate [ $R_f = 0.6$ ]):

$^1\text{H NMR}$  (400 MHz,  $\text{CDCl}_3$ )  $\delta$  7.40–7.17 (m, 5H), 6.47 (bs, 1H), 4.43 (d,  $J = 5.8$  Hz, 2H), 3.59 (s, 2H), 2.39 (s, 3H).  $^{13}\text{C NMR}$  (126 MHz,  $\text{CDCl}_3$ )  $\delta$  195.9, 168.0, 137.8, 128.8, 127.6, 127.6, 43.8, 33.0, 30.3. **HRMS** (ESI)  $m/z$  224.0746 [calc'd for  $\text{C}_{11}\text{H}_{14}\text{NO}_2\text{S}$  ( $\text{M}+\text{H}^+$ ) 224.0740].

#### Oxygen Attack (Benzyl-acetamide-thionoacetate [ $R_f = 0.7$ ]):

$^1\text{H NMR}$  (400 MHz,  $\text{CDCl}_3$ )  $\delta$  7.44–7.25 (m, 5H), 6.39 (bs, 1H), 4.98 (s, 2H), 4.54 (d,  $J = 5.9$  Hz, 2H), 2.64 (s, 3H).  $^{13}\text{C NMR}$  (126 MHz,  $\text{CDCl}_3$ )  $\delta$  217.5, 166.1, 137.5, 128.9, 127.9, 127.8, 69.8, 43.2, 34.2. **HRMS** (ESI)  $m/z$  246.0552 [calc'd for  $\text{C}_{11}\text{H}_{13}\text{NO}_2\text{SNa}$  ( $\text{M}+\text{Na}^+$ ) 246.0560].

### 3. RNase A-Esterification Experiments

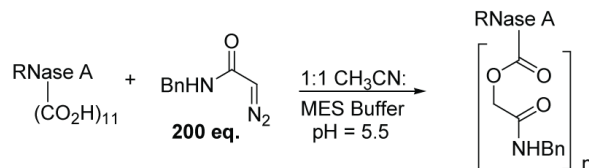

Ribonuclease A (0.001 g, 0.073  $\mu\text{mol}$ ) was dissolved in 100  $\mu\text{L}$  of 10 mM MES–NaOH buffer, pH 5.5, and diazobenzylacetamide (**1**) (0.0026 g, 14.6  $\mu\text{mol}$ ) was dissolved in 100  $\mu\text{L}$  of acetonitrile. The two solutions were combined, and the reaction mixture was stirred for 4 h at 37  $^\circ\text{C}$ . Any remaining diazo compound was then quenched by adding 100  $\mu\text{L}$  of 100 mM acetic acid, and the reaction mixture was concentrated under reduced pressure. The extent of esterification was determined to be <1 esters per RNase A by MALDI–TOF mass spectrometry. (Note: When the same conditions were employed with only 10 equiv of diazo compound, no esterification was observed).



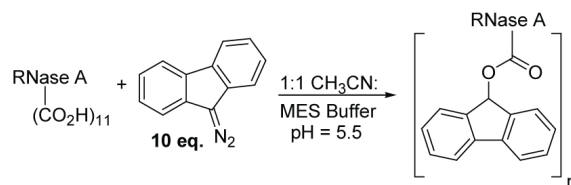

Ribonuclease A (0.001 g, 0.073  $\mu\text{mol}$ ) was dissolved in 100  $\mu\text{L}$  of 10 mM MES–NaOH buffer, pH 5.5, and diazofluorene (**2**) (0.001 g, 5.2  $\mu\text{mol}$ ) was dissolved in 1.00 mL of acetonitrile. An aliquot (100  $\mu\text{L}$ ) of the latter solution was added to the former solution, and the reaction mixture was stirred for 4 h at 37  $^{\circ}\text{C}$ . Any remaining diazo compound was then quenched by adding 100  $\mu\text{L}$  of 100 mM acetic acid, and the reaction mixture was concentrated under reduced pressure. The extent of esterification was determined to be  $\sim 3$  esters per RNase A by MALDI–TOF mass spectrometry.

#### 4. Trypsin-Digestion and MS/MS Experiments to Identify Esterified Carboxyl Groups in RNase A

Protein digestion and mass spectrometric analysis was performed at the Mass Spectrometry Facility of the Biotechnology Center at the University of Wisconsin–Madison. Briefly, crude RNase A (0.10 mg) was precipitated with three volumes of ice-cold acetone, incubated for 30 min at  $-20$   $^{\circ}\text{C}$ , and subjected to centrifugation for 10 min at 16,000g. The pellet was washed once with ice-cold acetone, subjected to centrifugation again, and then washed once more with ice-cold methanol. The pelleted protein was re-solubilized and denatured in 15  $\mu\text{L}$  of 8 M urea/50 mM  $\text{NH}_4\text{HCO}_3$  (pH 8.5) for 10 min, then diluted with 60  $\mu\text{L}$  containing 2.5  $\mu\text{L}$  of 25 mM dithiothreitol (DTT), 5  $\mu\text{L}$  MeOH, 0.2  $\mu\text{L}$  of 1.0 M Tris–HCl buffer, pH 7.5, and 37.3  $\mu\text{L}$  of 25 mM  $\text{NH}_4\text{HCO}_3$  (pH 8.5). The resulting solution was incubated at 50  $^{\circ}\text{C}$  for 15 min, and then cooled with ice to room temperature. A 3- $\mu\text{L}$  aliquot of 55 mM iodoacetamide was added, and the resulting solution was incubated in darkness at room temperature for 15 min before the reaction was quenched by adding 8  $\mu\text{L}$  of 25 mM DTT. Subsequently were added 14  $\mu\text{L}$  of 25 mM  $\text{NH}_4\text{HCO}_3$ , pH 8.5, and 15  $\mu\text{L}$  of trypsin solution, which was 100 ng/ $\mu\text{L}$  Trypsin Gold from Promega (Madison, WI) in 25 mM  $\text{NH}_4\text{HCO}_3$ , to achieve a final volume of 100  $\mu\text{L}$ . Digestion with trypsin was allowed to proceed for 1 h at 42  $^{\circ}\text{C}$ . Then, an additional 10  $\mu\text{L}$  of trypsin solution was added such that the final enzyme/substrate w/w ratio was 1:40, and digestion was allowed to proceed overnight at 37  $^{\circ}\text{C}$ . Digestion was terminated by acidification with 2.5% w/v trifluoroacetic acid to a final concentration of 0.3% w/v, and 8  $\mu\text{L}$  ( $\sim 6.5$   $\mu\text{g}$  RNase A) was used for nanoLC-MS/MS analysis.

HPLC was performed using a 1100 series system from Agilent Technologies (Santa Clara, CA) equipped with an isocratic loading pump and nano-flow gradient pump at a flow rate of 15  $\mu\text{L}/\text{min}$ . Samples of RNase A ( $\sim 6.5$   $\mu\text{g}$ ) were washed from the autosampler onto a  $0.3 \times 5$  mm Stablebond C18 trapping cartridge. For elution, the nano-flow pump was switched into line with the trapping cartridge, and peptides were eluted onto an in-house–fabricated 15-cm resolving C18 column from Bruker–Michrom (Auburn, CA) with a laser-pulled tip (P-2000) from Sutter Instrument (Novato, CA). Peptides were eluted with solvents comprised of 0.1 M acetic acid in water (solvent A) and 0.1 M acetic acid/95% v/v acetonitrile in water (solvent B). The gradient consisted of a 20-min loading and desalting period with column equilibration at 1% solvent B, an increase to 40% B over 195 min, a ramp to 60% B over 20 min, an increase to 100% B in 5 min, and a hold for 3 min. The column was then re-equilibrated at 1% B for 30 min. The flow rate for peptide elution and re-equilibration was 200 nL/min.

Peptides were analyzed by nanoLC-MS/MS using the 1100 series system connected to an LTQ-Orbitrap XL hybrid linear ion trap-orbitrap mass spectrometer from Thermo Fisher Scientific (Waltham, MA) equipped with a nanoelectrospray ion source. Capillary HPLC was performed using an in-house–fabricated 15-cm C18 column packed with Jupiter 4- $\mu\text{m}$  C12 particles from Phenomenex (Torrance, CA) and a laser-pulled tip (P-2000) from Sutter Instrument with  $360 \times 75$   $\mu\text{m}$  fused silica tubing. Sample loading (8  $\mu\text{L}$ ) and desalting were done at 10  $\mu\text{L}/\text{min}$  using a trapping column in line with the autosampler (Zorbax 300SB-C18, 5  $\mu\text{m}$ ,  $5 \times 0.3$  mm from Agilent Technologies). Peptide elution used solvents comprised of 0.1% v/v formic acid in water (solvent A) and 0.1% v/v formic acid/95% v/v acetonitrile in water (solvent B). The gradient consisted of a 20-min loading and desalting period with column equilibration at 1% solvent B, an increase to 40% B over 195 min, ramp to 60% B over 20 min, an increase to 100% B in 5 min, and a hold for 3 min. The column was then re-equilibrated at 1% B for 30 min. The flow rate for peptide elution and re-equilibration was 200 nL/min.



The LTQ-Orbitrap was set to acquire MS/MS spectra in data-dependent mode as follows. MS survey scans from  $m/z$  300 to 2000 were collected in centroid mode at a resolving power of 100,000. MS/MS spectra were collected on the five most-abundant signals in each survey scan. Dynamic exclusion was employed to increase dynamic range and maximize peptide identifications. This feature excluded precursors up to 0.55  $m/z$  below and 1.05  $m/z$  above previously selected precursors. Precursors remained on the exclusion list for 40 s. Peptide mass tolerance was set at 20 ppm and fragment mass at 0.8 Da. Singly-charged ions and ions for which the charge state could not be assigned were rejected from consideration.

## 5. FLAG–RNase A-Esterification Experiments

### *Preparation of FLAG–RNase A*

The FLAG sequence (DYKDDDDK) was inserted between the N-terminal methionine and Lys2 of RNase A in the pET22b(+) vector that directs the expression of wild-type RNase A in *Escherichia coli*. The protein was produced and purified by methods similar to those described previously.<sup>1</sup> The protein was characterized by SDS–PAGE and MALDI–TOF ( $m/z$  14816) (Figure S11A). The purified protein was obtained at approximately 25 mg/L.

### *Esterification of FLAG–RNase A*

The esterification of FLAG–RNase A with diazofluorene (**2**) was carried out as described in Section 3. Esterification was verified by MALDI–TOF, and determined to be of similar magnitude to that of native RNase A (Figure S11B and S11C).

### *Hydrolysis of Esterified Carboxyl Groups in FLAG–RNase A by a HeLa Cell Lysate*

HeLa cells were grown to confluence in a 10-cm<sup>2</sup> dish before their collection and lysis with M-PER mammalian protein extraction reagent from Thermo Fisher Scientific. The presence of esterase activity in the lysate was verified by a colorimetric assay using *p*-nitrophenyl acetate. A solution of esterified FLAG–RNase A (10 μg) was added to 200 μL of HeLa cell lysate, and the reaction mixture was nutated at ambient temperature overnight. FLAG–RNase A was subsequently purified with Anti-FLAG<sup>®</sup> M2 Magnetic Beads (Sigma–Aldrich). The regeneration of native FLAG–RNase A was confirmed with MALDI–TOF mass spectrometry (Figure S12) and assays of ribonucleolytic activity (Figure S13).

### *Ribonucleolytic Activity Assays*

The ribonucleolytic activity of RNase A, FLAG–RNase A, FLAG–RNase A esterified with diazofluorene (**2**) (10 or 200 equiv), and esterified FLAG–RNase A exposed to HeLa cell lysate was determined by quantifying the cleavage of 6-FAM–dArUdAdA–6-TAMRA, as described previously.<sup>2</sup> Assays were carried out in triplicate at ambient temperature in a black polystyrene 96-well plate in 200 μL of 0.10 M MES–NaOH buffer, pH 6.0, containing NaCl (0.10 M). The resulting fluorescence data were fitted to the equation:  $k_{\text{cat}}/K_M = (\Delta I/\Delta t)/(I_f - I_0)[E]$ , in which  $\Delta I/\Delta t$  is the initial reaction velocity,  $I_0$  is the fluorescence intensity before addition of any ribonuclease,  $I_f$  is the fluorescence intensity after complete substrate hydrolysis, and  $[E]$  is the total ribonuclease concentration.

## 6. His<sub>6</sub>–RFP-Esterification Experiments

### *Preparation of His<sub>6</sub>–RFP*

A gene encoding an mCherry variant of the red fluorescent protein (RFP)<sup>3</sup> was inserted into a novel vector derived from the pET22b from Novagen (Madison, WI). The resulting vector encoded an N-terminal His<sub>6</sub> tag followed by a spacer region and a TEV protease recognition sequence. The vector also contained a T7 promoter and ampicillin-resistance gene, but not *lacI*. (As RFP is not toxic to *E. coli*, its leaky gene expression is not a concern.) The vector was modified to contain a *StuI* site immediately after the TEV cleavage sequence, allowing for facile insertion of target genes with an N-terminal tag.

The expression vector was transformed into electrocompetent BL21(DE3) *E. coli* cells from New England Biolabs (Ipswich MA), which were then plated on LB–agar containing ampicillin. On the following day, a single colony was used to inoculate 50 mL of LB medium, and the resulting culture was grown overnight at 37 °C in a shaking incubator. On the following day, 5 mL of starter culture was used to inoculate 1 L of Terrific Broth medium (Research Products International) prepared previously in a 3.8-L glass flask. Ampicillin was also added to each flask to a final concentration of 200 μg/mL. Flasks were shaken at 200 rpm at 37 °C in a large shaking incubator until cells reached log phase ( $OD$  0.6–0.8 at 600 nm). The incubator temperature was then switched to 20 °C, and cells

were equilibrated at the new temperature for 20 min. The production of His<sub>6</sub>-RFP was induced by adding IPTG from Research Products International (Mt. Prospect, IL) to 1 mM, and the cells were grown overnight at 20 °C in a shaking incubator.

Cells were harvested by centrifugation for 20 min at 5,000 rpm at 4 °C. Cell pellets, which were bright magenta in color, were collected and resuspended in a lysis buffer, which was 50 mM Tris-HCl buffer, pH 7.0, containing NaCl (100 mM), imidazole (30 mM), Triton X-100 (1% v/v), and sucrose (20% w/v). The buffer was filter-sterilized, but not autoclaved, and 15 mL of buffer was used for every 2 L of liquid growth. Cell pellets were vortexed and stored frozen at -20 °C overnight.

Cells were lysed with a TS Series cell disrupter from Constant Systems (Kennesaw, GA), and the lysate was subjected to centrifugation immediately for 1 h at 11,000 rpm at 4 °C. The supernatant was filtered with either 5- $\mu$ M syringe filters from EMD Millipore (Darmstadt, Germany) or glass fiber pre-filters from Sartorius AG (Göttingen, Germany). Solid, pelleted material was discarded. Filtered supernatants were stored on ice and protected from light prior to protein purification.

Filtered cell lysates were purified by chromatography on Ni-NTA resin from GE Healthcare (Little Chalfont, UK) or Thermo Fisher Scientific, and elution using a linear gradient of imidazole. The binding (wash) buffer was 20 mM sodium phosphate buffer, pH 7.4, containing NaCl (500 mM) and imidazole (30 mM). The elution buffer was 20 mM sodium phosphate buffer, pH 7.4, containing NaCl (500 mM) and imidazole (500 mM). Eluted fractions were collected, pooled, and dialyzed against 4 L of 20 mM Tris-HCl buffer, pH 7.0, containing EDTA (1 mM). Dialyzed material was then purified again using anion-exchange chromatography on a hiTrap Q column. Protein was eluted by using a linear gradient of NaCl. The binding (wash) buffer was 20 mM Tris-HCl buffer, pH 7.0, containing EDTA (1 mM). The elution buffer was 20 mM Tris-HCl buffer, pH. 7.0, containing EDTA (1 mM), NaCl (1.0 M). Upon elution, colored fractions were pooled and concentrated if necessary. The yield of His<sub>6</sub>-RFP was 55 mg per L of culture.

#### *Esterification of His<sub>6</sub>-RFP*

RFP (0.015 g, 0.51  $\mu$ mol) was dissolved in 1.70 mL of 10 mM MES-NaOH buffer, pH 5.5, and diazofluorene (**2**) (0.001 g, 5.21  $\mu$ mol) was dissolved in 1.70 mL of acetonitrile. The two solutions were combined, and the reaction mixture was nutated for 12 h in the dark. Any remaining diazo compound was then quenched by adding 100  $\mu$ L of 100 mM acetic acid. The extent of esterification was determined to be 1-3 esters per RFP by MALDI-TOF mass spectrometry.

#### *Hydrolysis of Esterified His<sub>6</sub>-RFP by a HeLa Cell Lysate*

HeLa cells were grown to confluence in a 10-cm<sup>2</sup> dish before their collection and lysis with M-PER mammalian protein extraction reagent from Thermo Fisher Scientific. The presence of esterase activity in the lysate was verified by a colorimetric assay using *p*-nitrophenyl acetate. A solution of esterified His<sub>6</sub>-RFP (10  $\mu$ g) was added to 200  $\mu$ L of HeLa cell lysate, and the reaction mixture was nutated at ambient temperature overnight. His<sub>6</sub>-RFP was subsequently purified with HisPur Ni-NTA magnetic beads from Thermo Fisher Scientific. The regeneration of native His<sub>6</sub>-RFP was confirmed with MALDI-TOF mass spectrometry (Figure S14).

### 7. MALDI-TOF Mass Spectrometry Data for RNase A-Esterification Experiments

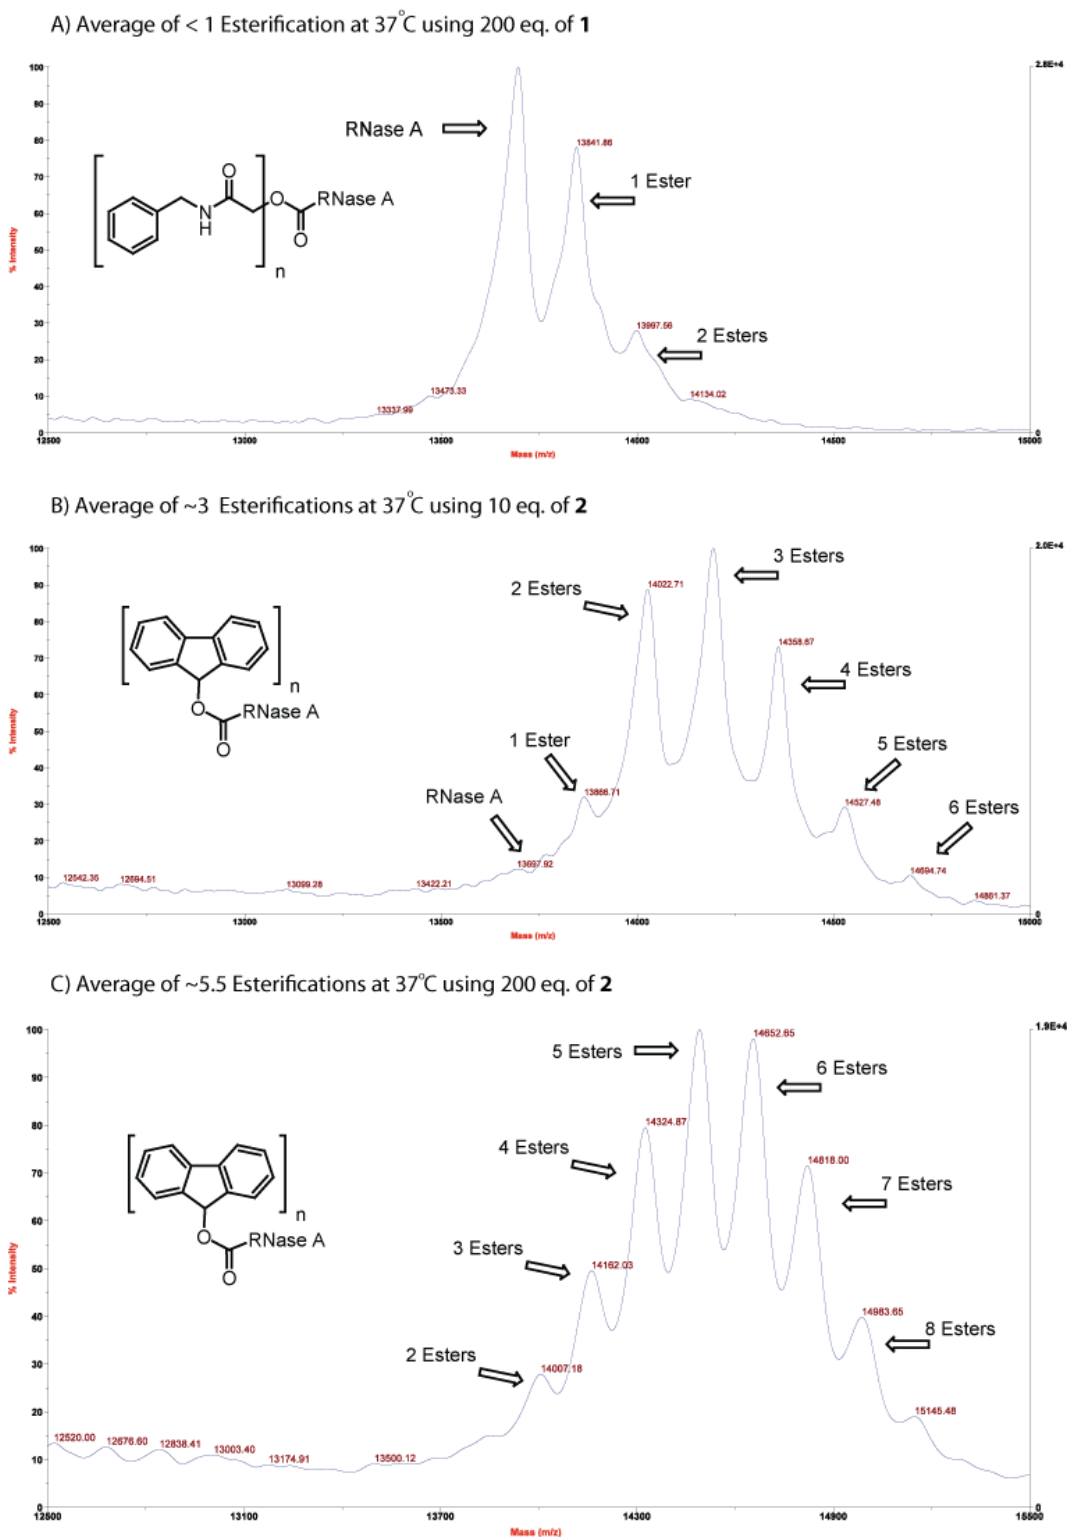

Figure S1. MALDI MS of Labeled RNase A

### 8. MS/MS Data for Trypsin-Digestion Experiments

**MASCOT** Mascot Search Results

Peptide View

MS/MS Fragmentation of **FERQHMDSTSAASSSNYCNQMMK**  
 Found in **gij111141**, RNase A 27-150

Match to Query 3128: 2943.197704 from(736.806702,4+) intensity(27277.8000)  
 Title: NAM\_100-20.01662.01662.4  
 Data file NAM\_100-20.mgf

Click mouse within plot area to zoom in by factor of two about that point

Or, Plot from 200 to 1700 Da Full range

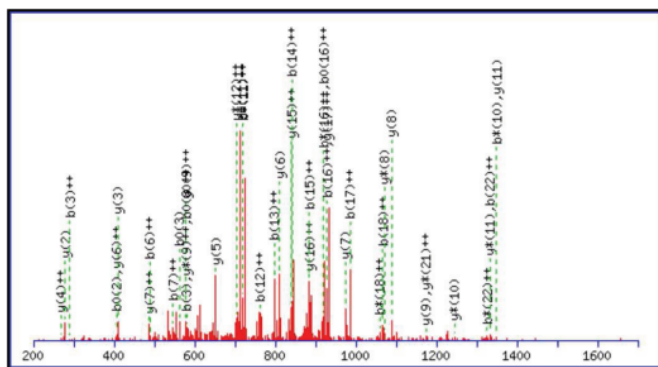

Monoisotopic mass of neutral peptide Mr(calc): 2943.2044

Fixed modifications: Carbamidomethyl (C)

Variable modifications:

**E2** : Raines\_147 (DE)

Ions Score: 28 Expect: 0.00022

Matches ( **Bold Red** ): 43/254 fragment ions using 103 most intense peaks

| #  | b               | b <sup>++</sup>  | b*               | b <sup>+++</sup> | b <sup>0</sup>  | b <sup>0++</sup> | Seq.     | y                | y <sup>++</sup> | y*               | y <sup>+++</sup> | y <sup>0</sup> | y <sup>0++</sup> | #  |
|----|-----------------|------------------|------------------|------------------|-----------------|------------------|----------|------------------|-----------------|------------------|------------------|----------------|------------------|----|
| 1  | 148.0757        | 74.5415          |                  |                  |                 |                  | F        |                  |                 |                  |                  |                |                  | 24 |
| 2  | 424.1867        | 212.5970         |                  |                  | <b>406.1761</b> | 203.5917         | <b>E</b> | 2797.1433        | 1399.0753       | 2780.1168        | 1390.5620        | 2779.1327      | 1390.0700        | 23 |
| 3  | <b>580.2878</b> | <b>290.6475</b>  | 563.2613         | 282.1343         | <b>562.2772</b> | 281.6423         | R        | 2521.0323        | 1261.0198       | 2504.0057        | 1252.5065        | 2503.0217      | 1252.0145        | 22 |
| 4  | 708.3464        | 354.6768         | 691.3198         | 346.1636         | 690.3358        | 345.6716         | Q        | 2364.9312        | 1182.9692       | 2347.9046        | <b>1174.4560</b> | 2346.9206      | 1173.9639        | 21 |
| 5  | 845.4053        | 423.2063         | 828.3788         | 414.6930         | 827.3947        | 414.2010         | H        | 2236.8726        | 1118.9399       | 2219.8460        | 1110.4267        | 2218.8620      | 1109.9347        | 20 |
| 6  | 976.4458        | <b>488.7265</b>  | 959.4192         | 480.2133         | 958.4352        | 479.7213         | M        | 2099.8137        | 1050.4105       | 2082.7871        | 1041.8972        | 2081.8031      | 1041.4052        | 19 |
| 7  | 1091.4727       | <b>546.2400</b>  | 1074.4462        | 537.7267         | 1073.4622       | 537.2347         | D        | 1968.7732        | 984.8902        | 1951.7467        | 976.3770         | 1950.7626      | 975.8850         | 18 |
| 8  | 1178.5048       | 589.7560         | 1161.4782        | 581.2427         | 1160.4942       | <b>580.7507</b>  | S        | 1853.7463        | <b>927.3768</b> | 1836.7197        | 918.8635         | 1835.7357      | 918.3715         | 17 |
| 9  | 1265.5368       | 633.2720         | 1248.5102        | 624.7588         | 1247.5262       | 624.2667         | S        | 1766.7142        | <b>883.8608</b> | 1749.6877        | 875.3475         | 1748.7037      | 874.8555         | 16 |
| 10 | 1366.5845       | 683.7959         | <b>1349.5579</b> | 675.2826         | 1348.5739       | 674.7906         | T        | 1679.6822        | <b>840.3447</b> | 1662.6557        | 831.8315         | 1661.6716      | 831.3395         | 15 |
| 11 | 1453.6165       | 727.3119         | 1436.5899        | <b>718.7986</b>  | 1435.6059       | <b>718.3066</b>  | S        | 1578.6345        | 789.8209        | 1561.6080        | 781.3076         | 1560.6240      | 780.8156         | 14 |
| 12 | 1524.6536       | <b>762.8304</b>  | 1507.6271        | 754.3172         | 1506.6430       | 753.8252         | A        | 1491.6025        | 746.3049        | 1474.5759        | 737.7916         | 1473.5919      | 737.2996         | 13 |
| 13 | 1595.6907       | <b>798.3490</b>  | 1578.6642        | 789.8357         | 1577.6802       | 789.3437         | A        | 1420.5654        | 710.7863        | 1403.5388        | <b>702.2731</b>  | 1402.5548      | 701.7810         | 12 |
| 14 | 1682.7228       | <b>841.8650</b>  | 1665.6962        | 833.3517         | 1664.7122       | 832.8597         | S        | <b>1349.5283</b> | 675.2678        | <b>1332.5017</b> | 666.7545         | 1331.5177      | 666.2625         | 11 |
| 15 | 1769.7548       | <b>885.3810</b>  | 1752.7282        | 876.8678         | 1751.7442       | 876.3757         | S        | 1262.4962        | 631.7518        | <b>1245.4697</b> | 623.2385         | 1244.4857      | 622.7465         | 10 |
| 16 | 1856.7868       | <b>928.8970</b>  | 1839.7603        | <b>920.3838</b>  | 1838.7762       | <b>919.8918</b>  | S        | <b>1175.4642</b> | 588.2357        | 1158.4377        | <b>579.7225</b>  | 1157.4536      | <b>579.2305</b>  | 9  |
| 17 | 1970.8297       | <b>985.9185</b>  | 1953.8032        | 977.4052         | 1952.8192       | 976.9132         | N        | <b>1088.4322</b> | 544.7197        | <b>1071.4056</b> | 536.2065         |                |                  | 8  |
| 18 | 2133.8931       | <b>1067.4502</b> | 2116.8665        | <b>1058.9369</b> | 2115.8825       | 1058.4449        | Y        | <b>974.3893</b>  | <b>487.6983</b> | 957.3627         | 479.1850         |                |                  | 7  |
| 19 | 2293.9237       | 1147.4655        | 2276.8972        | 1138.9522        | 2275.9131       | 1138.4602        | C        | <b>811.3259</b>  | <b>406.1666</b> | 794.2994         | 397.6533         |                |                  | 6  |
| 20 | 2407.9666       | 1204.4870        | 2390.9401        | 1195.9737        | 2389.9561       | 1195.4817        | N        | <b>651.2953</b>  | 326.1513        | 634.2687         | 317.6380         |                |                  | 5  |
| 21 | 2536.0252       | 1268.5162        | 2518.9987        | 1260.0030        | 2518.0147       | 1259.5110        | Q        | 537.2524         | <b>269.1298</b> | 520.2258         | 260.6165         |                |                  | 4  |
| 22 | 2667.0657       | <b>1334.0365</b> | 2650.0392        | <b>1325.5232</b> | 2649.0551       | 1325.0312        | M        | <b>409.1938</b>  | 205.1005        | 392.1672         | 196.5873         |                |                  | 3  |
| 23 | 2798.1062       | 1399.5567        | 2781.0796        | 1391.0435        | 2780.0956       | 1390.5514        | M        | <b>278.1533</b>  | 139.5803        | 261.1267         | 131.0670         |                |                  | 2  |
| 24 |                 |                  |                  |                  |                 |                  | K        | 147.1128         | 74.0600         | 130.0863         | 65.5468          |                |                  | 1  |

Figure S2. Benzylacetamidyl ester of glutamic acid 9 of RNase A.

**MATRIX SCIENCE** Mascot Search Results

Peptide View

MS/MS Fragmentation of QHMDSTSAASSSNYCQMMK  
 Found in [gi|111141](#), RNase A 27-150

Match to Query 2547: 2510.978172 from(838.000000,3+) intensity(109235.0000)  
 Title: NAM\_100-20.01711.01711.3  
 Data file NAM\_100-20.mgf

Click mouse within plot area to zoom in by factor of two about that point

Or, Plot from  to  Da

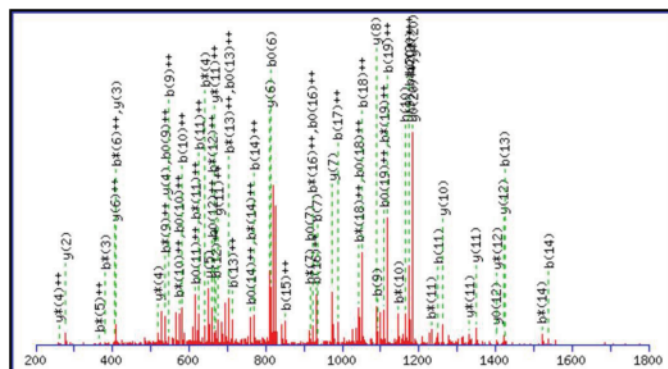

Monoisotopic mass of neutral peptide Mr(calc): 2510.9923  
 Fixed modifications: Carbamidomethyl (C)  
 Variable modifications:  
 D4 : Raines\_147 (DE)  
 Ions Score: 49 Expect: 5.7e-007  
 Matches ( **Bold Red** ): 69/218 fragment ions using 120 most intense peaks

| #  | b                | b <sup>++</sup>  | b <sup>*</sup>   | b <sup>*++</sup> | b <sup>0</sup>  | b <sup>0++</sup> | Seq. | y                | y <sup>++</sup> | y <sup>*</sup>   | y <sup>*++</sup> | y <sup>0</sup>   | y <sup>0++</sup> | #  |
|----|------------------|------------------|------------------|------------------|-----------------|------------------|------|------------------|-----------------|------------------|------------------|------------------|------------------|----|
| 1  | 129.0659         | 65.0366          | 112.0393         | 56.5233          |                 |                  | Q    |                  |                 |                  |                  |                  |                  | 21 |
| 2  | 266.1248         | 133.5660         | 249.0982         | 125.0527         |                 |                  | H    | 2383.9410        | 1192.4741       | 2366.9145        | <b>1183.9609</b> | 2365.9305        | <b>1183.4689</b> | 20 |
| 3  | 397.1653         | 199.0863         | <b>380.1387</b>  | 190.5730         |                 |                  | M    | 2246.8821        | 1123.9447       | 2229.8556        | 1115.4314        | 2228.8715        | 1114.9394        | 19 |
| 4  | 659.2606         | 330.1339         | <b>642.2341</b>  | 321.6207         | 641.2500        | 321.1287         | D    | 2115.8416        | 1058.4244       | 2098.8151        | 1049.9112        | 2097.8311        | 1049.4192        | 18 |
| 5  | 746.2926         | 373.6500         | 729.2661         | <b>365.1367</b>  | 728.2821        | 364.6447         | S    | 1853.7463        | 927.3768        | 1836.7197        | 918.8635         | 1835.7357        | 918.3715         | 17 |
| 6  | 833.3247         | 417.1660         | 816.2981         | <b>408.6527</b>  | <b>815.3141</b> | 408.1607         | S    | 1766.7142        | 883.8608        | 1749.6877        | 875.3475         | 1748.7037        | 874.8555         | 16 |
| 7  | <b>934.3723</b>  | 467.6898         | <b>917.3458</b>  | 459.1765         | <b>916.3618</b> | 458.6845         | T    | 1679.6822        | 840.3447        | 1662.6557        | 831.8315         | 1661.6716        | 831.3395         | 15 |
| 8  | 1021.4044        | 511.2058         | 1004.3778        | 502.6926         | 1003.3938       | 502.2005         | S    | 1578.6345        | 789.8209        | 1561.6080        | 781.3076         | 1560.6240        | 780.8156         | 14 |
| 9  | <b>1092.4415</b> | <b>546.7244</b>  | 1075.4149        | <b>538.2111</b>  | 1074.4309       | <b>537.7191</b>  | A    | 1491.6025        | 746.3049        | 1474.5759        | 737.7916         | 1473.5919        | 737.2996         | 13 |
| 10 | <b>1163.4786</b> | <b>582.2429</b>  | <b>1146.4521</b> | <b>573.7297</b>  | 1145.4680       | <b>573.2377</b>  | A    | 1420.5654        | 710.7863        | <b>1403.5388</b> | 702.2731         | <b>1402.5548</b> | 701.7810         | 12 |
| 11 | <b>1250.5106</b> | <b>625.7590</b>  | <b>1233.4841</b> | <b>617.2457</b>  | 1232.5001       | <b>616.7537</b>  | S    | <b>1349.5283</b> | <b>675.2678</b> | <b>1332.5017</b> | <b>666.7545</b>  | 1331.5177        | 666.2625         | 11 |
| 12 | 1337.5427        | <b>669.2750</b>  | 1320.5161        | <b>660.7617</b>  | 1319.5321       | <b>660.2697</b>  | S    | <b>1262.4962</b> | 631.7518        | 1245.4697        | 623.2385         | 1244.4857        | 622.7465         | 10 |
| 13 | <b>1424.5747</b> | <b>712.7910</b>  | 1407.5481        | <b>704.2777</b>  | 1406.5641       | <b>703.7857</b>  | S    | <b>1175.4642</b> | 588.2357        | 1158.4377        | 579.7225         | 1157.4536        | 579.2305         | 9  |
| 14 | <b>1538.6176</b> | <b>769.8124</b>  | <b>1521.5911</b> | <b>761.2992</b>  | 1520.6071       | <b>760.8072</b>  | N    | <b>1088.4322</b> | 544.7197        | 1071.4056        | 536.2065         |                  |                  | 8  |
| 15 | 1701.6809        | <b>851.3441</b>  | 1684.6544        | 842.8308         | 1683.6704       | 842.3388         | Y    | <b>974.3893</b>  | 487.6983        | 957.3627         | 479.1850         |                  |                  | 7  |
| 16 | 1861.7116        | <b>931.3594</b>  | 1844.6850        | <b>922.8462</b>  | 1843.7010       | <b>922.3542</b>  | C    | <b>811.3259</b>  | <b>406.1666</b> | 794.2994         | 397.6533         |                  |                  | 6  |
| 17 | 1975.7545        | <b>988.3809</b>  | 1958.7280        | 979.8676         | 1957.7440       | 979.3756         | N    | <b>651.2953</b>  | 326.1513        | 634.2687         | 317.6380         |                  |                  | 5  |
| 18 | 2103.8131        | <b>1052.4102</b> | 2086.7865        | <b>1043.8969</b> | 2085.8025       | <b>1043.4049</b> | Q    | <b>537.2524</b>  | 269.1298        | <b>520.2258</b>  | <b>260.6165</b>  |                  |                  | 4  |
| 19 | 2234.8536        | <b>1117.9304</b> | 2217.8270        | <b>1109.4172</b> | 2216.8430       | <b>1108.9251</b> | M    | <b>409.1938</b>  | 205.1005        | 392.1672         | 196.5873         |                  |                  | 3  |
| 20 | 2365.8941        | <b>1183.4507</b> | 2348.8675        | <b>1174.9374</b> | 2347.8835       | <b>1174.4454</b> | M    | <b>278.1533</b>  | 139.5803        | 261.1267         | 131.0670         |                  |                  | 2  |
| 21 |                  |                  |                  |                  |                 |                  | K    | 147.1128         | 74.0600         | 130.0863         | 65.5468          |                  |                  | 1  |

Figure S3. Benzylacetamidyl ester of aspartic acid 14 of RNase A.



**MATRIX SCIENCE** Mascot Search Results

Peptide View

MS/MS Fragmentation of **CKPVNTFVHESLADVQAVCSQK**  
 Found in **gi|111141**, RNase A 27-150

Match to Query 2846: 2663.284386 from(888.768738,3+) intensity(452129.0000)  
 Title: NAM\_100-20.02562.02562.3  
 Data file NAM\_100-20.mgf

Click mouse within plot area to zoom in by factor of two about that point

Or, Plot from  to  Da

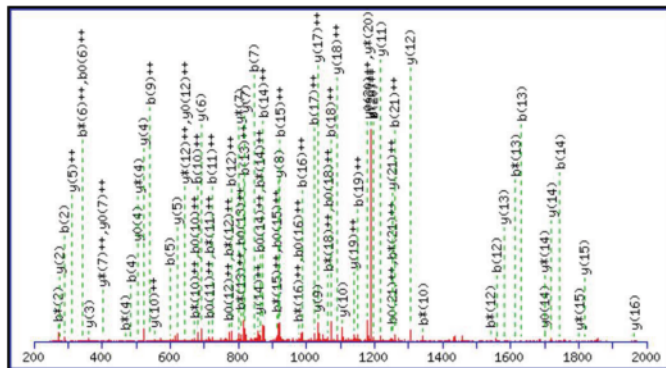

Monoisotopic mass of neutral peptide Mr(calc): 2663.2836  
 Fixed modifications: Carbamidomethyl (C)  
 Variable modifications: E10 : Raines\_147 (DE)  
 Ions Score: 62 Expect: 1.4e-006  
 Matches ( **Bold Red** ): 80/236 fragment ions using 179 most intense peaks

| #  | b                | b <sup>++</sup>  | b <sup>*</sup>   | b <sup>*++</sup> | b <sup>0</sup> | b <sup>0++</sup> | Seq. | y                | y <sup>++</sup>  | y <sup>*</sup>   | y <sup>*++</sup> | y <sup>0</sup>   | y <sup>0++</sup> | #  |
|----|------------------|------------------|------------------|------------------|----------------|------------------|------|------------------|------------------|------------------|------------------|------------------|------------------|----|
| 1  | 161.0379         | 81.0226          |                  |                  |                |                  | C    |                  |                  |                  |                  |                  |                  | 22 |
| 2  | <b>289.1329</b>  | 145.0701         | <b>272.1063</b>  | 136.5568         |                |                  | K    | 2504.2602        | <b>1252.6338</b> | 2487.2337        | 1244.1205        | 2486.2497        | 1243.6285        | 21 |
| 3  | 386.1857         | 193.5965         | 369.1591         | 185.0832         |                |                  | P    | 2376.1653        | <b>1188.5863</b> | 2359.1387        | <b>1180.0730</b> | 2358.1547        | <b>1179.5810</b> | 20 |
| 4  | <b>485.2541</b>  | 243.1307         | <b>468.2275</b>  | 234.6174         |                |                  | V    | 2279.1125        | <b>1140.0599</b> | 2262.0860        | 1131.5466        | 2261.1019        | 1131.0546        | 19 |
| 5  | <b>599.2970</b>  | 300.1521         | 582.2704         | 291.6389         |                |                  | N    | 2180.0441        | <b>1090.5257</b> | 2163.0175        | 1082.0124        | 2162.0335        | 1081.5204        | 18 |
| 6  | 700.3447         | 350.6760         | 683.3181         | <b>342.1627</b>  | 682.3341       | <b>341.6707</b>  | T    | 2066.0012        | <b>1033.5042</b> | 2048.9746        | 1024.9909        | 2047.9906        | 1024.4989        | 17 |
| 7  | <b>847.4131</b>  | 424.2102         | 830.3865         | 415.6969         | 829.4025       | 415.2049         | F    | <b>1964.9535</b> | 982.9804         | 1947.9269        | 974.4671         | 1946.9429        | 973.9751         | 16 |
| 8  | 946.4815         | 473.7444         | 929.4550         | 465.2311         | 928.4709       | 464.7391         | V    | <b>1817.8851</b> | 909.4462         | <b>1800.8585</b> | 900.9329         | 1799.8745        | 900.4409         | 15 |
| 9  | 1083.5404        | <b>542.2738</b>  | 1066.5139        | 533.7606         | 1065.5298      | 533.2686         | H    | <b>1718.8167</b> | <b>859.9120</b>  | <b>1701.7901</b> | 851.3987         | <b>1700.8061</b> | 850.9067         | 14 |
| 10 | 1359.6514        | <b>680.3294</b>  | <b>1342.6249</b> | <b>671.8161</b>  | 1341.6409      | <b>671.3241</b>  | E    | <b>1581.7577</b> | 791.3825         | 1564.7312        | 782.8692         | 1563.7472        | 782.3772         | 13 |
| 11 | 1446.6835        | <b>723.8454</b>  | 1429.6569        | <b>715.3321</b>  | 1428.6729      | <b>714.8401</b>  | S    | <b>1305.6467</b> | 653.3270         | 1288.6202        | <b>644.8137</b>  | 1287.6362        | <b>644.3217</b>  | 12 |
| 12 | <b>1559.7675</b> | <b>780.3874</b>  | <b>1542.7410</b> | <b>771.8741</b>  | 1541.7570      | <b>771.3821</b>  | L    | <b>1218.6147</b> | 609.8110         | 1201.5882        | 601.2977         | 1200.6041        | 600.8057         | 11 |
| 13 | <b>1630.8046</b> | <b>815.9060</b>  | <b>1613.7781</b> | <b>807.3927</b>  | 1612.7941      | <b>806.9007</b>  | A    | <b>1105.5306</b> | <b>553.2690</b>  | 1088.5041        | 544.7557         | 1087.5201        | 544.2637         | 10 |
| 14 | <b>1745.8316</b> | <b>873.4194</b>  | 1728.8050        | <b>864.9062</b>  | 1727.8210      | <b>864.4141</b>  | D    | <b>1034.4935</b> | 517.7504         | 1017.4670        | 509.2371         | 1016.4830        | 508.7451         | 9  |
| 15 | 1844.9000        | <b>922.9536</b>  | 1827.8734        | <b>914.4404</b>  | 1826.8894      | <b>913.9483</b>  | V    | <b>919.4666</b>  | 460.2369         | 902.4400         | 451.7237         | 901.4560         | 451.2316         | 8  |
| 16 | 1972.9586        | <b>986.9829</b>  | 1955.9320        | <b>978.4696</b>  | 1954.9480      | <b>977.9776</b>  | Q    | <b>820.3982</b>  | 410.7027         | <b>803.3716</b>  | <b>402.1894</b>  | 802.3876         | <b>401.6974</b>  | 7  |
| 17 | 2043.9957        | <b>1022.5015</b> | 2026.9691        | 1013.9882        | 2025.9851      | 1013.4962        | A    | <b>692.3396</b>  | 346.6734         | 675.3130         | 338.1602         | 674.3290         | 337.6681         | 6  |
| 18 | 2143.0641        | <b>1072.0357</b> | 2126.0375        | <b>1063.5224</b> | 2125.0535      | <b>1063.0304</b> | V    | <b>621.3025</b>  | <b>311.1549</b>  | 604.2759         | 302.6416         | 603.2919         | 302.1496         | 5  |
| 19 | 2303.0947        | <b>1152.0510</b> | 2286.0682        | 1143.5377        | 2285.0842      | 1143.0457        | C    | <b>522.2341</b>  | 261.6207         | <b>505.2075</b>  | 253.1074         | <b>504.2235</b>  | 252.6154         | 4  |
| 20 | 2390.1268        | <b>1195.5670</b> | 2373.1002        | 1187.0537        | 2372.1162      | 1186.5617        | S    | <b>362.2034</b>  | 181.6053         | 345.1769         | 173.0921         | 344.1928         | 172.6001         | 3  |
| 21 | 2518.1853        | <b>1259.5963</b> | 2501.1588        | <b>1251.0830</b> | 2500.1748      | <b>1250.5910</b> | Q    | <b>275.1714</b>  | 138.0893         | 258.1448         | 129.5761         |                  |                  | 2  |
| 22 |                  |                  |                  |                  |                |                  | K    | 147.1128         | 74.0600          | 130.0863         | 65.5468          |                  |                  | 1  |

**Figure S4.** Benzylacetamidyl ester of glutamic acid 49 of RNase A.



**MATRIX SCIENCE** Mascot Search Results

Peptide View

MS/MS Fragmentation of **HIIVACEGNPYVPVHFDASV**  
 Found in **gi|111141**, RNase A 27-150

Match to Query 2249: 2370.148278 from(791.056702,3+) intensity(68902.3000)  
 Title: NAM\_100-20.02716.02716.3  
 Data file NAM\_100-20.mgf

Click mouse within plot area to zoom in by factor of two about that point

Or, Plot from  to  Da

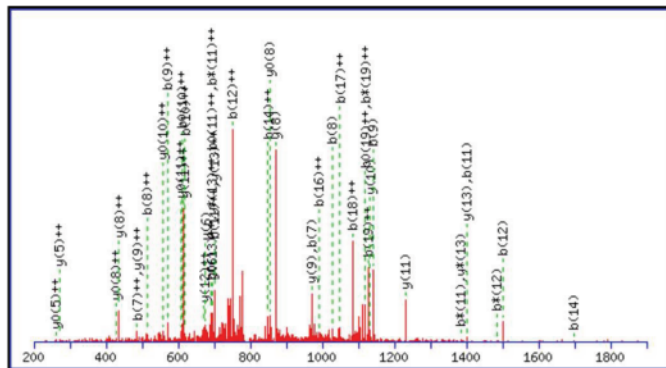

Monoisotopic mass of neutral peptide Mr(calc): 2370.1467  
 Fixed modifications: Carbamidomethyl (C)  
 Variable modifications:  
**E7** : Raines\_147 (DE)  
 Ions Score: 27 Expect: 0.0045  
 Matches ( **Bold Red** ): 45/176 fragment ions using 134 most intense peaks

| #  | b                | b <sup>++</sup>  | b <sup>*</sup>   | b <sup>*++</sup> | b <sup>0</sup> | b <sup>0++</sup> | Seq.     | y                | y <sup>++</sup> | y <sup>*</sup>   | y <sup>*++</sup> | y <sup>0</sup>  | y <sup>0++</sup> | #  |
|----|------------------|------------------|------------------|------------------|----------------|------------------|----------|------------------|-----------------|------------------|------------------|-----------------|------------------|----|
| 1  | 138.0662         | 69.5367          |                  |                  |                |                  | H        |                  |                 |                  |                  |                 |                  | 20 |
| 2  | 251.1503         | 126.0788         |                  |                  |                |                  | I        | 2234.0951        | 1117.5512       | 2217.0685        | 1109.0379        | 2216.0845       | 1108.5459        | 19 |
| 3  | 364.2343         | 182.6208         |                  |                  |                |                  | I        | 2121.0110        | 1061.0091       | 2103.9844        | 1052.4959        | 2103.0004       | 1052.0039        | 18 |
| 4  | 463.3027         | 232.1550         |                  |                  |                |                  | V        | 2007.9269        | 1004.4671       | 1990.9004        | 995.9538         | 1989.9164       | 995.4618         | 17 |
| 5  | 534.3398         | 267.6736         |                  |                  |                |                  | A        | 1908.8585        | 954.9329        | 1891.8320        | 946.4196         | 1890.8480       | 945.9276         | 16 |
| 6  | <b>694.3705</b>  | 347.6889         |                  |                  |                |                  | C        | 1837.8214        | 919.4143        | 1820.7949        | 910.9011         | 1819.8108       | 910.4091         | 15 |
| 7  | <b>970.4815</b>  | <b>485.7444</b>  |                  |                  | 952.4709       | 476.7391         | <b>E</b> | 1677.7908        | 839.3990        | 1660.7642        | 830.8857         | 1659.7802       | 830.3937         | 14 |
| 8  | <b>1027.5030</b> | <b>514.2551</b>  |                  |                  | 1009.4924      | 505.2498         | G        | <b>1401.6797</b> | <b>701.3435</b> | <b>1384.6532</b> | <b>692.8302</b>  | 1383.6692       | <b>692.3382</b>  | 13 |
| 9  | <b>1141.5459</b> | <b>571.2766</b>  | 1124.5193        | 562.7633         | 1123.5353      | 562.2713         | N        | 1344.6583        | <b>672.8328</b> | 1327.6317        | 664.3195         | 1326.6477       | 663.8275         | 12 |
| 10 | 1238.5987        | <b>619.8030</b>  | 1221.5721        | 611.2897         | 1220.5881      | <b>610.7977</b>  | P        | <b>1230.6154</b> | <b>615.8113</b> |                  |                  | 1212.6048       | <b>606.8060</b>  | 11 |
| 11 | <b>1401.6620</b> | <b>701.3346</b>  | <b>1384.6354</b> | <b>692.8214</b>  | 1383.6514      | <b>692.3294</b>  | Y        | <b>1133.5626</b> | 567.2849        |                  |                  | 1115.5520       | <b>558.2796</b>  | 10 |
| 12 | <b>1500.7304</b> | <b>750.8688</b>  | <b>1483.7039</b> | 742.3556         | 1482.7198      | 741.8636         | V        | <b>970.4993</b>  | <b>485.7533</b> |                  |                  | 952.4887        | 476.7480         | 9  |
| 13 | 1597.7832        | 799.3952         | 1580.7566        | 790.8819         | 1579.7726      | 790.3899         | P        | <b>871.4308</b>  | <b>436.2191</b> |                  |                  | <b>853.4203</b> | <b>427.2138</b>  | 8  |
| 14 | <b>1696.8516</b> | <b>848.9294</b>  | 1679.8250        | 840.4162         | 1678.8410      | 839.9241         | V        | 774.3781         | 387.6927        |                  |                  | 756.3675        | 378.6874         | 7  |
| 15 | 1833.9105        | 917.4589         | 1816.8839        | 908.9456         | 1815.8999      | 908.4536         | H        | <b>675.3097</b>  | 338.1585        |                  |                  | 657.2991        | 329.1532         | 6  |
| 16 | 1980.9789        | <b>990.9931</b>  | 1963.9524        | 982.4798         | 1962.9683      | 981.9878         | F        | 538.2508         | <b>269.6290</b> |                  |                  | 520.2402        | <b>260.6237</b>  | 5  |
| 17 | 2096.0059        | <b>1048.5066</b> | 2078.9793        | 1039.9933        | 2077.9953      | 1039.5013        | D        | 391.1823         | 196.0948        |                  |                  | 373.1718        | 187.0895         | 4  |
| 18 | 2167.0430        | <b>1084.0251</b> | 2150.0164        | 1075.5118        | 2149.0324      | 1075.0198        | A        | 276.1554         | 138.5813        |                  |                  | 258.1448        | 129.5761         | 3  |
| 19 | 2254.0750        | <b>1127.5411</b> | 2237.0484        | <b>1119.0279</b> | 2236.0644      | <b>1118.5359</b> | S        | 205.1183         | 103.0628        |                  |                  | 187.1077        | 94.0575          | 2  |
| 20 |                  |                  |                  |                  |                |                  | V        | 118.0863         | 59.5468         |                  |                  |                 |                  | 1  |

**Figure S5.** Benzylacetamidyl ester of glutamic acid 111 of RNase A.

**MATRIX SCIENCE** Mascot Search Results

Peptide View

MS/MS Fragmentation of **HIIVACEGNPYVPVHFDASV**  
 Found in **gi|111141**, RNase A 27-150

Match to Query 2252: 2370.152121 from(791.057983,3+) intensity(3214070.0000)  
 Title: NAM\_100-20.02893.02893.3  
 Data file NAM\_100-20.mgf

Click mouse within plot area to zoom in by factor of two about that point

Or, Plot from  to  Da

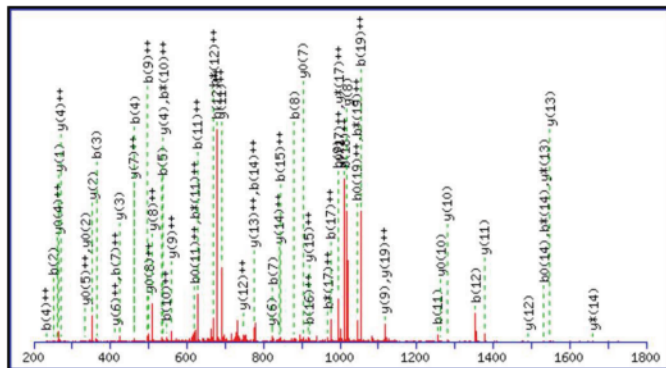

Monoisotopic mass of neutral peptide Mr(calc): 2370.1467  
 Fixed modifications: Carbamidomethyl (C)  
 Variable modifications:  
**C-term:** Raines\_147\_term (Protein C-term)  
 Ions Score: 56 Expect: 5.9e-006  
 Matches ( **Bold Red** ): 62/176 fragment ions using 135 most intense peaks

| #  | b                | b <sup>++</sup>  | b <sup>*</sup>   | b <sup>*++</sup> | b <sup>0</sup>   | b <sup>0++</sup> | Seq. | y                | y <sup>++</sup>  | y <sup>*</sup>   | y <sup>*++</sup> | y <sup>0</sup>   | y <sup>0++</sup> | #  |
|----|------------------|------------------|------------------|------------------|------------------|------------------|------|------------------|------------------|------------------|------------------|------------------|------------------|----|
| 1  | 138.0662         | 69.5367          |                  |                  |                  |                  | H    |                  |                  |                  |                  |                  |                  | 20 |
| 2  | <b>251.1503</b>  | 126.0788         |                  |                  |                  |                  | I    | 2234.0950        | <b>1117.5512</b> | 2217.0685        | 1109.0379        | 2216.0845        | 1108.5459        | 19 |
| 3  | <b>364.2343</b>  | 182.6208         |                  |                  |                  |                  | I    | 2121.0110        | 1061.0091        | 2103.9844        | 1052.4959        | 2103.0004        | 1052.0038        | 18 |
| 4  | <b>463.3027</b>  | <b>232.1550</b>  |                  |                  |                  |                  | V    | 2007.9269        | 1004.4671        | 1990.9004        | <b>995.9538</b>  | 1989.9164        | <b>995.4618</b>  | 17 |
| 5  | <b>534.3398</b>  | 267.6736         |                  |                  |                  |                  | A    | 1908.8585        | 954.9329         | 1891.8320        | 946.4196         | 1890.8479        | 945.9276         | 16 |
| 6  | 694.3705         | 347.6889         |                  |                  |                  |                  | C    | 1837.8214        | <b>919.4143</b>  | 1820.7948        | 910.9011         | 1819.8108        | 910.4091         | 15 |
| 7  | <b>823.4131</b>  | <b>412.2102</b>  |                  |                  | 805.4025         | 403.2049         | E    | 1677.7907        | <b>839.3990</b>  | <b>1660.7642</b> | 830.8857         | 1659.7802        | 830.3937         | 14 |
| 8  | <b>880.4346</b>  | 440.7209         |                  |                  | 862.4240         | 431.7156         | G    | <b>1548.7481</b> | <b>774.8777</b>  | <b>1531.7216</b> | 766.3644         | 1530.7376        | 765.8724         | 13 |
| 9  | <b>994.4775</b>  | <b>497.7424</b>  | 977.4509         | 489.2291         | 976.4669         | 488.7371         | N    | <b>1491.7267</b> | <b>746.3670</b>  | 1474.7001        | 737.8537         | 1473.7161        | 737.3617         | 12 |
| 10 | 1091.5302        | <b>546.2688</b>  | 1074.5037        | <b>537.7555</b>  | 1073.5197        | 537.2635         | P    | <b>1377.6838</b> | <b>689.3455</b>  |                  |                  | 1359.6732        | 680.3402         | 11 |
| 11 | <b>1254.5936</b> | <b>627.8004</b>  | 1237.5670        | <b>619.2871</b>  | 1236.5830        | <b>618.7951</b>  | Y    | <b>1280.6310</b> | 640.8191         |                  |                  | <b>1262.6204</b> | 631.8139         | 10 |
| 12 | <b>1353.6620</b> | <b>677.3346</b>  | 1336.6354        | <b>668.8214</b>  | 1335.6514        | 668.3293         | V    | <b>1117.5677</b> | <b>559.2875</b>  |                  |                  | 1099.5571        | 550.2822         | 9  |
| 13 | 1450.7147        | 725.8610         | 1433.6882        | 717.3477         | 1432.7042        | 716.8557         | P    | <b>1018.4992</b> | <b>509.7533</b>  |                  |                  | 1000.4887        | <b>500.7480</b>  | 8  |
| 14 | 1549.7832        | <b>775.3952</b>  | <b>1532.7566</b> | 766.8819         | <b>1531.7726</b> | 766.3899         | V    | 921.4465         | <b>461.2269</b>  |                  |                  | <b>903.4359</b>  | 452.2216         | 7  |
| 15 | 1686.8421        | <b>843.9247</b>  | 1669.8155        | 835.4114         | 1668.8315        | 834.9194         | H    | <b>822.3781</b>  | <b>411.6927</b>  |                  |                  | 804.3675         | 402.6874         | 6  |
| 16 | 1833.9105        | <b>917.4589</b>  | 1816.8839        | 908.9456         | 1815.8999        | 908.4536         | F    | 685.3192         | 343.1632         |                  |                  | 667.3086         | <b>334.1579</b>  | 5  |
| 17 | 1948.9374        | <b>974.9724</b>  | 1931.9109        | <b>966.4591</b>  | 1930.9269        | 965.9671         | D    | <b>538.2507</b>  | <b>269.6290</b>  |                  |                  | 520.2402         | <b>260.6237</b>  | 4  |
| 18 | 2019.9745        | <b>1010.4909</b> | 2002.9480        | 1001.9776        | 2001.9640        | 1001.4856        | A    | <b>423.2238</b>  | 212.1155         |                  |                  | 405.2132         | 203.1103         | 3  |
| 19 | 2107.0066        | <b>1054.0069</b> | 2089.9800        | <b>1045.4936</b> | 2088.9960        | <b>1045.0016</b> | S    | <b>352.1867</b>  | 176.5970         |                  |                  | <b>334.1761</b>  | 167.5917         | 2  |
| 20 |                  |                  |                  |                  |                  |                  | V    | <b>265.1547</b>  | 133.0810         |                  |                  |                  |                  | 1  |

**Figure S6.** Benzylacetamidyl ester of valine 124 at the C terminus of RNase A.

**MATRIX SCIENCE** Mascot Search Results

Peptide View

MS/MS Fragmentation of **QHMDSSTSAASSSNYCQMMK**  
 Found in **gi|111141**, RNase A 27-150

Match to Query 3621: 2527.980063 from(843.667297,3+) intensity(103558.0000)  
 Title: NAM\_FL-5-7.02017.02017.3  
 Data file NAM\_FL-5-7.mgf

Click mouse within plot area to zoom in by factor of two about that point

Or, Plot from  to  Da

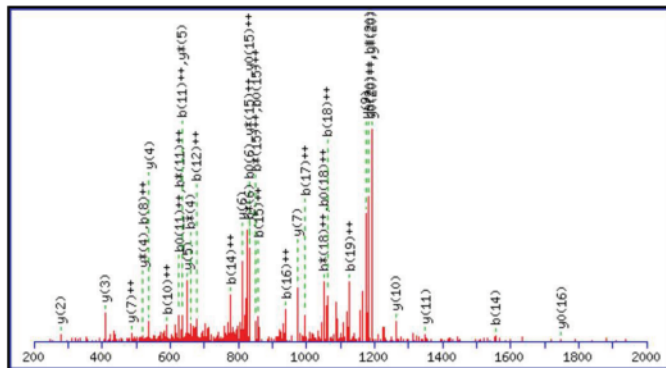

Monoisotopic mass of neutral peptide Mr(calc): 2527.9865  
 Fixed modifications: Carbamidomethyl (C)  
 Variable modifications: Fluorene (DE)  
**D4** : Fluorene (DE)  
 Ions Score: 41 Expect: 4.3e-006  
 Matches ( **Bold Red** ): 40/218 fragment ions using 56 most intense peaks

| #  | b                | b <sup>++</sup>  | b*              | b <sup>*++</sup> | b <sup>0</sup>  | b <sup>0++</sup> | Seq.     | y                | y <sup>++</sup> | y*              | y <sup>*++</sup> | y <sup>0</sup>   | y <sup>0++</sup> | #  |
|----|------------------|------------------|-----------------|------------------|-----------------|------------------|----------|------------------|-----------------|-----------------|------------------|------------------|------------------|----|
| 1  | 129.0659         | 65.0366          | 112.0393        | 56.5233          |                 |                  | Q        |                  |                 |                 |                  |                  |                  | 21 |
| 2  | 266.1248         | 133.5660         | 249.0982        | 125.0527         |                 |                  | H        | 2400.9352        | 1200.9712       | 2383.9087       | <b>1192.4580</b> | 2382.9246        | <b>1191.9660</b> | 20 |
| 3  | 397.1653         | 199.0863         | 380.1387        | 190.5730         |                 |                  | M        | 2263.8763        | 1132.4418       | 2246.8497       | 1123.9285        | 2245.8657        | 1123.4365        | 19 |
| 4  | 676.2548         | 338.6310         | <b>659.2283</b> | 330.1178         | 658.2442        | 329.6258         | <b>D</b> | 2132.8358        | 1066.9215       | 2115.8093       | 1058.4083        | 2114.8252        | 1057.9163        | 18 |
| 5  | 763.2868         | 382.1471         | 746.2603        | 373.6338         | 745.2763        | 373.1418         | S        | 1853.7463        | 927.3768        | 1836.7197       | 918.8635         | 1835.7357        | 918.3715         | 17 |
| 6  | 850.3189         | 425.6631         | <b>833.2923</b> | 417.1498         | <b>832.3083</b> | 416.6578         | S        | 1766.7142        | 883.8608        | 1749.6877       | 875.3475         | <b>1748.7037</b> | 874.8555         | 16 |
| 7  | 951.3665         | 476.1869         | 934.3400        | 467.6736         | 933.3560        | 467.1816         | T        | 1679.6822        | 840.3447        | 1662.6557       | <b>831.8315</b>  | 1661.6716        | <b>831.3395</b>  | 15 |
| 8  | 1038.3986        | <b>519.7029</b>  | 1021.3720       | 511.1896         | 1020.3880       | 510.6976         | S        | 1578.6345        | 789.8209        | 1561.6080       | 781.3076         | 1560.6240        | 780.8156         | 14 |
| 9  | 1109.4357        | 555.2215         | 1092.4091       | 546.7082         | 1091.4251       | 546.2162         | A        | 1491.6025        | 746.3049        | 1474.5759       | 737.7916         | 1473.5919        | 737.2996         | 13 |
| 10 | 1180.4728        | <b>590.7400</b>  | 1163.4462       | 582.2268         | 1162.4622       | 581.7348         | A        | 1420.5654        | 710.7863        | 1403.5388       | 702.2731         | 1402.5548        | 701.7810         | 12 |
| 11 | 1267.5048        | <b>634.2560</b>  | 1250.4783       | <b>625.7428</b>  | 1249.4943       | <b>625.2508</b>  | S        | <b>1349.5283</b> | 675.2678        | 1332.5017       | 666.7545         | 1331.5177        | 666.2625         | 11 |
| 12 | 1354.5368        | <b>677.7721</b>  | 1337.5103       | 669.2588         | 1336.5263       | 668.7668         | S        | <b>1262.4962</b> | 631.7518        | 1245.4697       | 623.2385         | 1244.4857        | 622.7465         | 10 |
| 13 | 1441.5689        | 721.2881         | 1424.5423       | 712.7748         | 1423.5583       | 712.2828         | S        | <b>1175.4642</b> | 588.2357        | 1158.4377       | 579.7225         | 1157.4536        | 579.2305         | 9  |
| 14 | <b>1555.6118</b> | <b>778.3095</b>  | 1538.5853       | 769.7963         | 1537.6012       | 769.3043         | N        | 1088.4322        | 544.7197        | 1071.4056       | 536.2065         |                  |                  | 8  |
| 15 | 1718.6751        | <b>859.8412</b>  | 1701.6486       | <b>851.3279</b>  | 1700.6646       | <b>850.8359</b>  | Y        | <b>974.3893</b>  | <b>487.6983</b> | 957.3627        | 479.1850         |                  |                  | 7  |
| 16 | 1878.7058        | <b>939.8565</b>  | 1861.6792       | 931.3433         | 1860.6952       | 930.8512         | C        | <b>811.3259</b>  | 406.1666        | 794.2994        | 397.6533         |                  |                  | 6  |
| 17 | 1992.7487        | <b>996.8780</b>  | 1975.7222       | 988.3647         | 1974.7381       | 987.8727         | N        | <b>651.2953</b>  | 326.1513        | <b>634.2687</b> | 317.6380         |                  |                  | 5  |
| 18 | 2120.8073        | <b>1060.9073</b> | 2103.7807       | <b>1052.3940</b> | 2102.7967       | <b>1051.9020</b> | Q        | <b>537.2524</b>  | 269.1298        | <b>520.2258</b> | 260.6165         |                  |                  | 4  |
| 19 | 2251.8478        | <b>1126.4275</b> | 2234.8212       | 1117.9142        | 2233.8372       | 1117.4222        | M        | <b>409.1938</b>  | 205.1005        | 392.1672        | 196.5873         |                  |                  | 3  |
| 20 | 2382.8883        | <b>1191.9478</b> | 2365.8617       | <b>1183.4345</b> | 2364.8777       | <b>1182.9425</b> | M        | <b>278.1533</b>  | 139.5803        | 261.1267        | 131.0670         |                  |                  | 2  |
| 21 |                  |                  |                 |                  |                 |                  | K        | 147.1128         | 74.0600         | 130.0863        | 65.5468          |                  |                  | 1  |

Figure S7. Fluorenyl ester of aspartic acid 14 of RNase A.

**MASCOT** Mascot Search Results

Peptide View

MS/MS Fragmentation of **CKPVNTFVHESLADVQAVCSQK**  
 Found in **gi|111141**, RNase A 27-150

Match to Query 3883: 2680.274742 from(894.432190,3+) intensity(128761.0000)  
 Title: NAM\_FL-5-7.03167.03167.3  
 Data file NAM\_FL-5-7.mgf

Click mouse within plot area to zoom in by factor of two about that point

Or, Plot from  to  Da

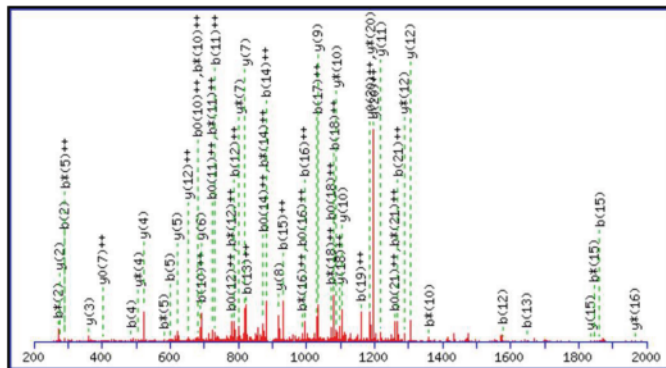

Monoisotopic mass of neutral peptide Mr(calc): 2680.2778  
 Fixed modifications: Carbamidomethyl (C)  
 Variable modifications: E10 : Fluorene (DE)  
 Ions Score: 40 Expect: 0.00014  
 Matches ( **Bold Red** ): 59/236 fragment ions using 121 most intense peaks

| #  | b                | b <sup>++</sup>  | b <sup>*</sup>   | b <sup>*++</sup> | b <sup>0</sup> | b <sup>0++</sup> | Seq. | y                | y <sup>++</sup>  | y <sup>*</sup>   | y <sup>*++</sup> | y <sup>0</sup> | y <sup>0++</sup> | #  |
|----|------------------|------------------|------------------|------------------|----------------|------------------|------|------------------|------------------|------------------|------------------|----------------|------------------|----|
| 1  | 161.0379         | 81.0226          |                  |                  |                |                  | C    |                  |                  |                  |                  |                |                  | 22 |
| 2  | <b>289.1329</b>  | 145.0701         | <b>272.1063</b>  | 136.5568         |                |                  | K    | 2521.2544        | 1261.1308        | 2504.2279        | 1252.6176        | 2503.2438      | 1252.1256        | 21 |
| 3  | 386.1857         | 193.5965         | 369.1591         | 185.0832         |                |                  | P    | 2393.1595        | <b>1197.0834</b> | 2376.1329        | <b>1188.5701</b> | 2375.1489      | <b>1188.0781</b> | 20 |
| 4  | <b>485.2541</b>  | 243.1307         | 468.2275         | 234.6174         |                |                  | V    | 2296.1067        | 1148.5570        | 2279.0801        | 1140.0437        | 2278.0961      | 1139.5517        | 19 |
| 5  | <b>599.2970</b>  | 300.1521         | <b>582.2704</b>  | <b>291.6389</b>  |                |                  | N    | 2197.0383        | <b>1099.0228</b> | 2180.0117        | 1090.5095        | 2179.0277      | 1090.0175        | 18 |
| 6  | 700.3447         | 350.6760         | 683.3181         | 342.1627         | 682.3341       | 341.6707         | T    | 2082.9953        | 1042.0013        | 2065.9688        | 1033.4880        | 2064.9848      | 1032.9960        | 17 |
| 7  | 847.4131         | 424.2102         | 830.3865         | 415.6969         | 829.4025       | 415.2049         | F    | 1981.9477        | 991.4775         | <b>1964.9211</b> | 982.9642         | 1963.9371      | 982.4722         | 16 |
| 8  | 946.4815         | 473.7444         | 929.4550         | 465.2311         | 928.4709       | 464.7391         | V    | <b>1834.8793</b> | 917.9433         | 1817.8527        | 909.4300         | 1816.8687      | 908.9380         | 15 |
| 9  | 1083.5404        | 542.2738         | 1066.5139        | 533.7606         | 1065.5298      | 533.2686         | H    | 1735.8108        | 868.4091         | 1718.7843        | 859.8958         | 1717.8003      | 859.4038         | 14 |
| 10 | 1376.6456        | <b>688.8264</b>  | <b>1359.6191</b> | <b>680.3132</b>  | 1358.6350      | <b>679.8212</b>  | E    | 1598.7519        | 799.8796         | 1581.7254        | 791.3663         | 1580.7414      | 790.8743         | 13 |
| 11 | 1463.6776        | <b>732.3425</b>  | 1446.6511        | <b>723.8292</b>  | 1445.6671      | <b>723.3372</b>  | S    | <b>1305.6467</b> | <b>653.3270</b>  | <b>1288.6202</b> | 644.8137         | 1287.6362      | 644.3217         | 12 |
| 12 | <b>1576.7617</b> | <b>788.8845</b>  | 1559.7352        | <b>780.3712</b>  | 1558.7511      | <b>779.8792</b>  | L    | <b>1218.6147</b> | 609.8110         | 1201.5882        | 601.2977         | 1200.6041      | 600.8057         | 11 |
| 13 | <b>1647.7988</b> | <b>824.4030</b>  | 1630.7723        | 815.8898         | 1629.7883      | 815.3978         | A    | <b>1105.5306</b> | 553.2690         | <b>1088.5041</b> | 544.7557         | 1087.5201      | 544.2637         | 10 |
| 14 | 1762.8258        | <b>881.9165</b>  | 1745.7992        | <b>873.4032</b>  | 1744.8152      | <b>872.9112</b>  | D    | <b>1034.4935</b> | 517.7504         | 1017.4670        | 509.2371         | 1016.4830      | 508.7451         | 9  |
| 15 | <b>1861.8942</b> | <b>931.4507</b>  | <b>1844.8676</b> | 922.9375         | 1843.8836      | 922.4454         | V    | <b>919.4666</b>  | 460.2369         | 902.4400         | 451.7237         | 901.4560       | 451.2316         | 8  |
| 16 | 1989.9528        | <b>995.4800</b>  | 1972.9262        | <b>986.9667</b>  | 1971.9422      | <b>986.4747</b>  | Q    | <b>820.3982</b>  | 410.7027         | <b>803.3716</b>  | 402.1894         | 802.3876       | <b>401.6974</b>  | 7  |
| 17 | 2060.9899        | <b>1030.9986</b> | 2043.9633        | 1022.4853        | 2042.9793      | 1021.9933        | A    | <b>692.3396</b>  | 346.6734         | 675.3130         | 338.1602         | 674.3290       | 337.6681         | 6  |
| 18 | 2160.0583        | <b>1080.5328</b> | 2143.0317        | <b>1072.0195</b> | 2142.0477      | <b>1071.5275</b> | V    | <b>621.3025</b>  | 311.1549         | 604.2759         | 302.6416         | 603.2919       | 302.1496         | 5  |
| 19 | 2320.0889        | <b>1160.5481</b> | 2303.0624        | 1152.0348        | 2302.0784      | 1151.5428        | C    | <b>522.2341</b>  | 261.6207         | <b>505.2075</b>  | 253.1074         | 504.2235       | 252.6154         | 4  |
| 20 | 2407.1210        | 1204.0641        | 2390.0944        | 1195.5508        | 2389.1104      | 1195.0588        | S    | <b>362.2034</b>  | 181.6053         | 345.1769         | 173.0921         | 344.1928       | 172.6001         | 3  |
| 21 | 2535.1795        | <b>1268.0934</b> | 2518.1530        | <b>1259.5801</b> | 2517.1690      | <b>1259.0881</b> | Q    | <b>275.1714</b>  | 138.0893         | 258.1448         | 129.5761         |                |                  | 2  |
| 22 |                  |                  |                  |                  |                |                  | K    | 147.1128         | 74.0600          | 130.0863         | 65.5468          |                |                  | 1  |

**Figure S8.** Fluorenyl ester of glutamic acid 49 of RNase A.



**MASCOT** Mascot Search Results

Peptide View

MS/MS Fragmentation of **HIIVACEGNPYVPVHFDASV**  
 Found in **gij111141**, RNase A 27-150

Match to Query 3066: 2387.140830 from(796.720886,3+) intensity(37095.2000)  
 Title: NAM\_FL-5-7.03000.03000.3  
 Data file NAM\_FL-5-7.mgf

Click mouse within plot area to zoom in by factor of two about that point

Or, Plot from  to  Da

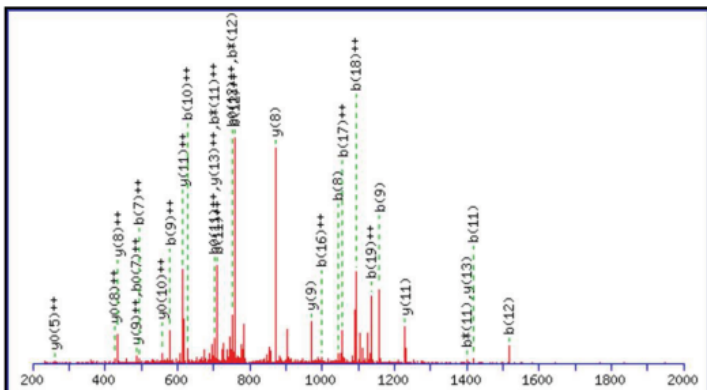

Monoisotopic mass of neutral peptide Mr(calc): 2387.1409

Fixed modifications: Carbamidomethyl (C)

Variable modifications:

**E7** : Fluorene (DE)

Ions Score: 33 Expect: 0.001

Matches ( **Bold Red** ): 30/176 fragment ions using 68 most intense peaks

| #  | b                | b <sup>++</sup>  | b <sup>*</sup>   | b <sup>*++</sup> | b <sup>0</sup> | b <sup>0++</sup> | Seq.     | y                | y <sup>++</sup> | y <sup>*</sup> | y <sup>*++</sup> | y <sup>0</sup> | y <sup>0++</sup> | #  |
|----|------------------|------------------|------------------|------------------|----------------|------------------|----------|------------------|-----------------|----------------|------------------|----------------|------------------|----|
| 1  | 138.0662         | 69.5367          |                  |                  |                |                  | H        |                  |                 |                |                  |                |                  | 20 |
| 2  | 251.1503         | 126.0788         |                  |                  |                |                  | I        | 2251.0892        | 1126.0483       | 2234.0627      | 1117.5350        | 2233.0787      | 1117.0430        | 19 |
| 3  | 364.2343         | 182.6208         |                  |                  |                |                  | I        | 2138.0052        | 1069.5062       | 2120.9786      | 1060.9930        | 2119.9946      | 1060.5009        | 18 |
| 4  | 463.3027         | 232.1550         |                  |                  |                |                  | V        | 2024.9211        | 1012.9642       | 2007.8946      | 1004.4509        | 2006.9106      | 1003.9589        | 17 |
| 5  | 534.3398         | 267.6736         |                  |                  |                |                  | A        | 1925.8527        | 963.4300        | 1908.8262      | 954.9167         | 1907.8421      | 954.4247         | 16 |
| 6  | 694.3705         | 347.6889         |                  |                  |                |                  | C        | 1854.8156        | 927.9114        | 1837.7890      | 919.3982         | 1836.8050      | 918.9062         | 15 |
| 7  | 987.4757         | <b>494.2415</b>  |                  |                  | 969.4651       | <b>485.2362</b>  | <b>E</b> | 1694.7849        | 847.8961        | 1677.7584      | 839.3828         | 1676.7744      | 838.8908         | 14 |
| 8  | <b>1044.4972</b> | 522.7522         |                  |                  | 1026.4866      | 513.7469         | G        | <b>1401.6797</b> | <b>701.3435</b> | 1384.6532      | 692.8302         | 1383.6692      | 692.3382         | 13 |
| 9  | <b>1158.5401</b> | <b>579.7737</b>  | 1141.5135        | 571.2604         | 1140.5295      | 570.7684         | N        | 1344.6583        | 672.8328        | 1327.6317      | 664.3195         | 1326.6477      | 663.8275         | 12 |
| 10 | 1255.5928        | <b>628.3001</b>  | 1238.5663        | 619.7868         | 1237.5823      | 619.2948         | P        | <b>1230.6154</b> | <b>615.8113</b> |                |                  | 1212.6048      | 606.8060         | 11 |
| 11 | <b>1418.6562</b> | <b>709.8317</b>  | <b>1401.6296</b> | <b>701.3185</b>  | 1400.6456      | <b>700.8264</b>  | Y        | 1133.5626        | 567.2849        |                |                  | 1115.5520      | <b>558.2796</b>  | 10 |
| 12 | <b>1517.7246</b> | <b>759.3659</b>  | 1500.6980        | <b>750.8527</b>  | 1499.7140      | <b>750.3607</b>  | V        | <b>970.4993</b>  | <b>485.7533</b> |                |                  | 952.4887       | 476.7480         | 9  |
| 13 | 1614.7774        | 807.8923         | 1597.7508        | 799.3790         | 1596.7668      | 798.8870         | P        | <b>871.4308</b>  | <b>436.2191</b> |                |                  | 853.4203       | <b>427.2138</b>  | 8  |
| 14 | 1713.8458        | 857.4265         | 1696.8192        | 848.9132         | 1695.8352      | 848.4212         | V        | 774.3781         | 387.6927        |                |                  | 756.3675       | 378.6874         | 7  |
| 15 | 1850.9047        | 925.9560         | 1833.8781        | 917.4427         | 1832.8941      | 916.9507         | H        | 675.3097         | 338.1585        |                |                  | 657.2991       | 329.1532         | 6  |
| 16 | 1997.9731        | <b>999.4902</b>  | 1980.9465        | 990.9769         | 1979.9625      | 990.4849         | F        | 538.2508         | 269.6290        |                |                  | 520.2402       | <b>260.6237</b>  | 5  |
| 17 | 2113.0000        | <b>1057.0037</b> | 2095.9735        | 1048.4904        | 2094.9895      | 1047.9984        | D        | 391.1823         | 196.0948        |                |                  | 373.1718       | 187.0895         | 4  |
| 18 | 2184.0372        | <b>1092.5222</b> | 2167.0106        | 1084.0089        | 2166.0266      | 1083.5169        | A        | 276.1554         | 138.5813        |                |                  | 258.1448       | 129.5761         | 3  |
| 19 | 2271.0692        | <b>1136.0382</b> | 2254.0426        | 1127.5250        | 2253.0586      | 1127.0329        | S        | 205.1183         | 103.0628        |                |                  | 187.1077       | 94.0575          | 2  |
| 20 |                  |                  |                  |                  |                |                  | V        | 118.0863         | 59.5468         |                |                  |                |                  | 1  |

**Figure S9.** Fluorenyl ester of glutamic acid 111 of RNase A.





## 9. MALDI-TOF Mass Spectrometry Data for FLAG-RNase A-Esterification Experiments

### A. Untreated FLAG-RNase A (expected $m/z$ 14816)

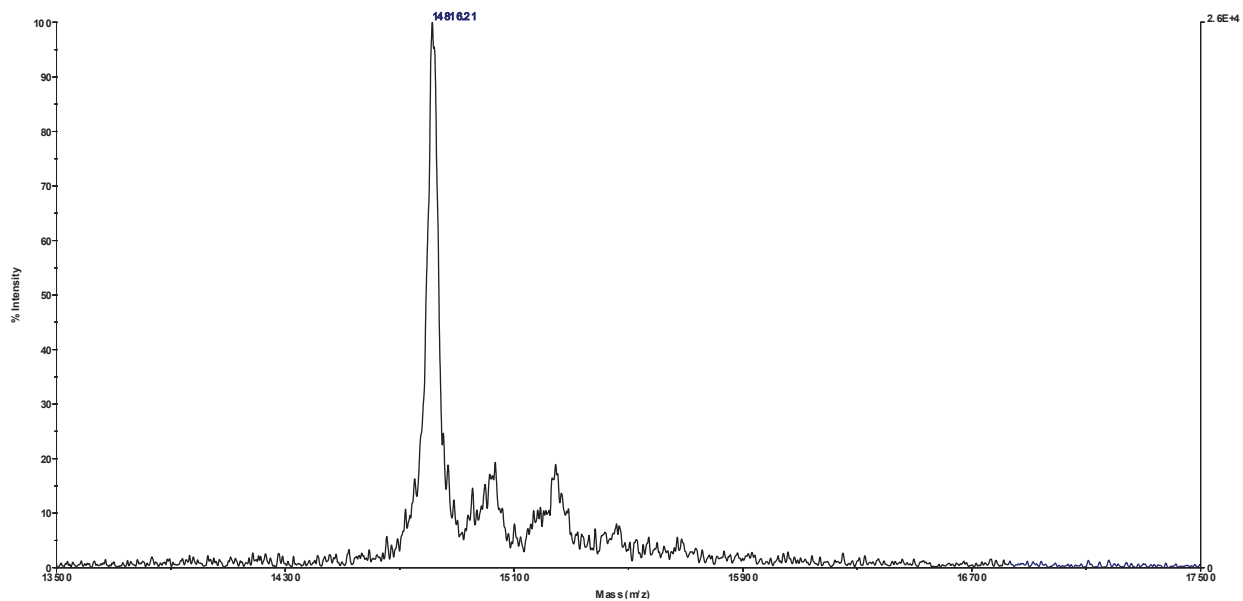

### B. FLAG-RNase A esterified with diazofluorene (2) (10 equiv) (expected $m/z$ 14816 + 164n)

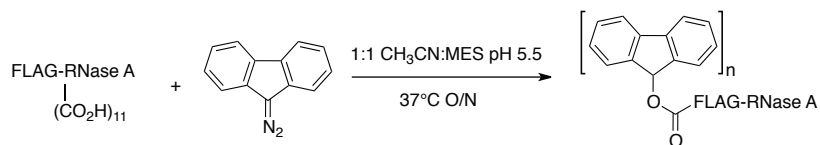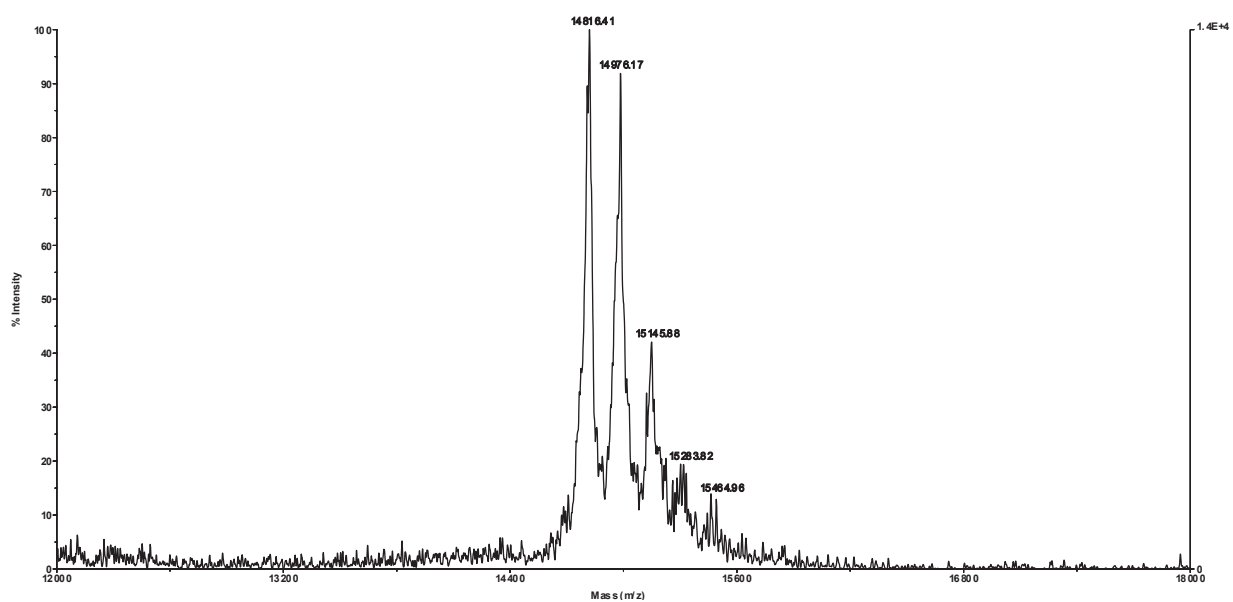

C. FLAG-RNase A-esterification with diazofluorene (**2**) (200 equiv) (expected  $m/z$  14816 + 164n)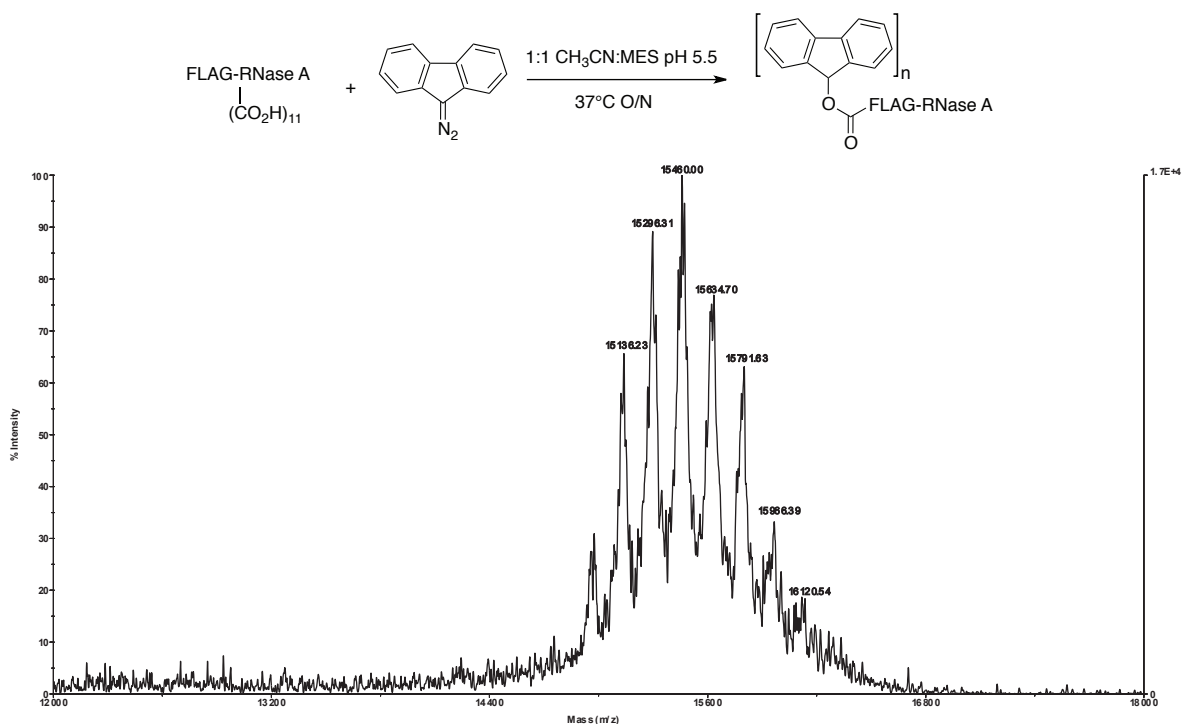

**Figure S11.** MALDI-TOF mass spectra of untreated FLAG-RNase A and FLAG-RNase A treated with diazofluorene (**2**).

A. HeLa cell lysate-treated FLAG-RNase A esterified with diazofluorene (**2**) (10 equiv) (expected  $m/z$  14816)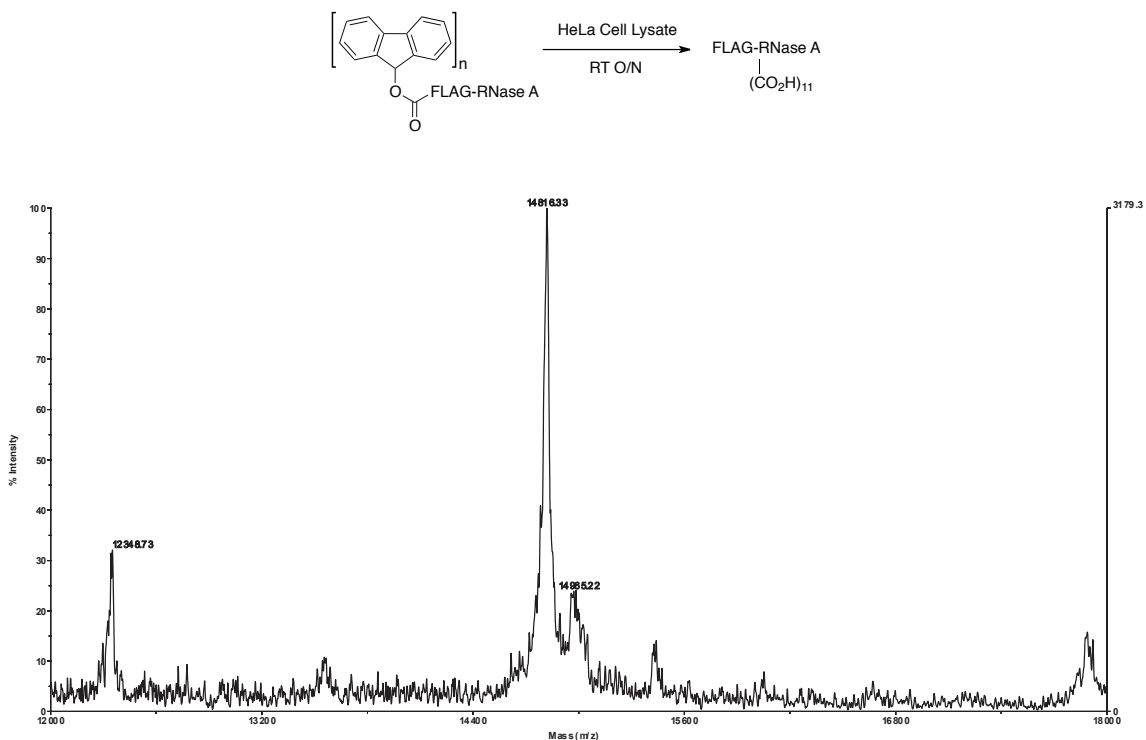

**B.** HeLa cell lysate-treated FLAG–RNase A esterified with diazofluorene (**2**) (200 equiv) (expected  $m/z$  14816)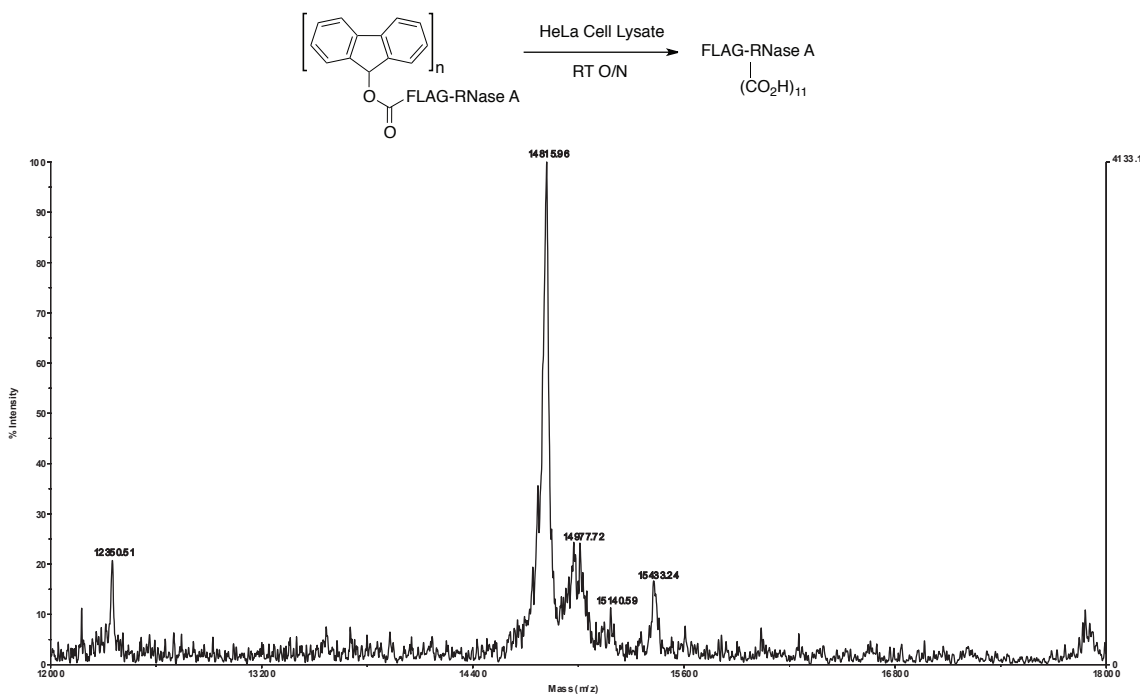

**Figure S12.** MALDI–TOF mass spectra of HeLa cell lysate-treated esterified FLAG–RNase A showing hydrolysis of all esters.

**10. Ribonucleolytic Activity Assay Data**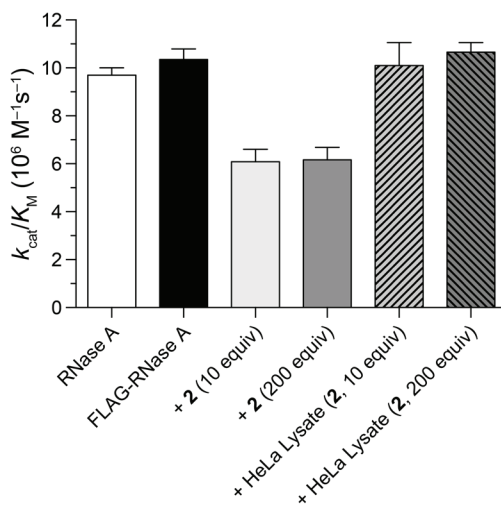

**Figure S13.** Enzymatic activity of RNase A and FLAG–RNase A (unesterified or esterified). When esterified with either a 10- or 200-fold molar excess of diazofluorene (**2**), the ribonucleolytic activity of FLAG–RNase A is decreased by ~50%. Upon exposure to a HeLa cell lysate and subsequent purification via the FLAG tag, the enzymatic activity is restored to original levels.

## 11. MALDI-TOF Mass Spectrometry Data for His<sub>6</sub>-RFP-Esterification Experiments

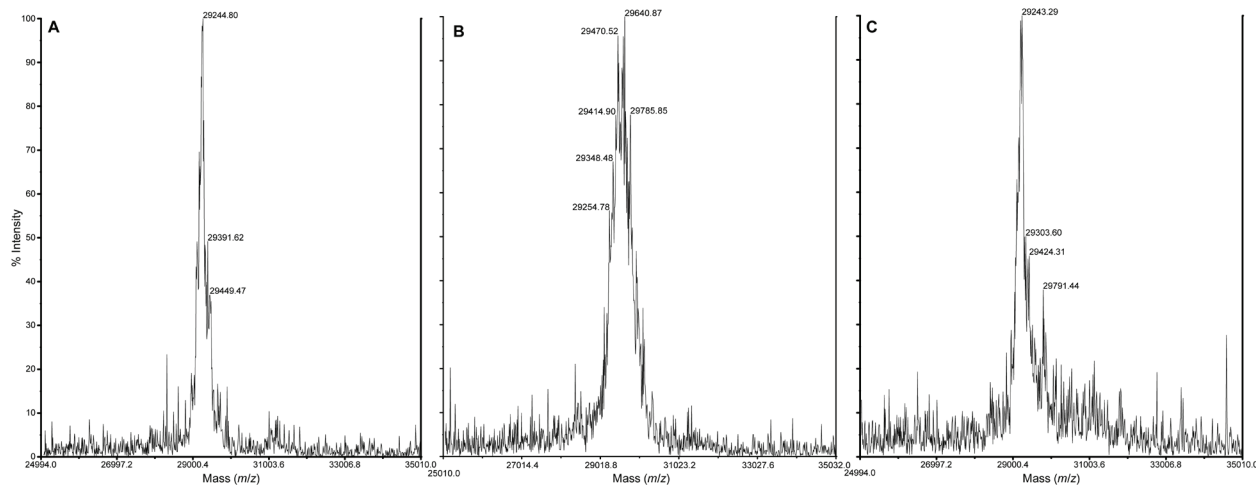

**Figure S14.** MALDI-TOF mass spectra. (A) Untreated His<sub>6</sub>-RFP (expected  $m/z$  29244). (B) His<sub>6</sub>-RFP treated with diazofluorene (**2**) (10 equiv) (expected  $m/z$  29244 + 164n). (C) HeLa cell lysate-treated esterified His<sub>6</sub>-RFP (expected  $m/z$  29244) showing hydrolysis of all esters.

## 12. References

1. P. A. Leland, L. W. Schultz, B.-M. Kim and R. T. Raines, *Proc. Natl. Acad. Sci. USA*, 1998, **95**, 10407-10412.
2. B. R. Kelemen, T. A. Klink, M. A. Behlke, S. R. Eubanks, P. A. Leland and R. T. Raines, *Nucleic Acids Res.*, 1999, **27**, 3696-3701.
3. N. C. Shaner, R. E. Campbell, P. A. Steinbach, B. N. G. Giepmans, A. E. Palmer and R. Y. Tsien, *Nat. Biotechnol.*, **22**, 1567-1572.

**13. NMR Spectra** (All compounds were dissolved in CDCl<sub>3</sub> unless indicated otherwise.)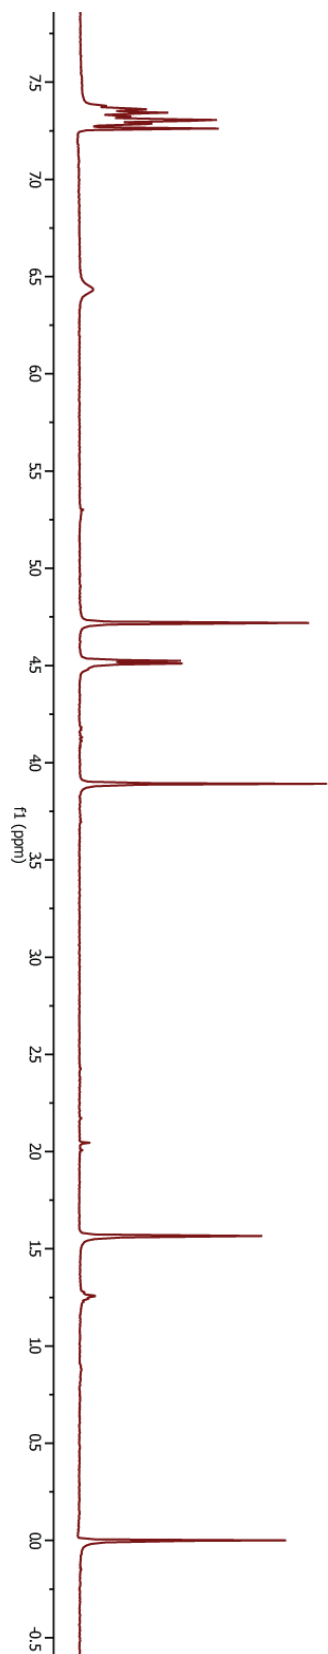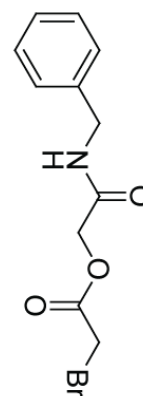

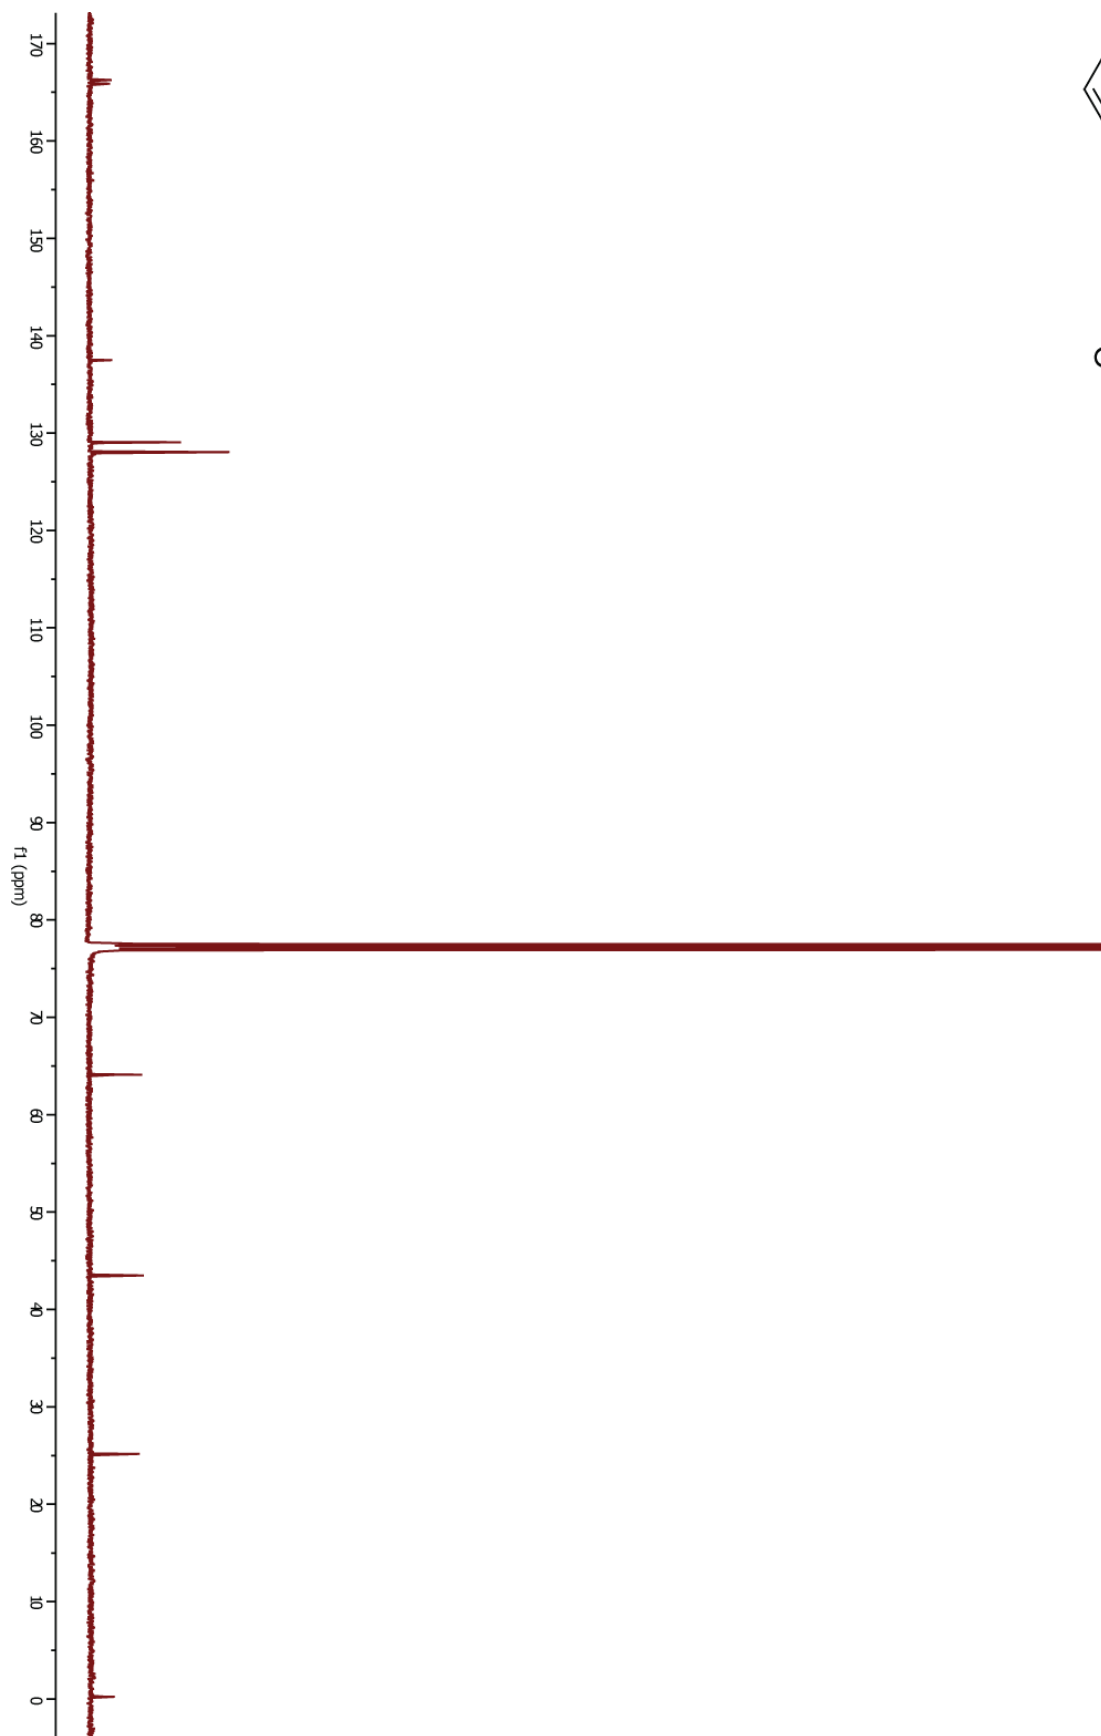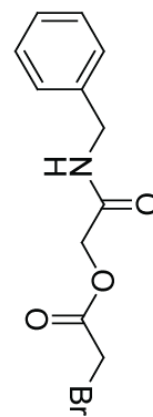



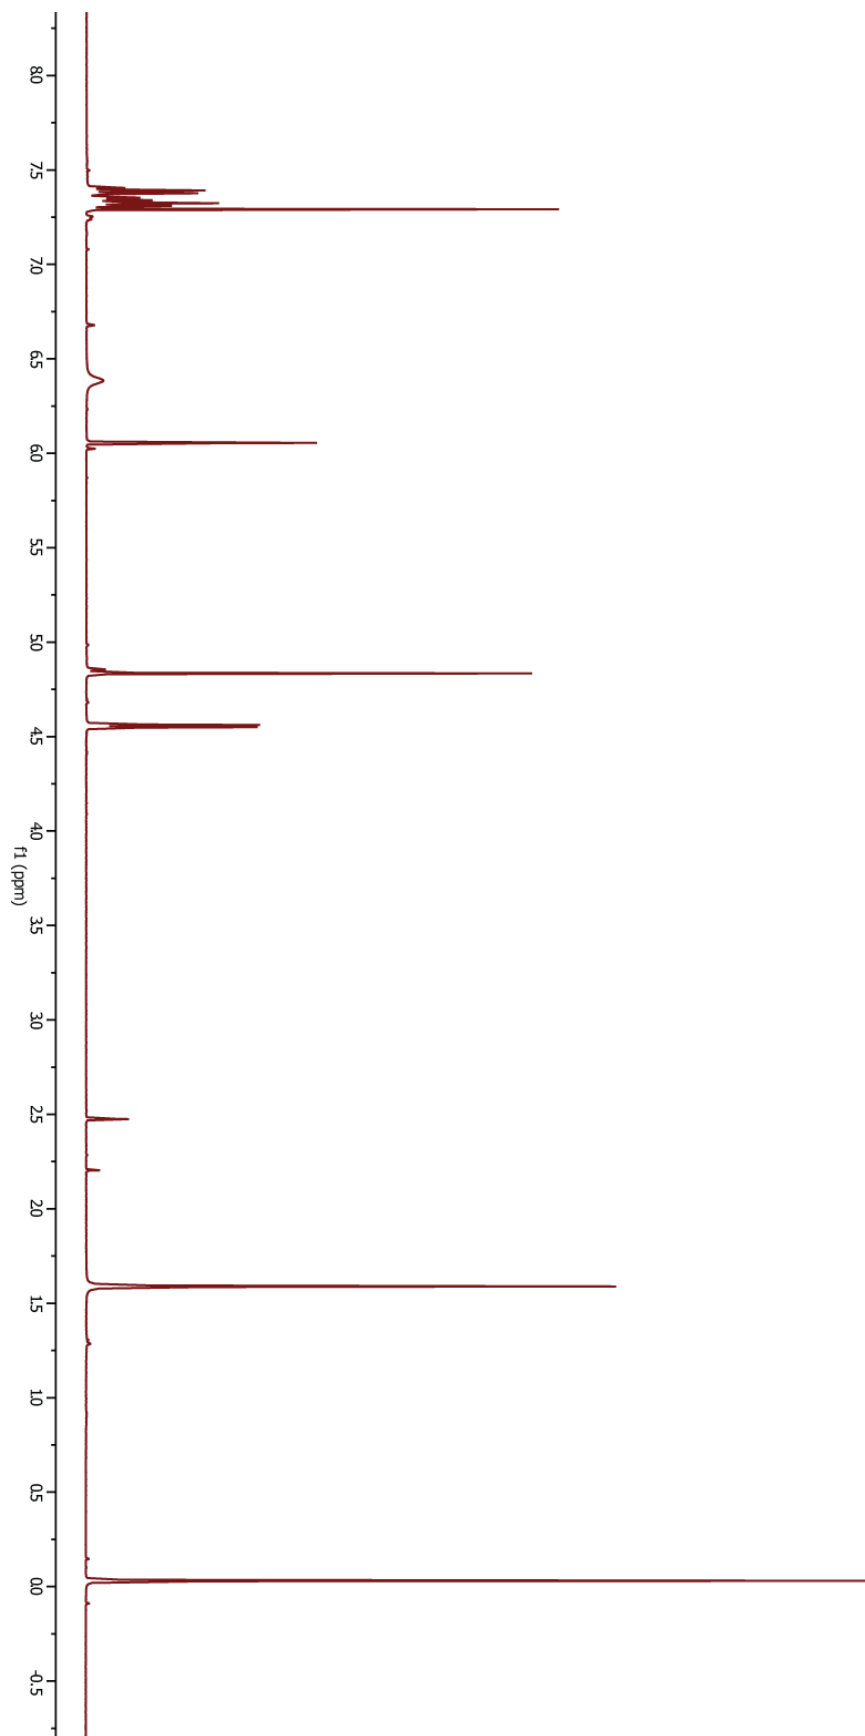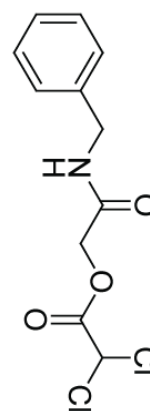

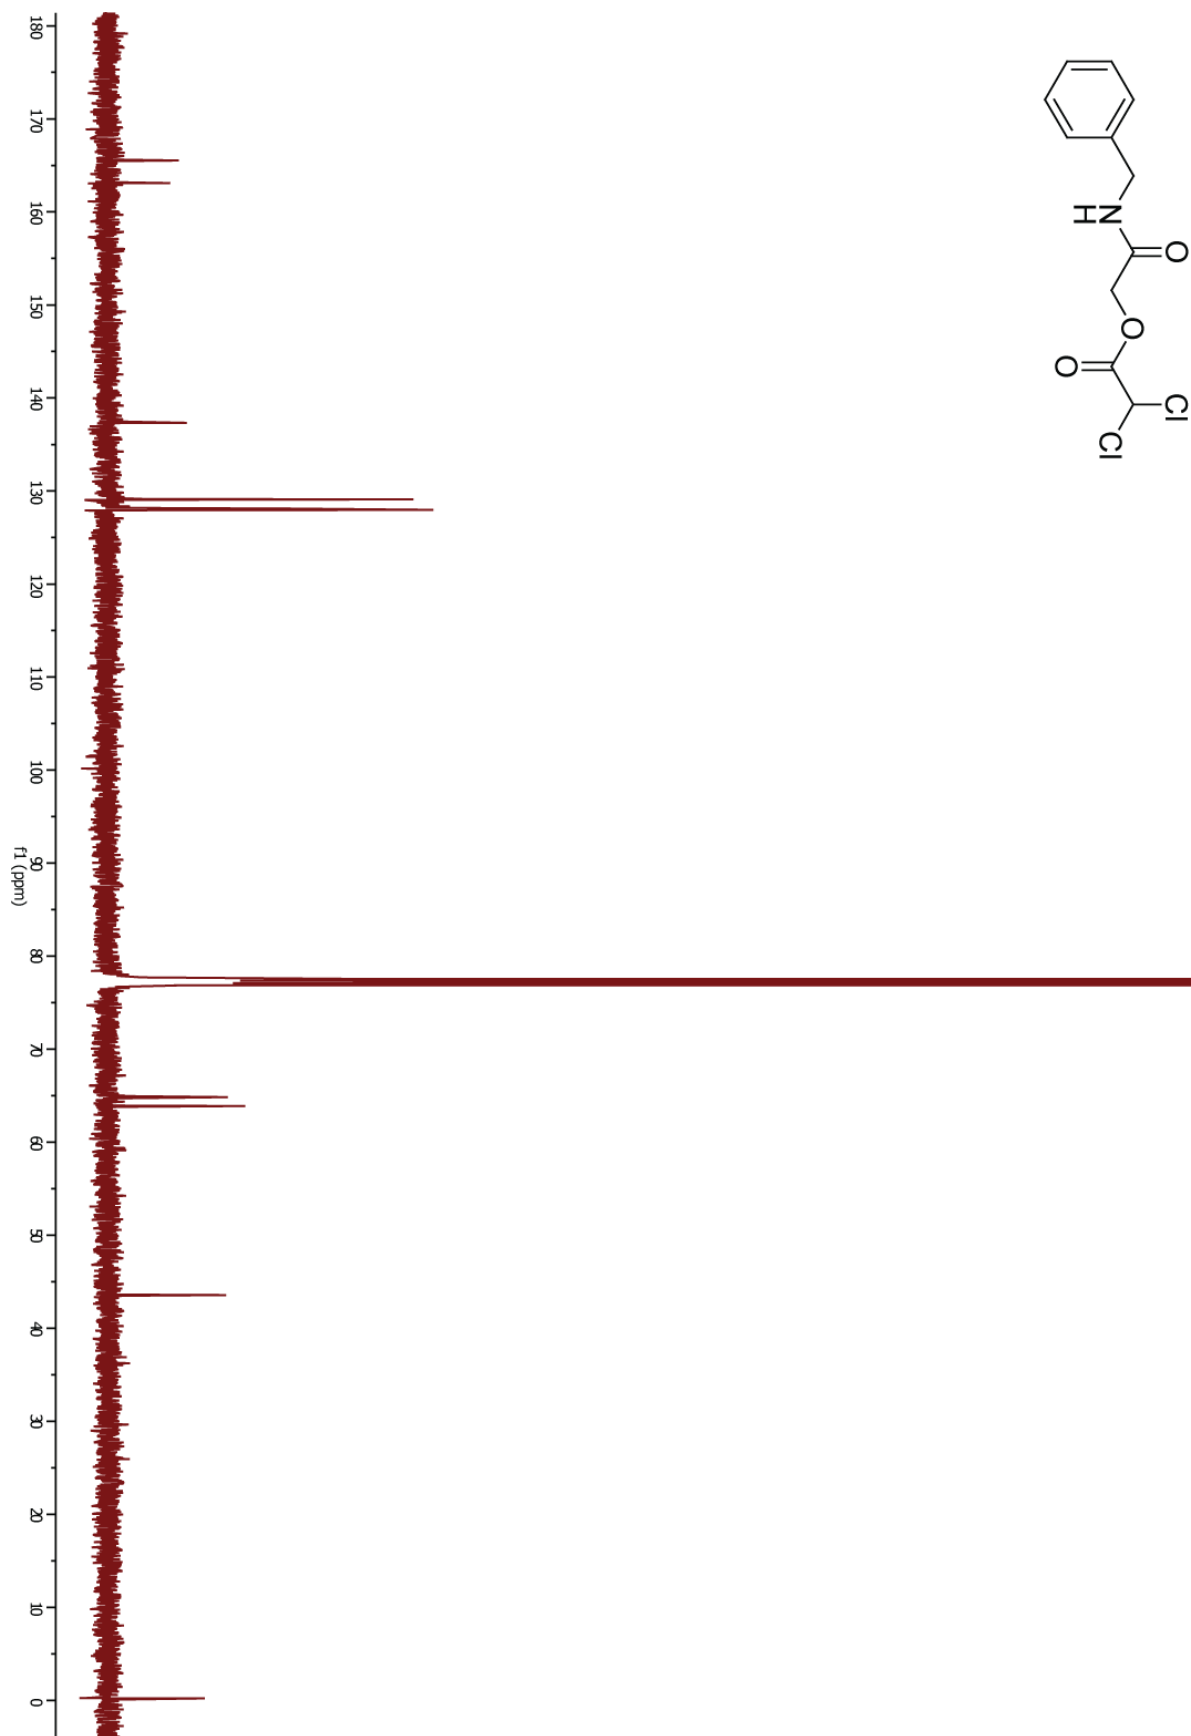



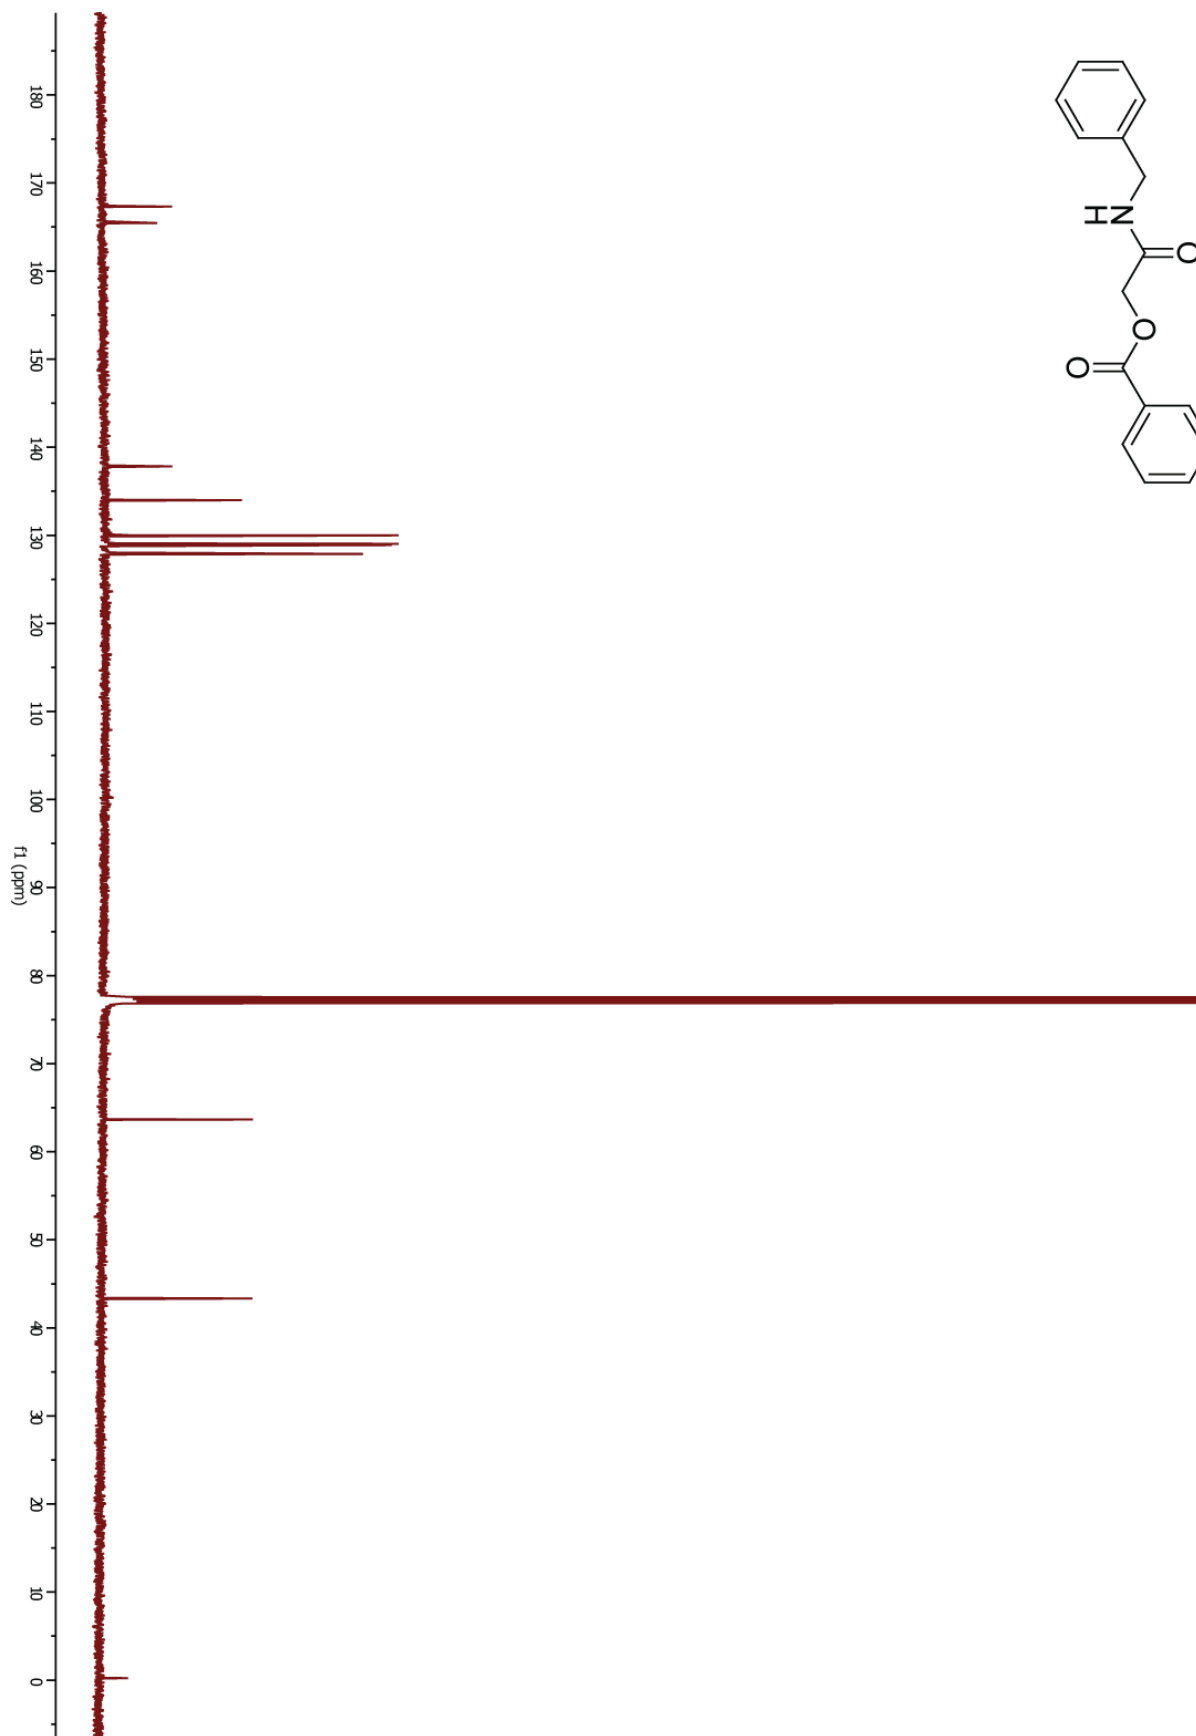

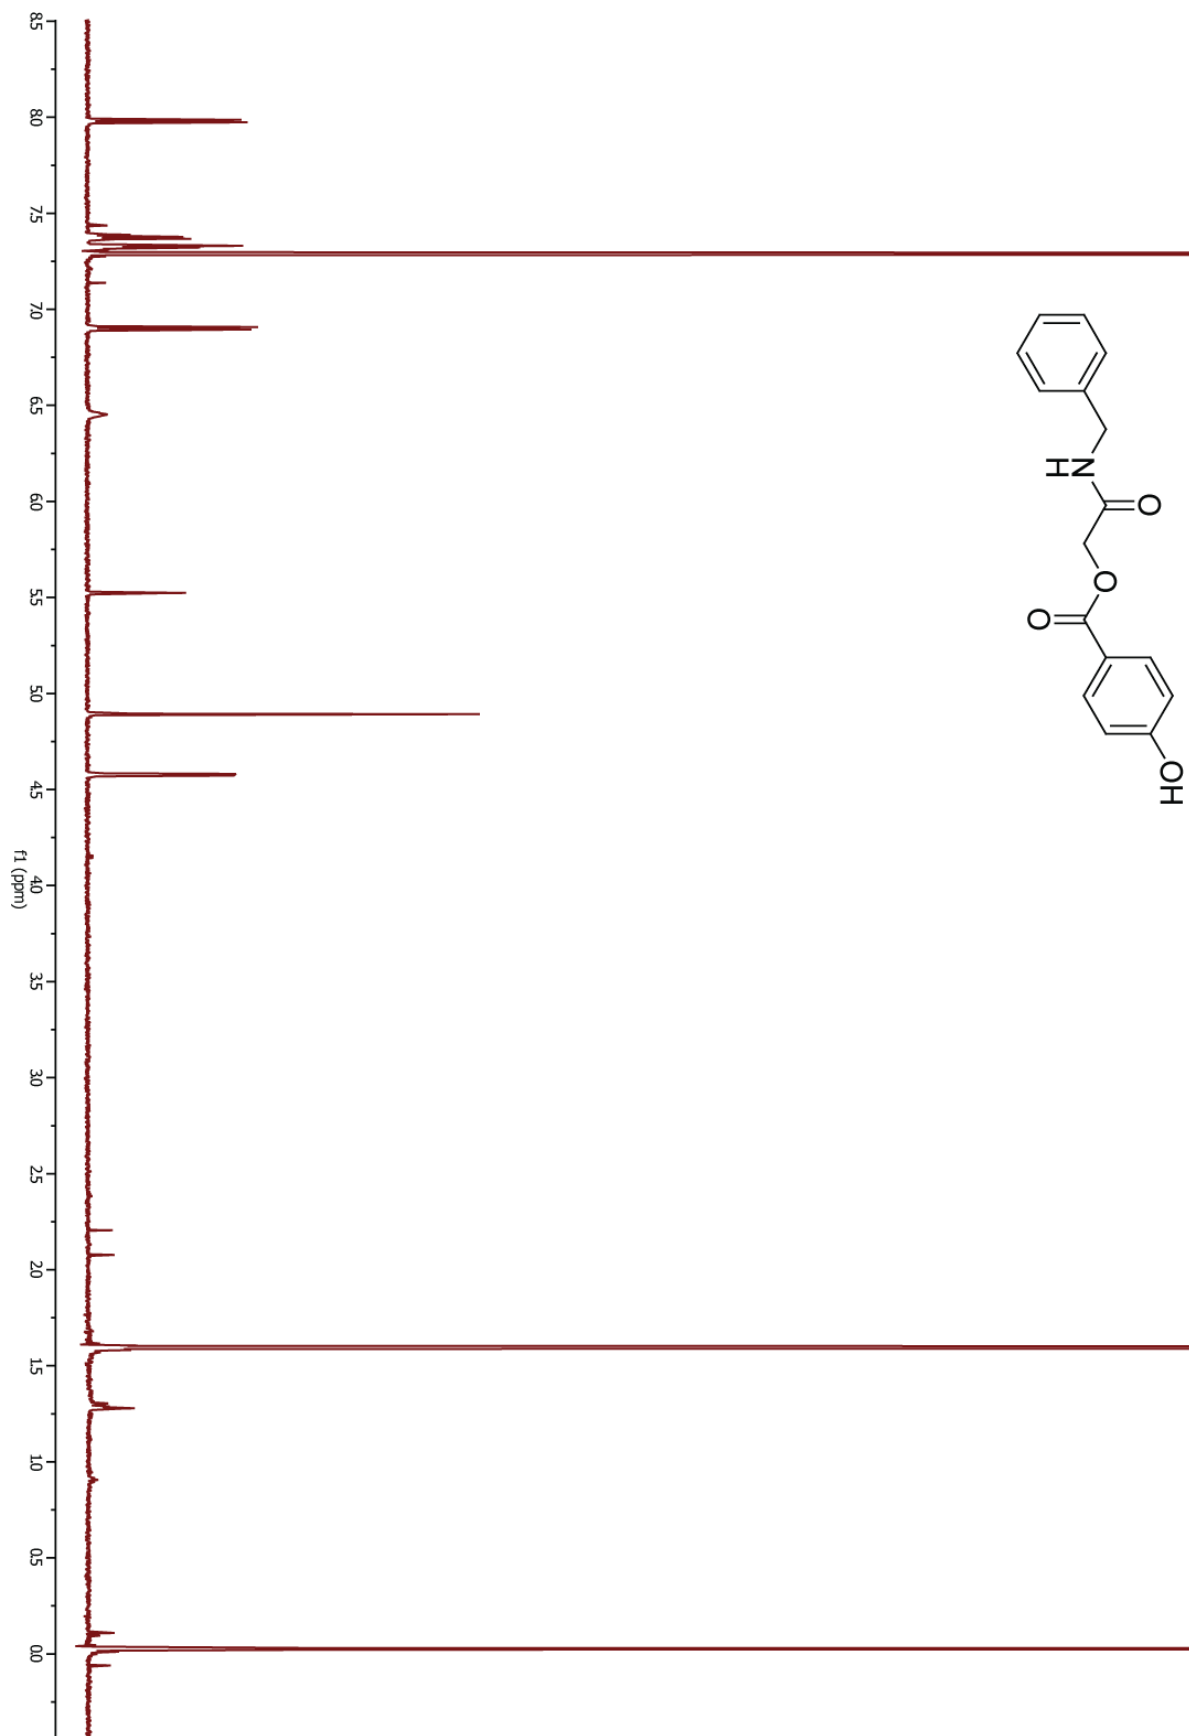

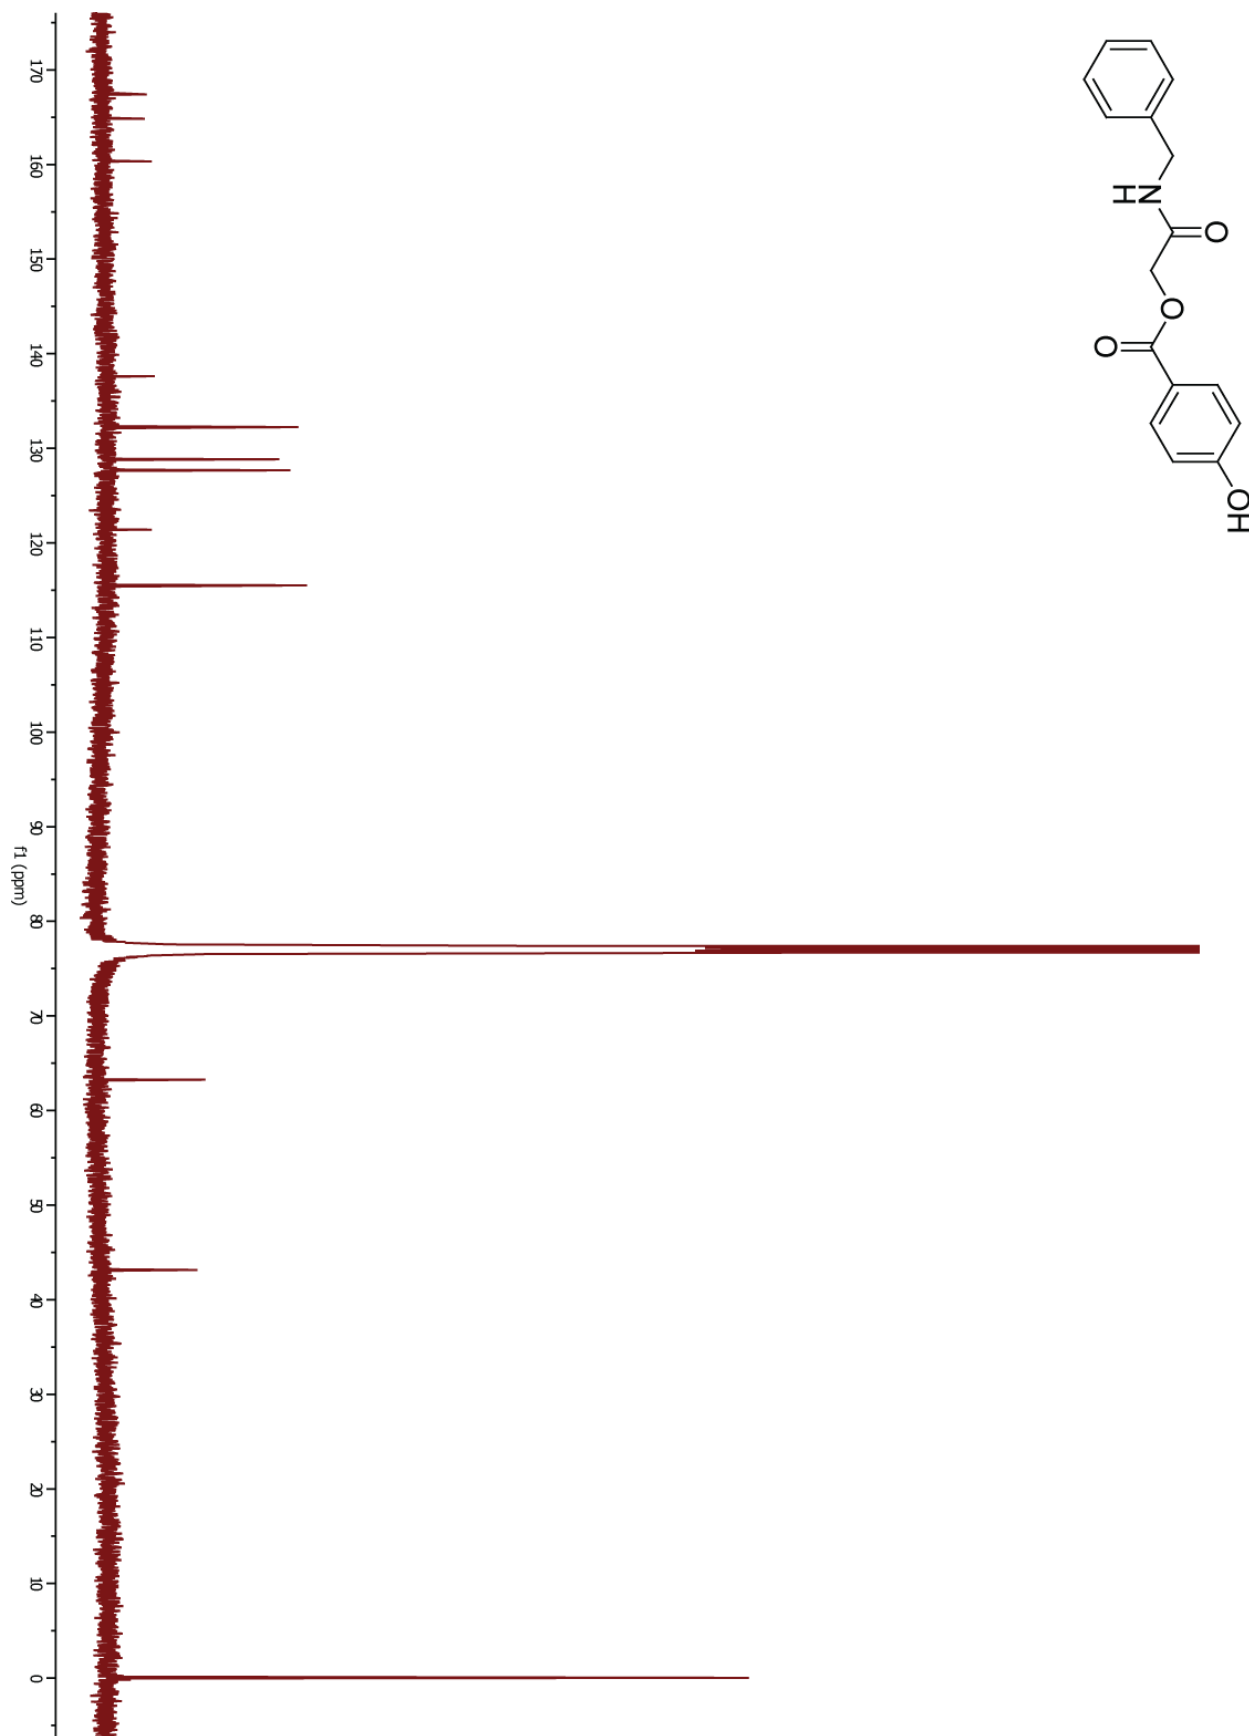



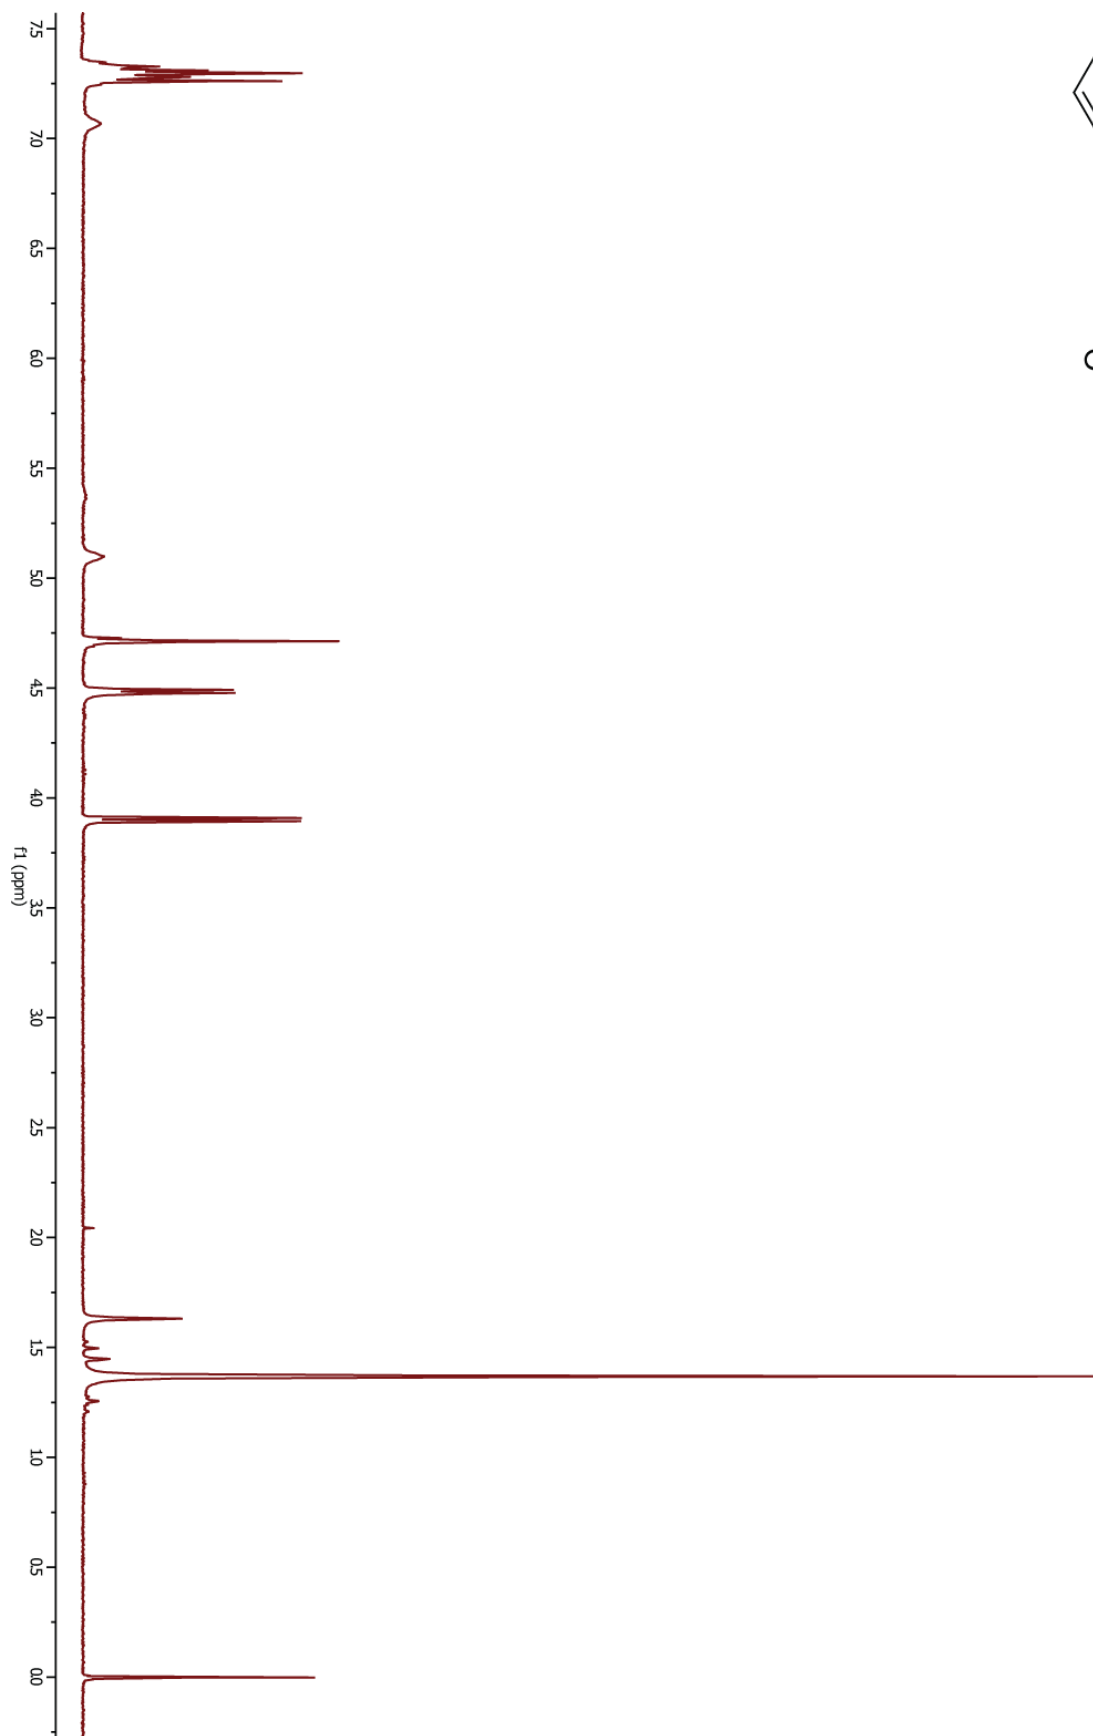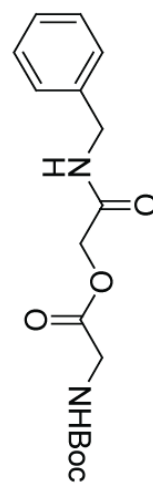

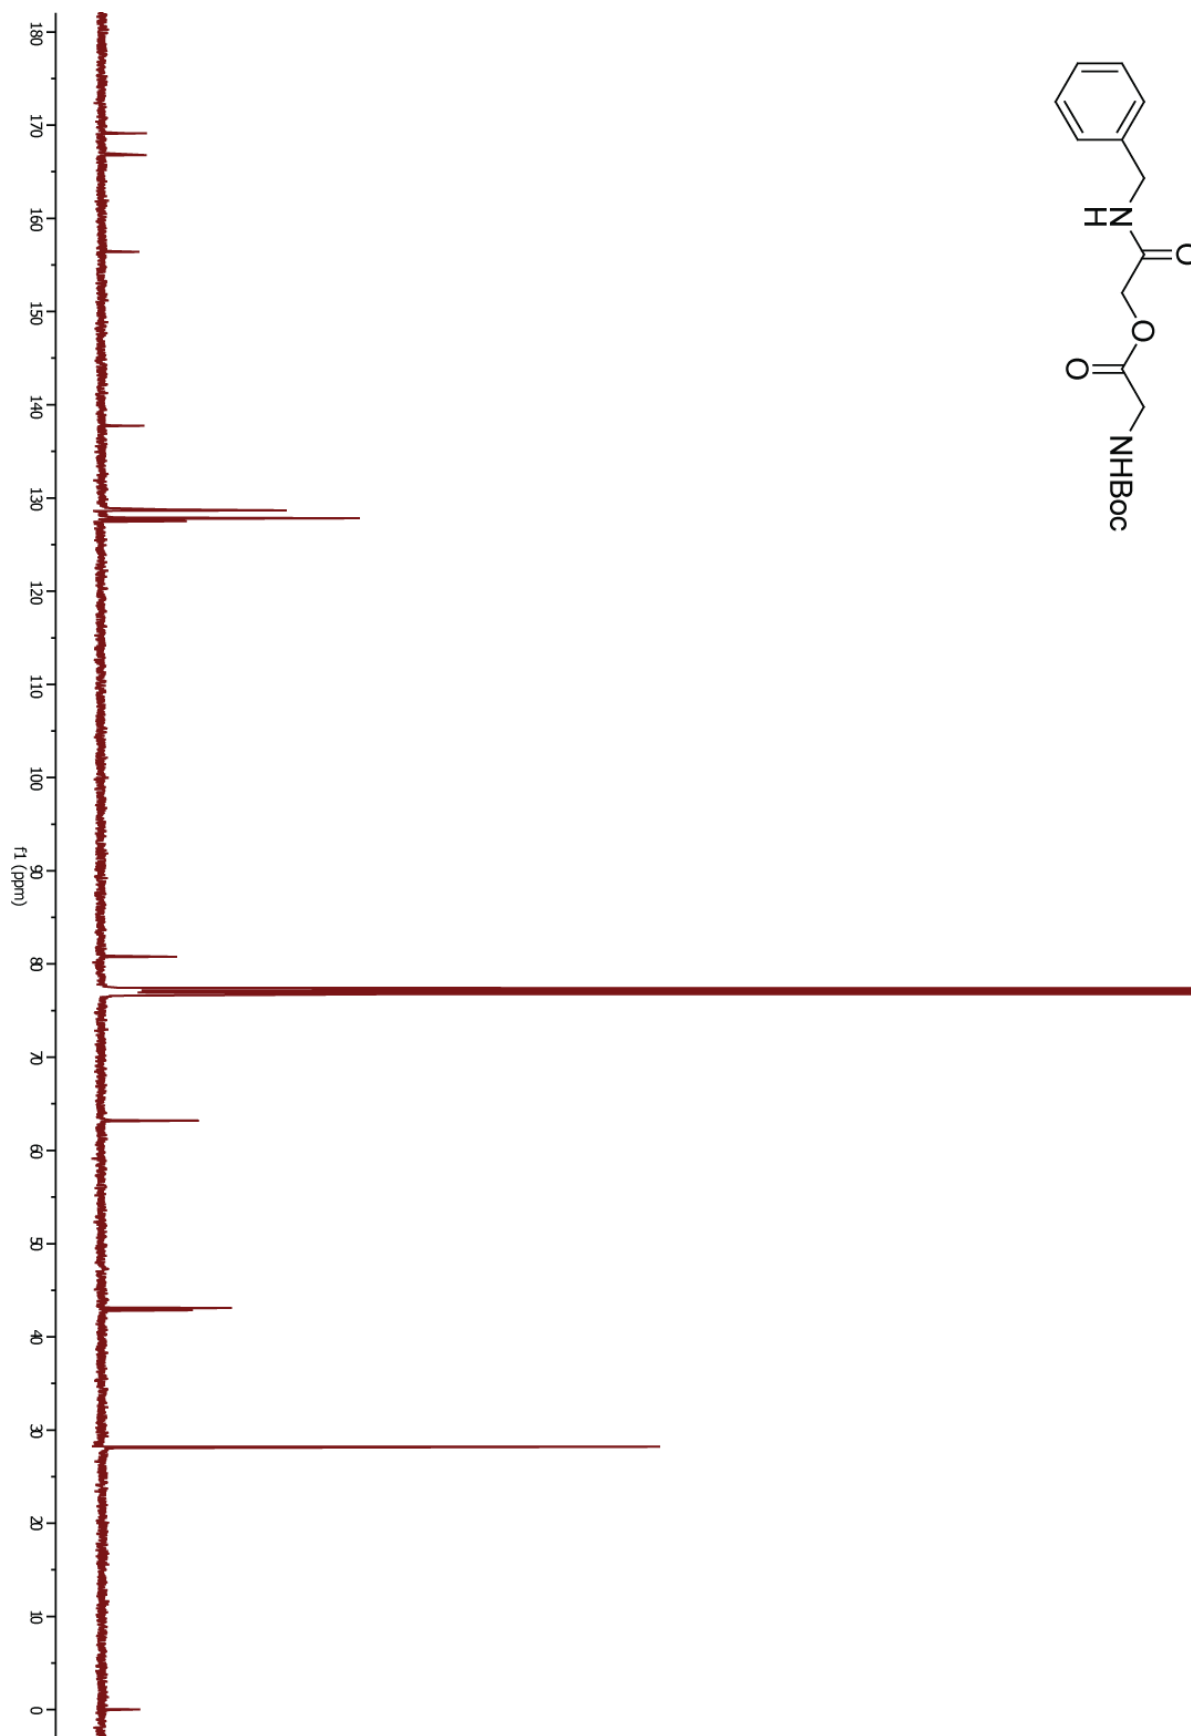

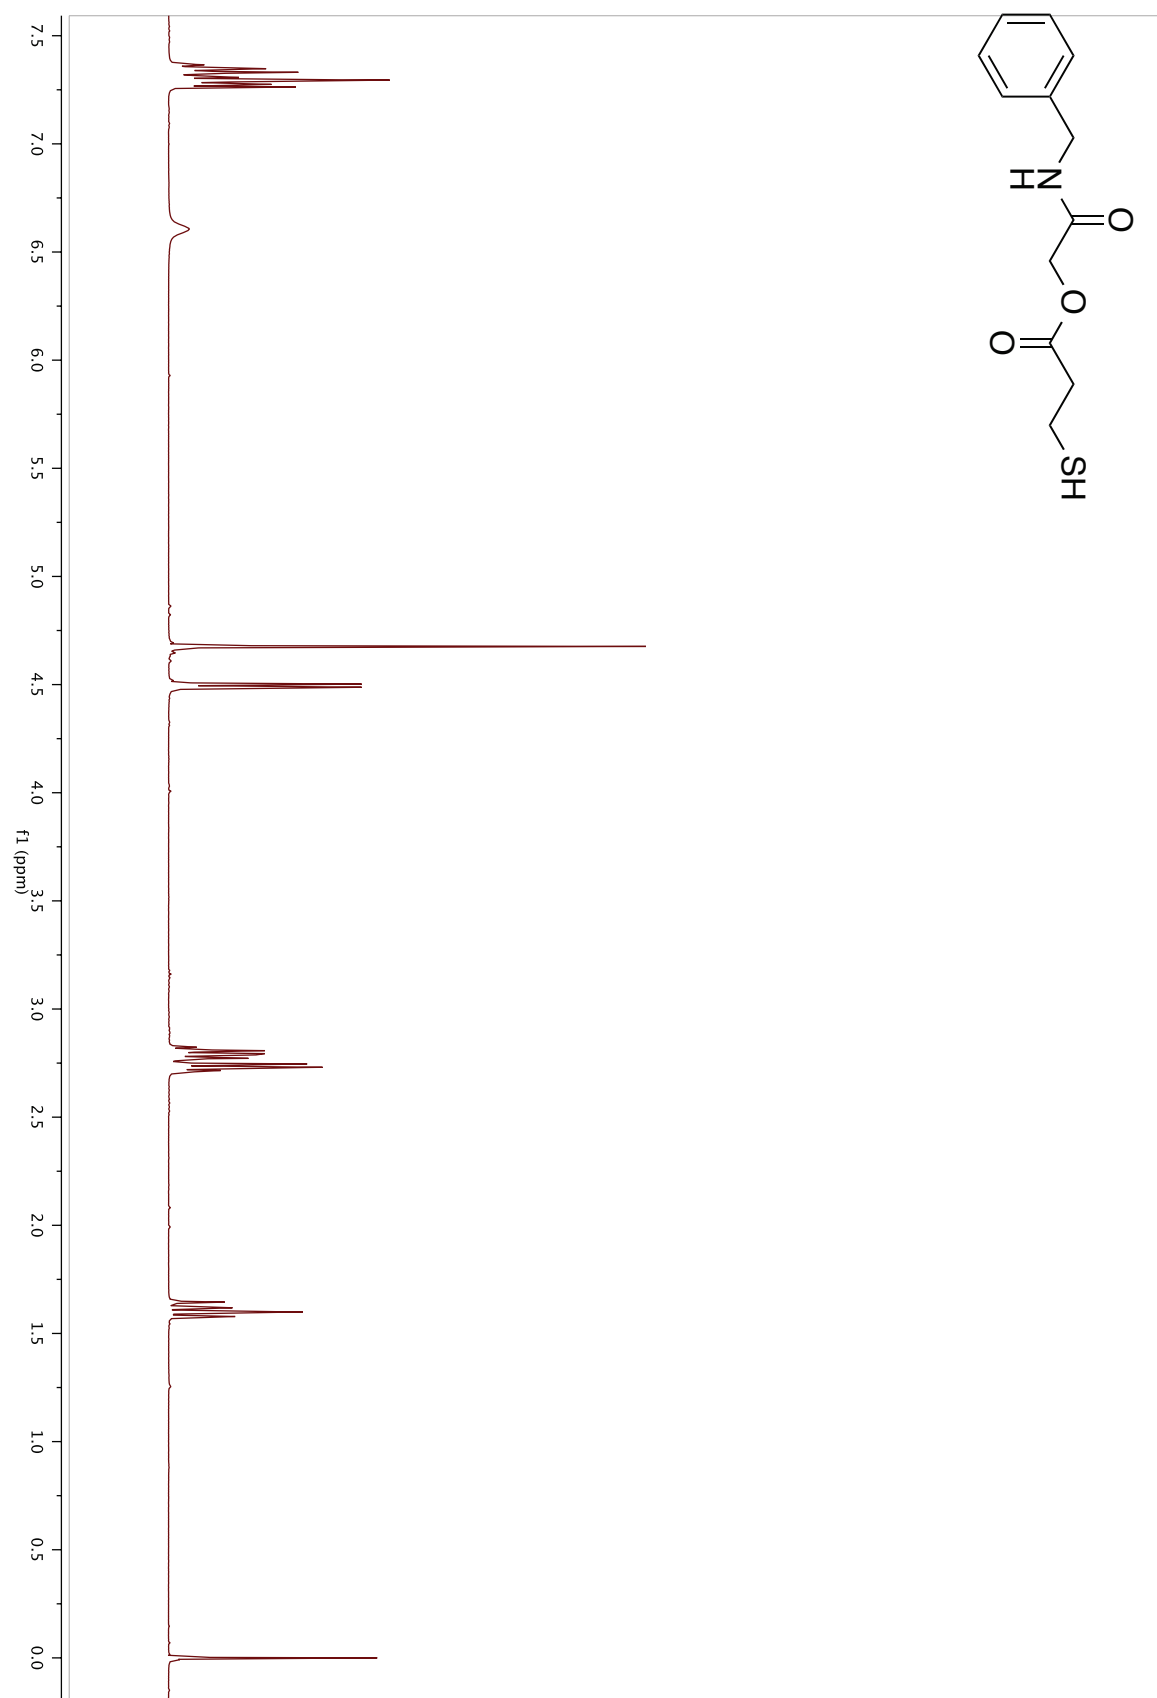

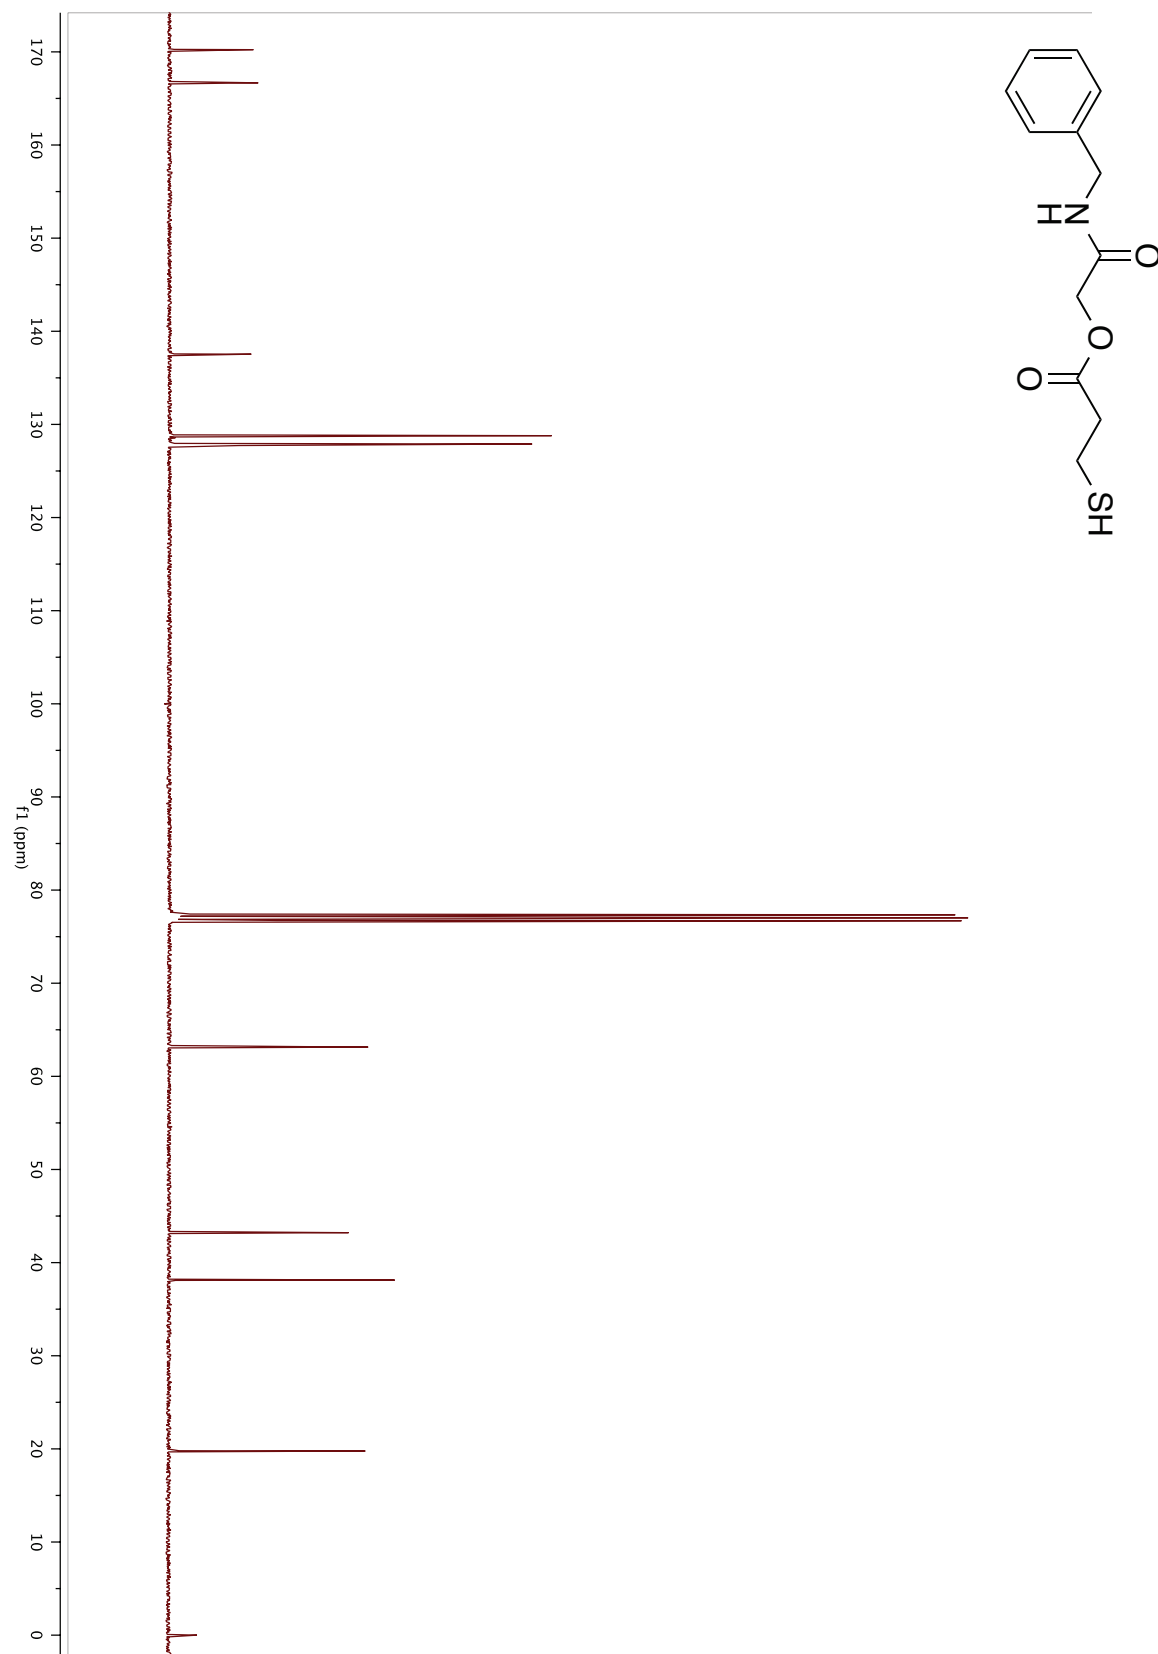

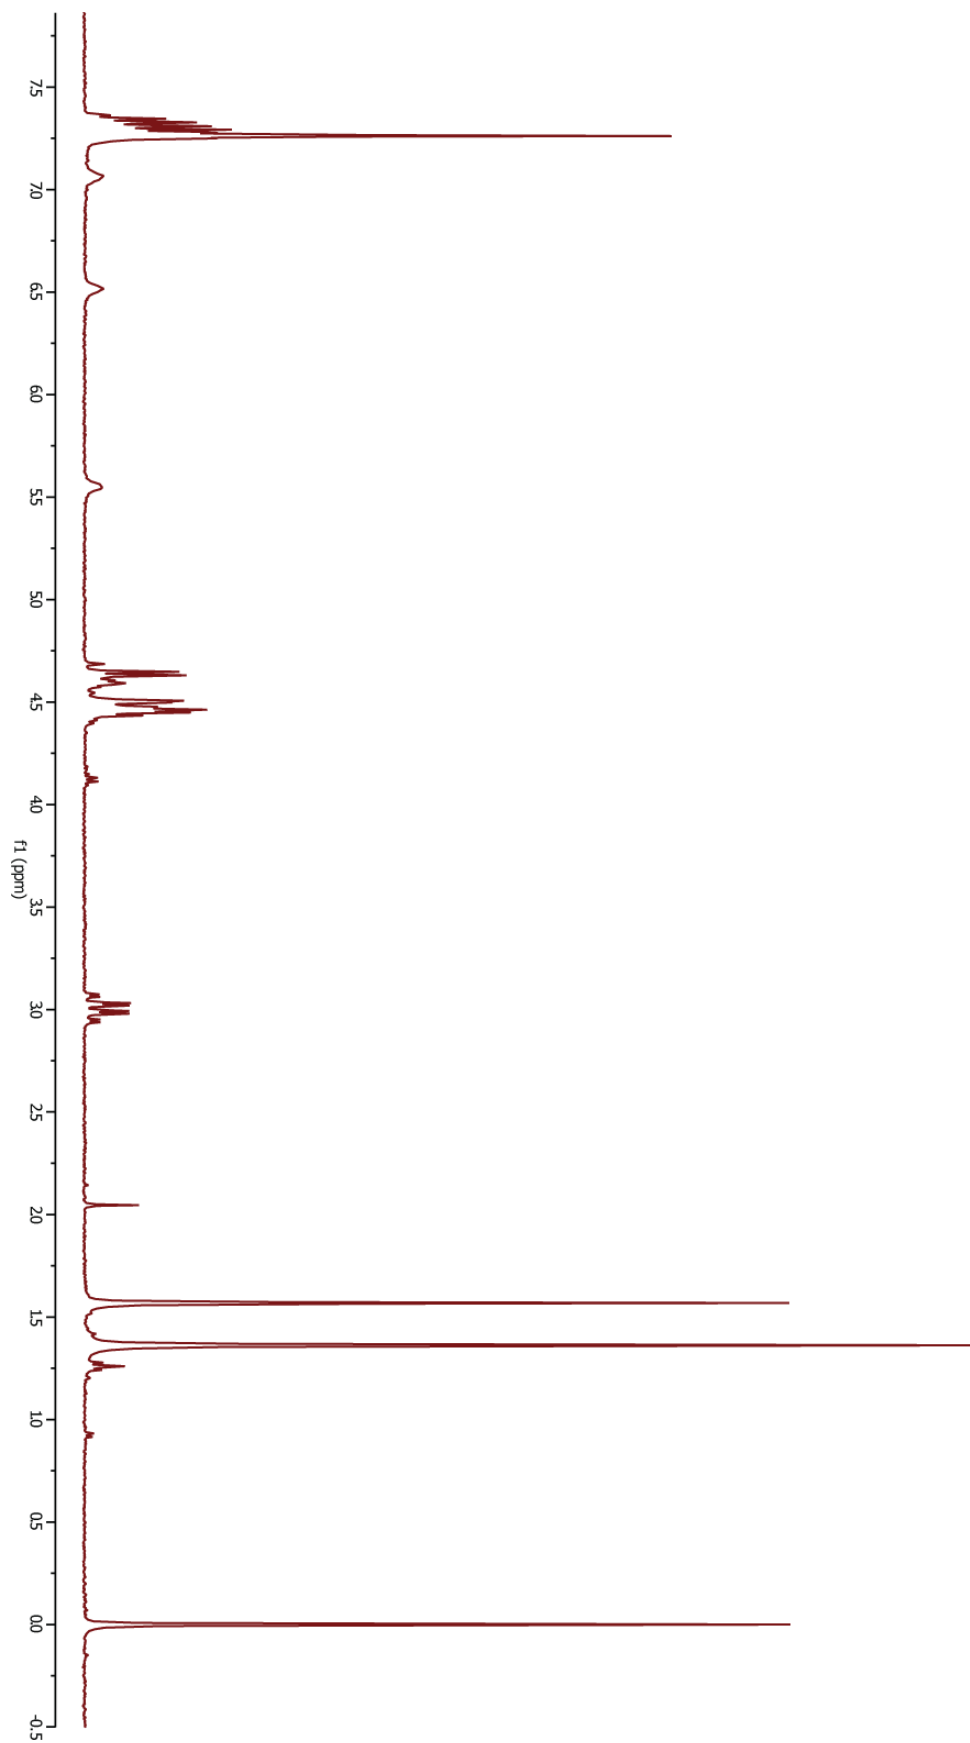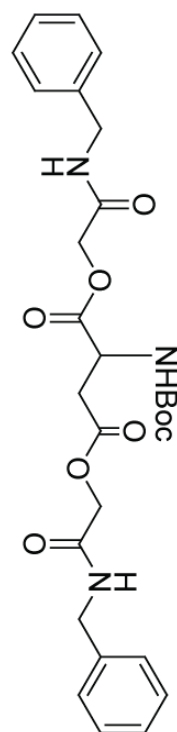

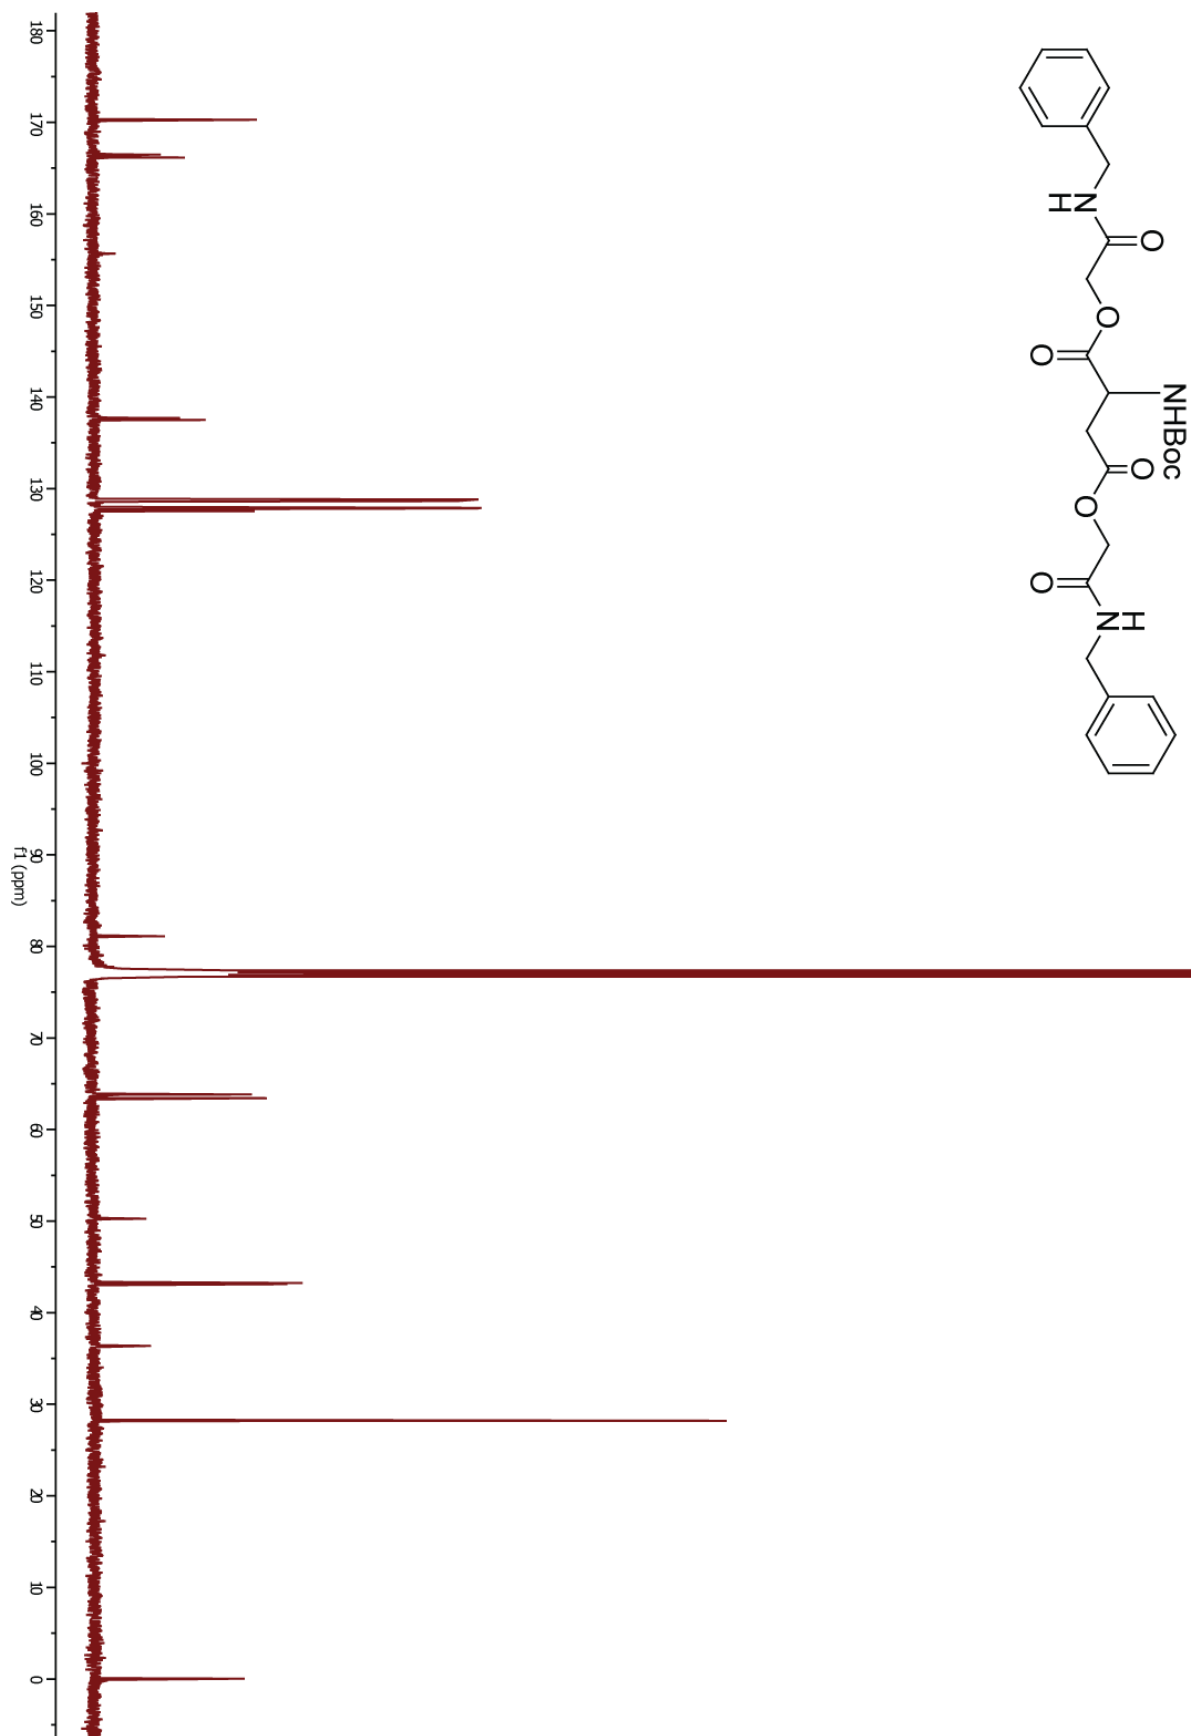

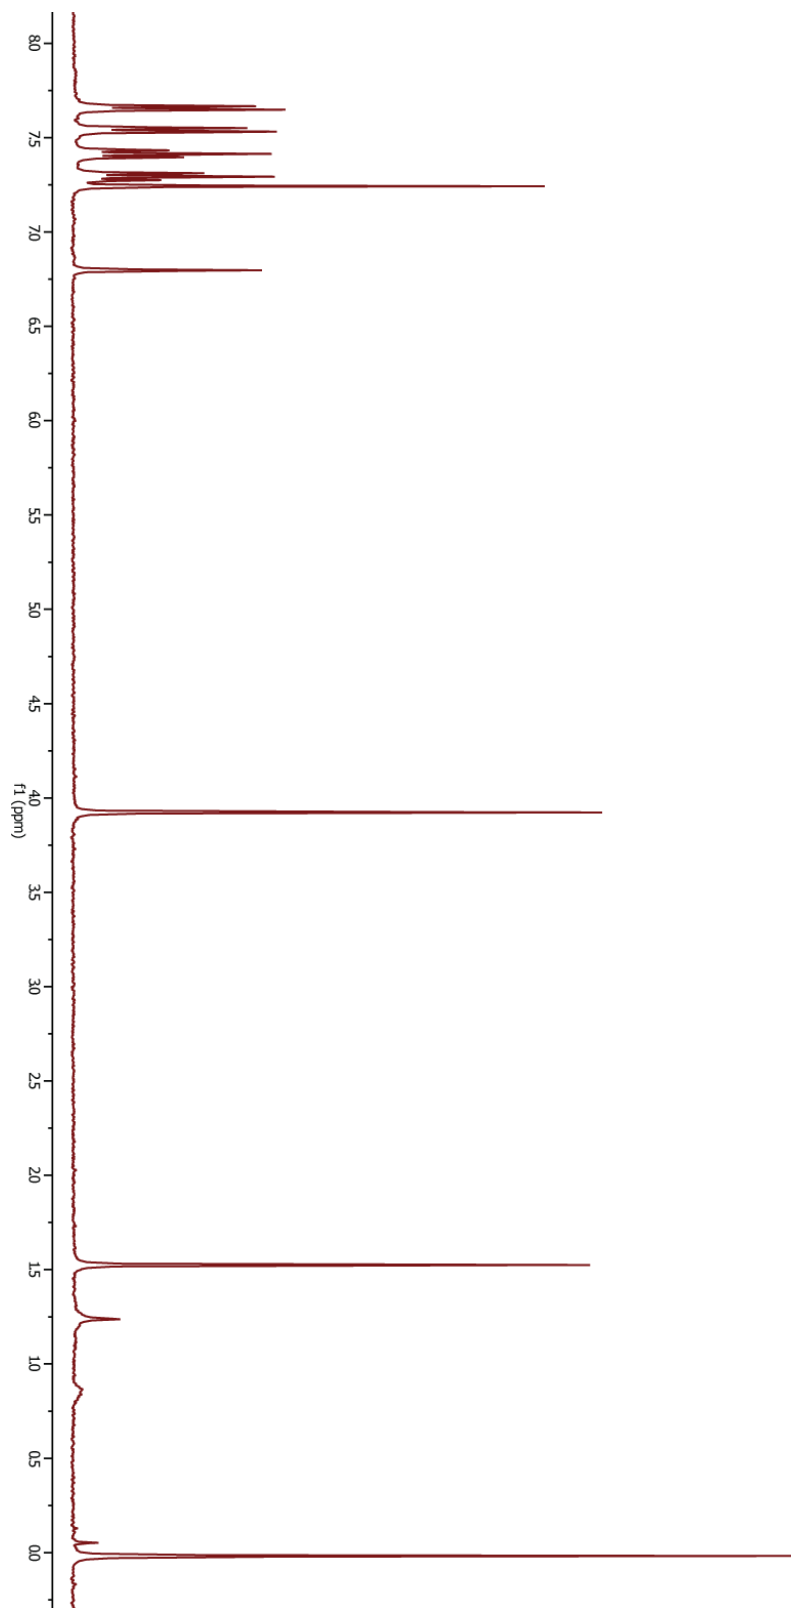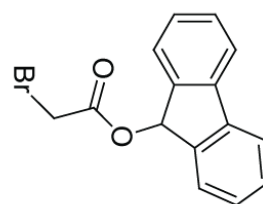

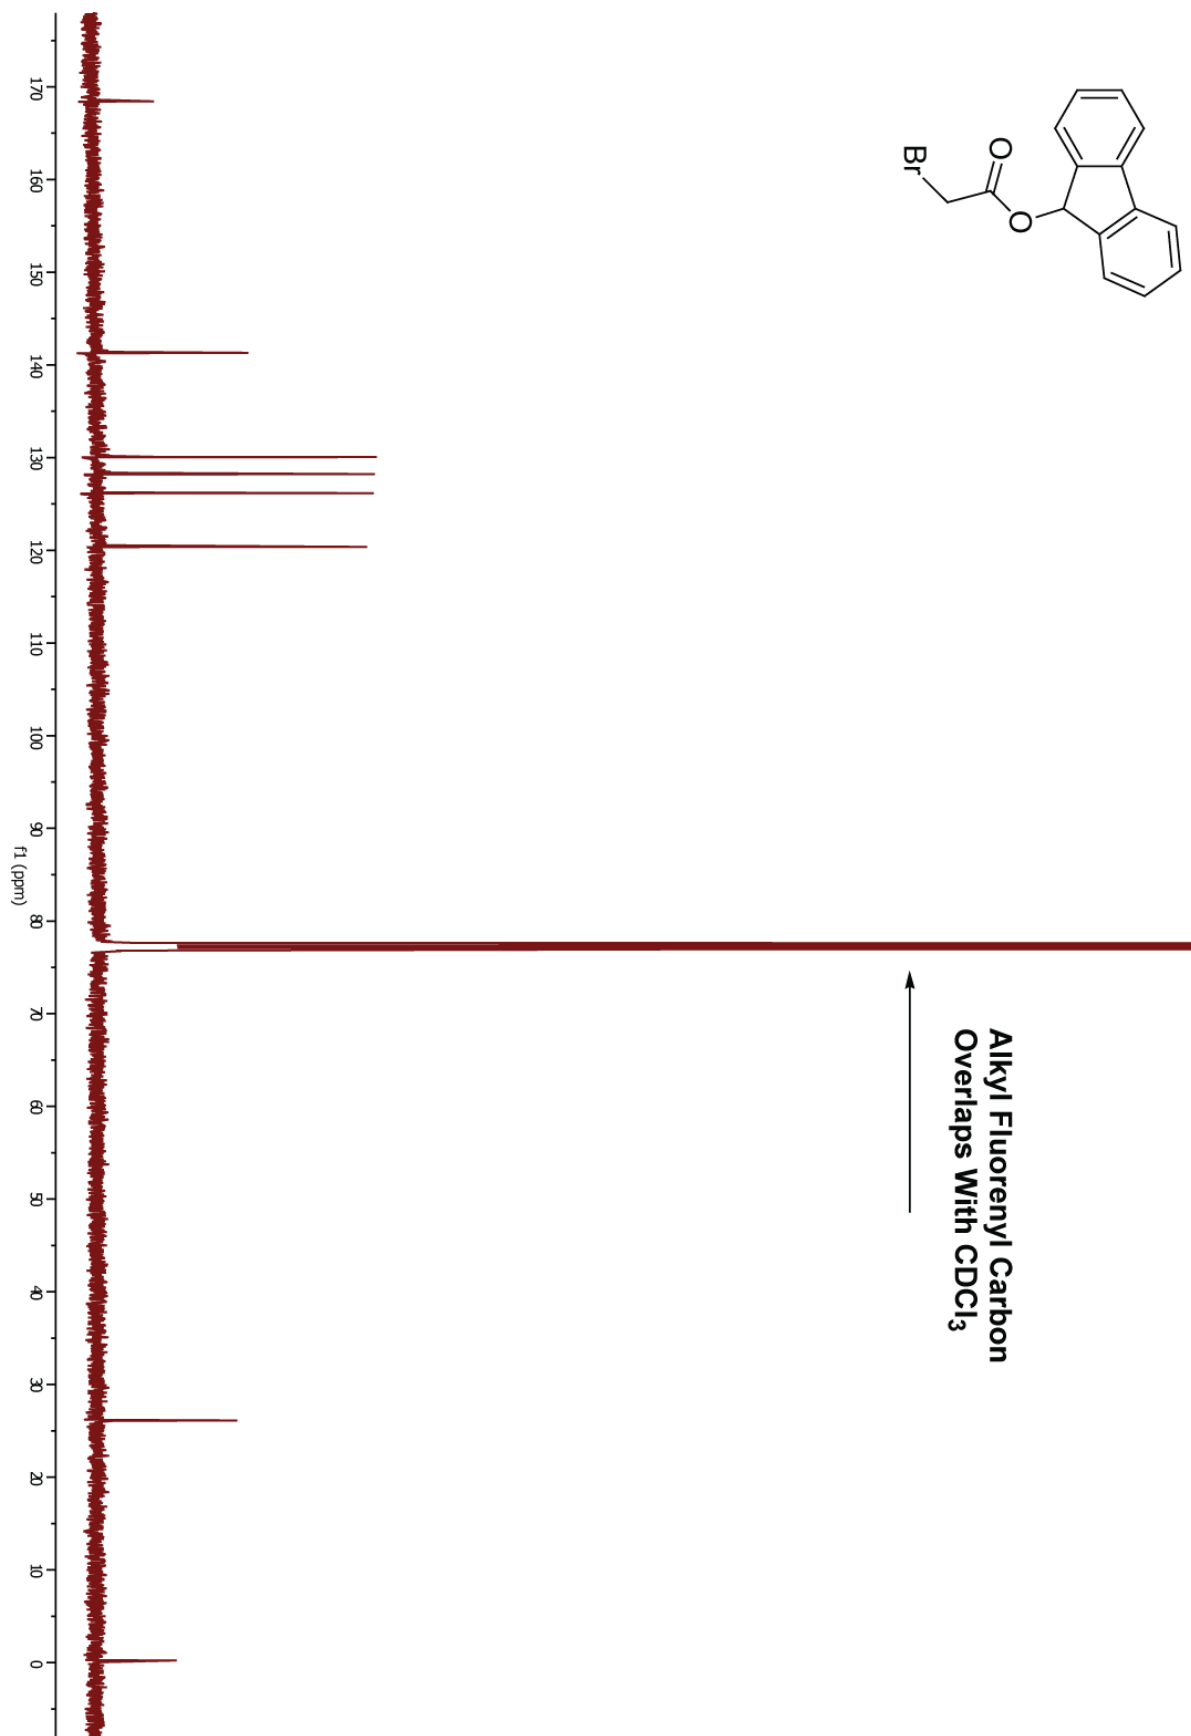



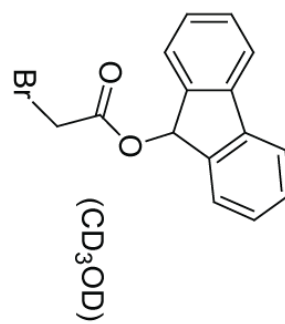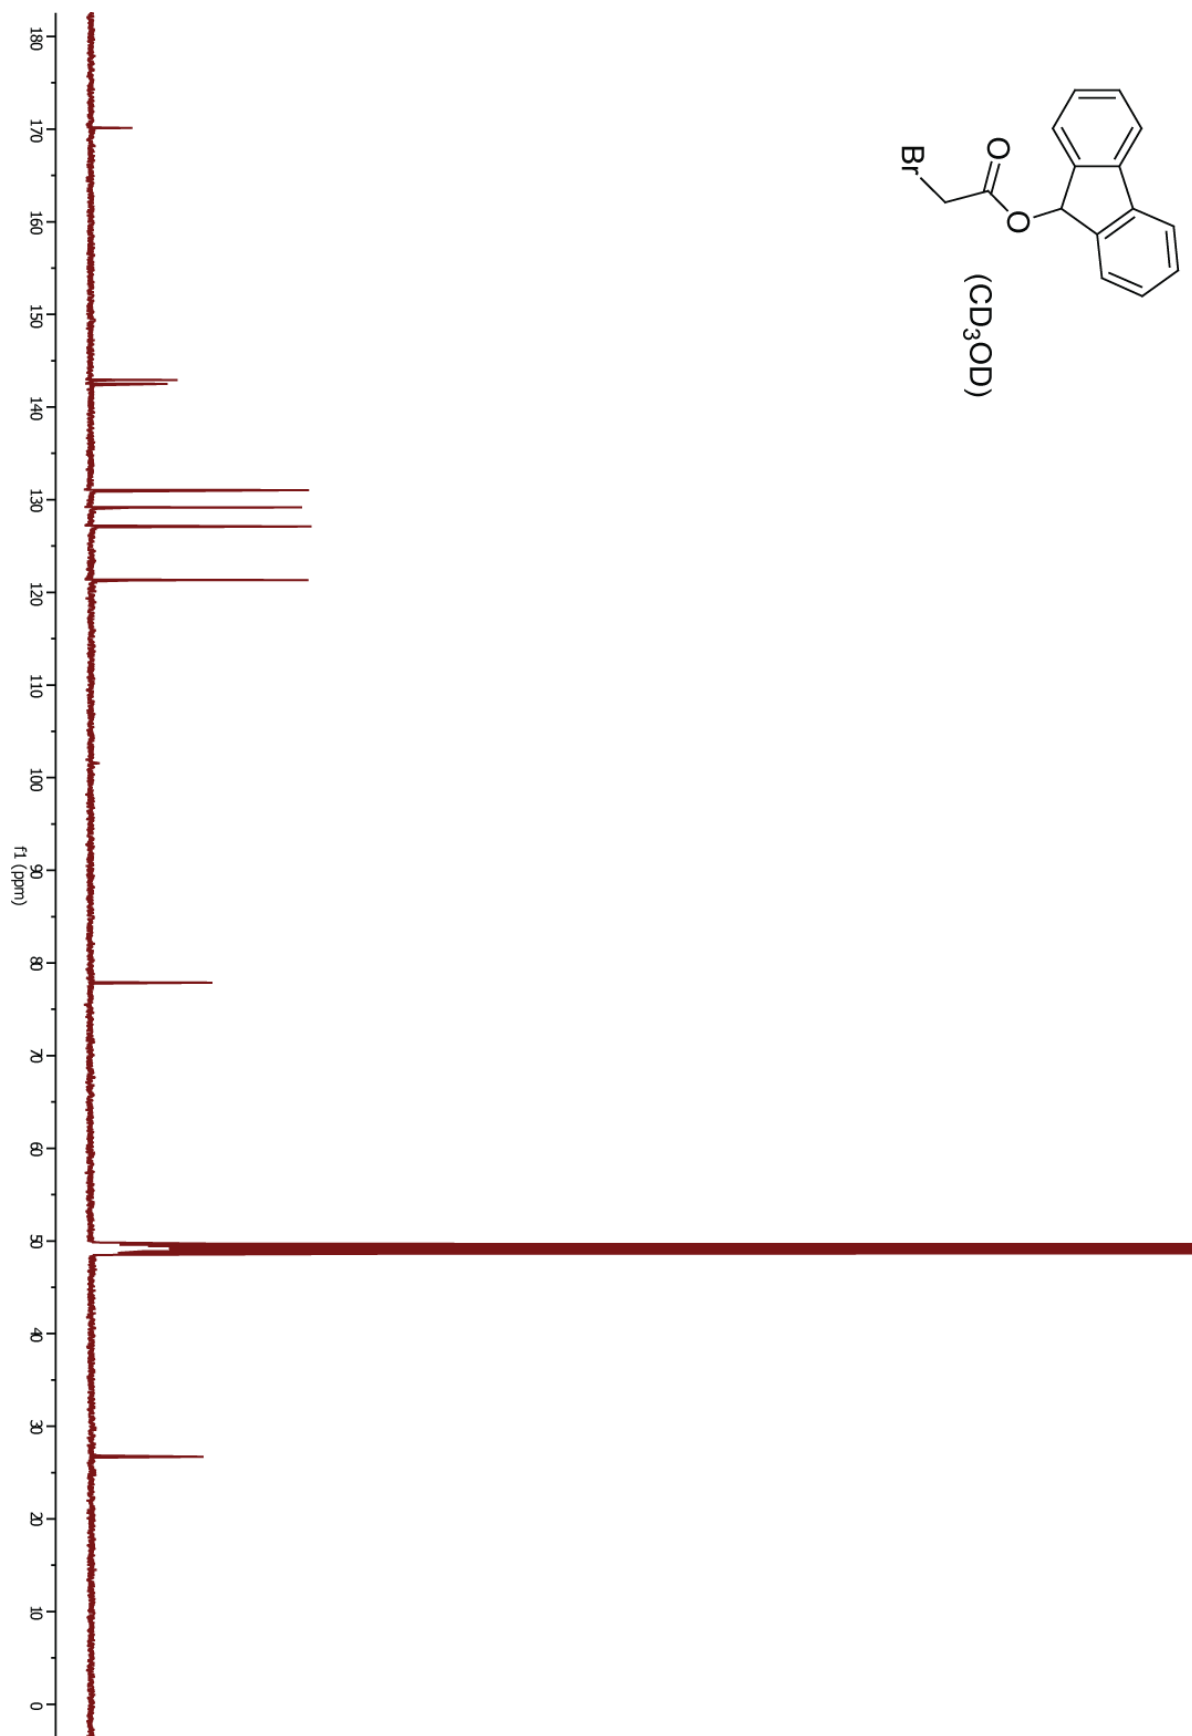

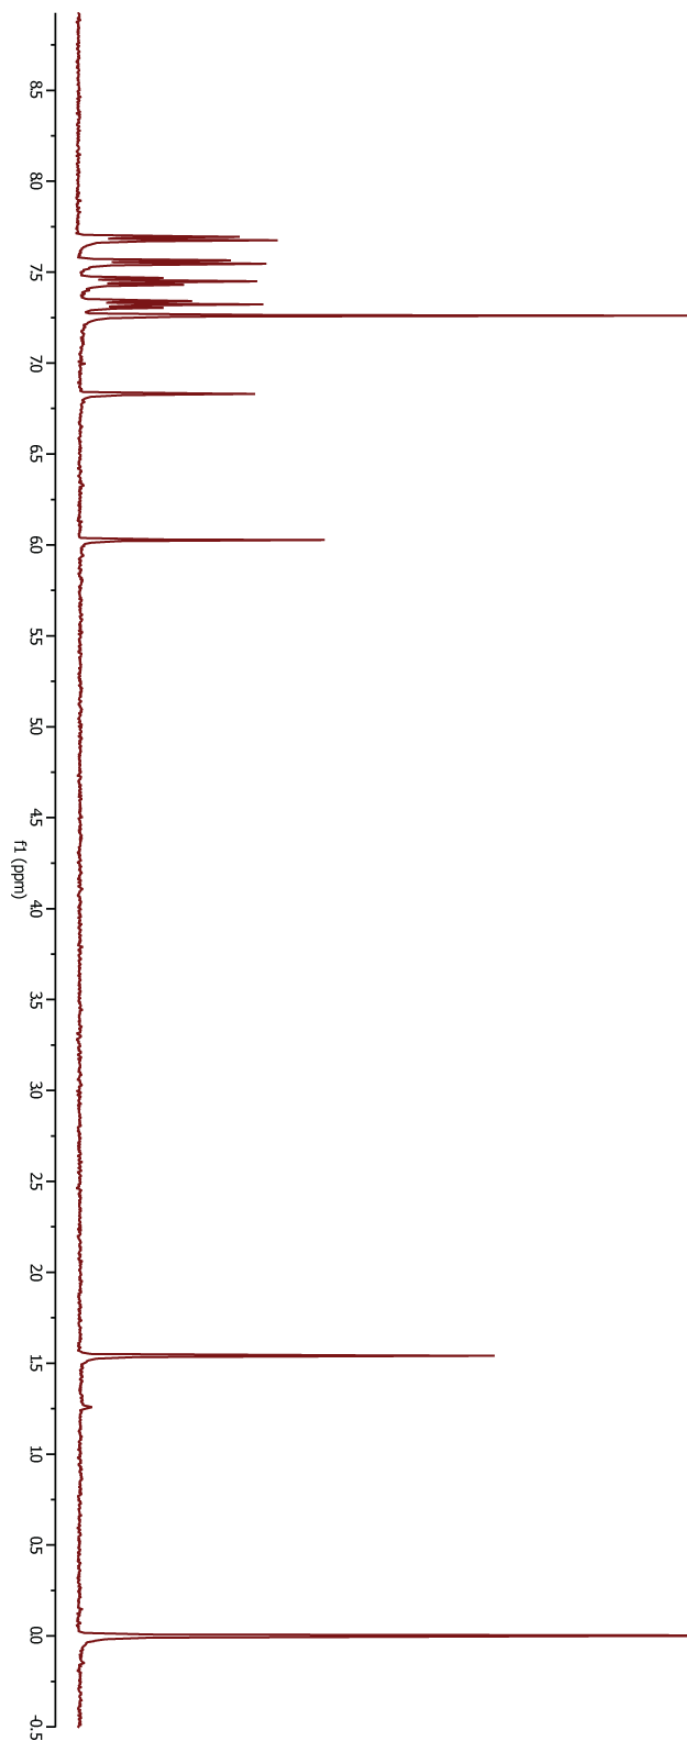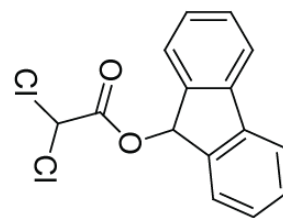

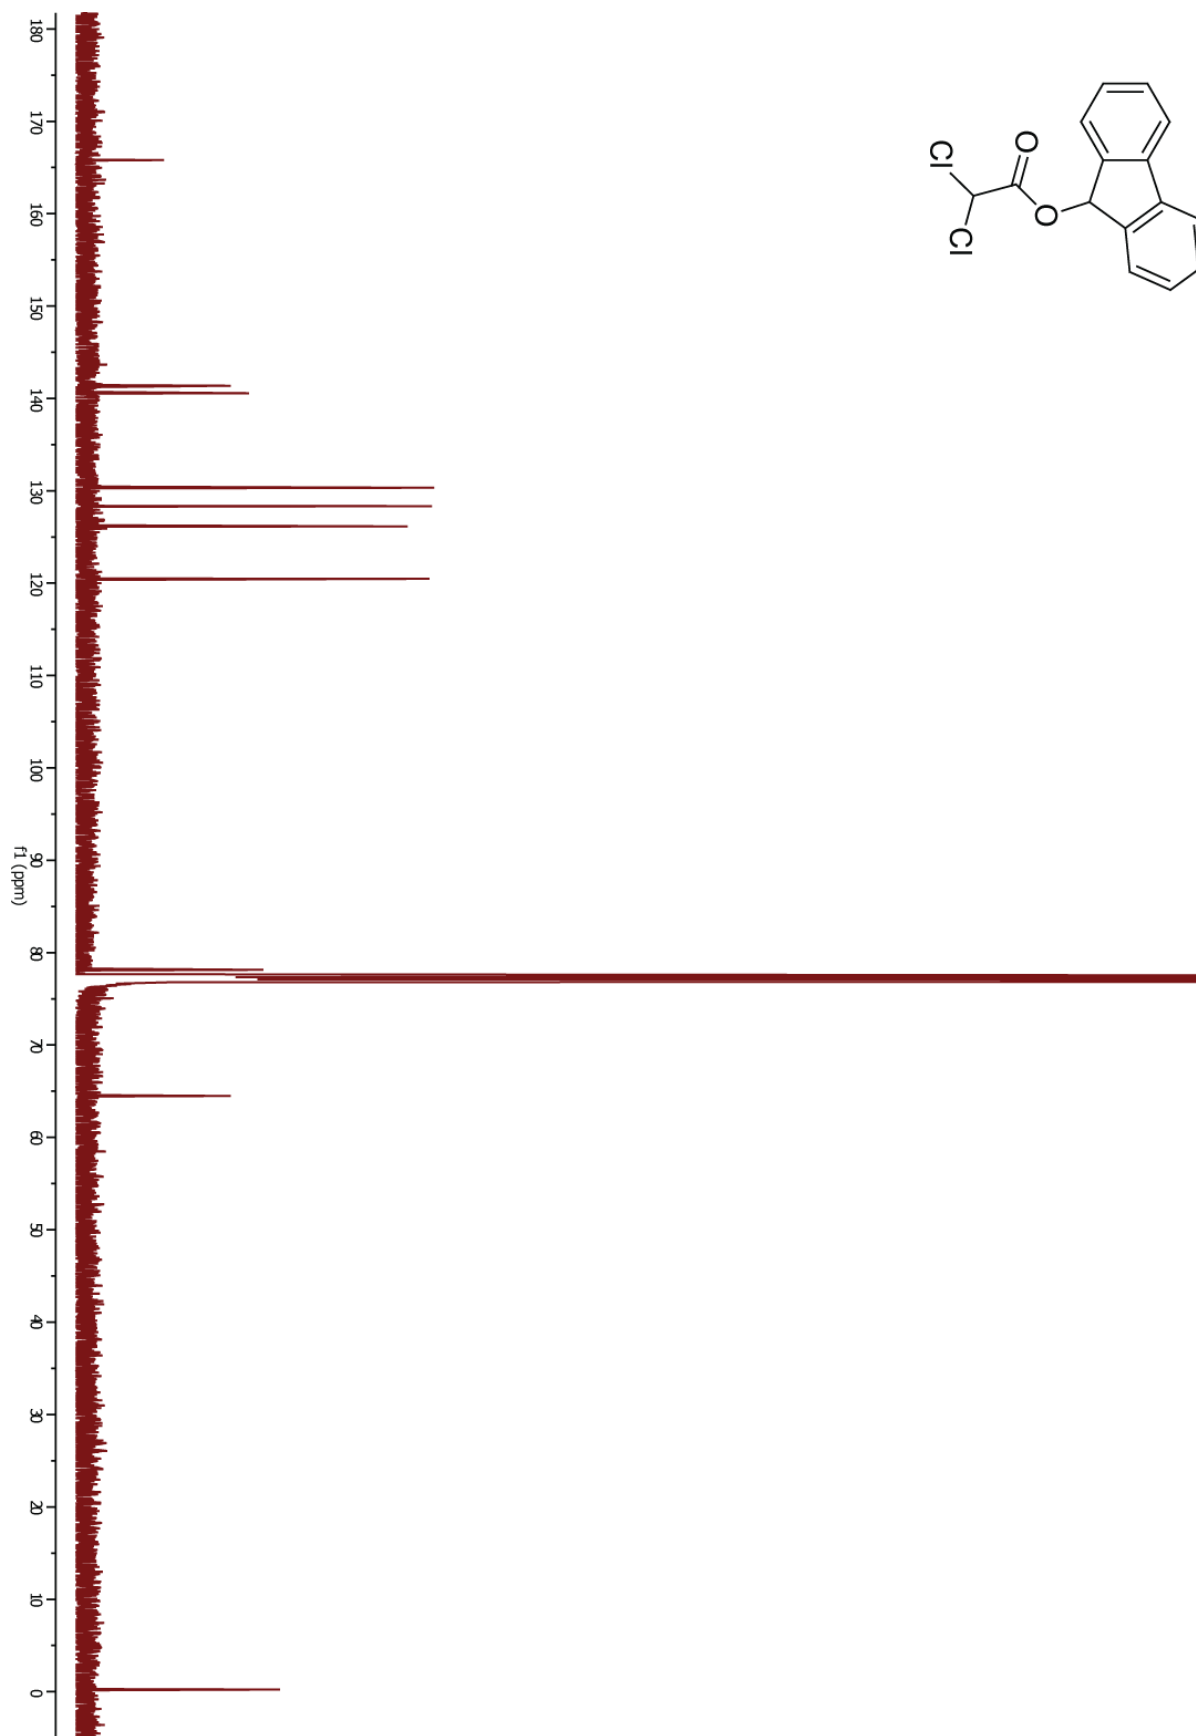

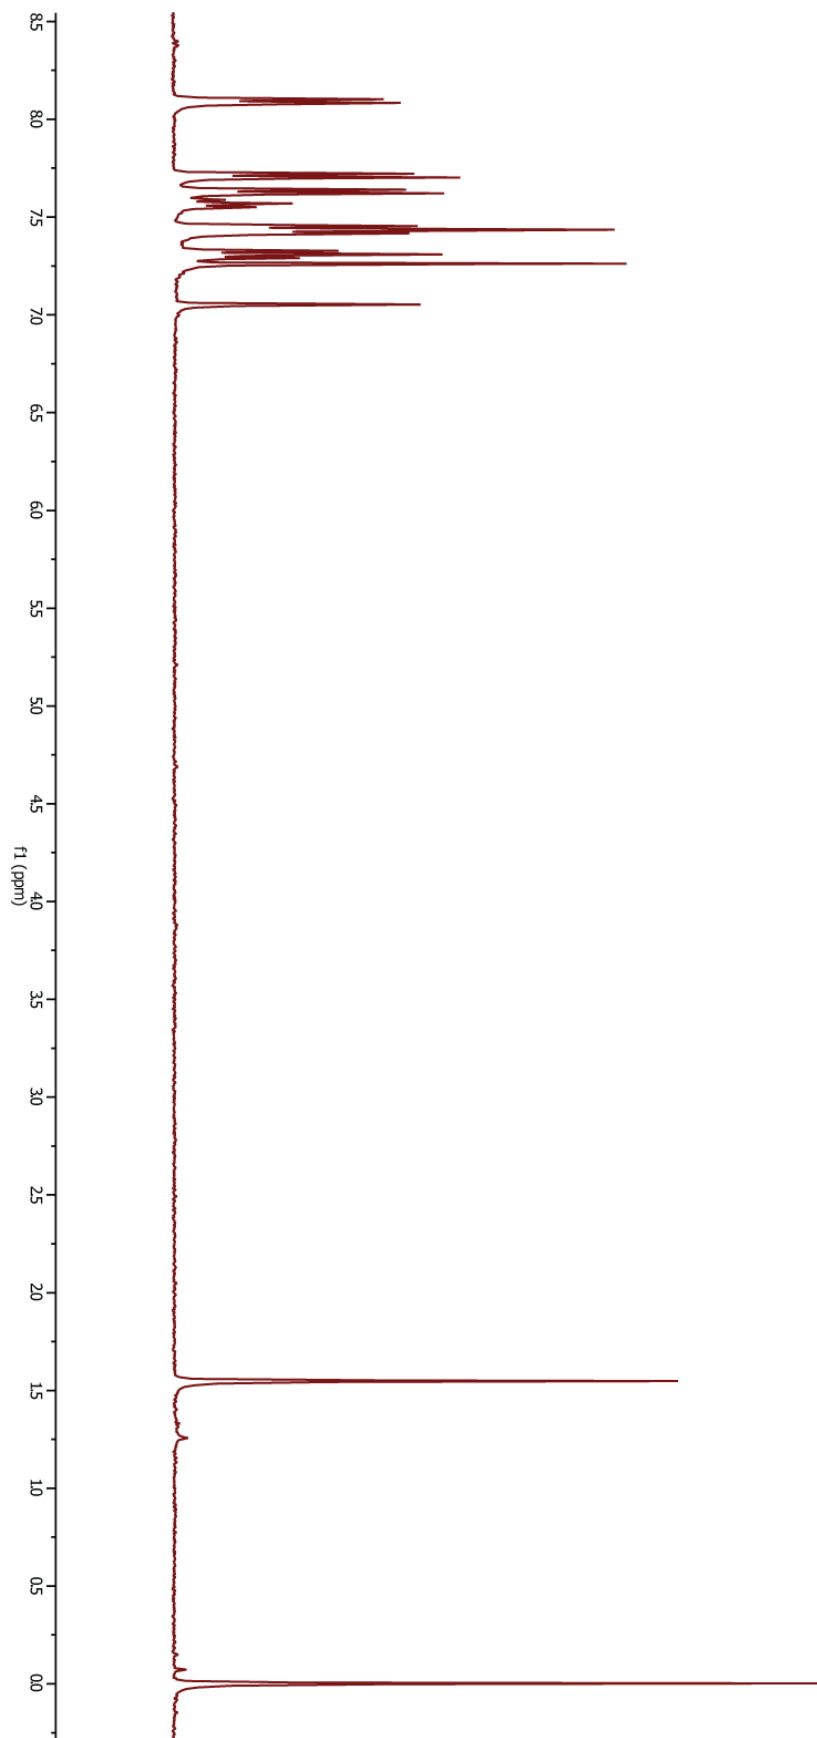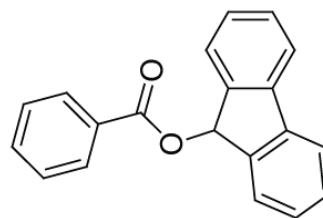

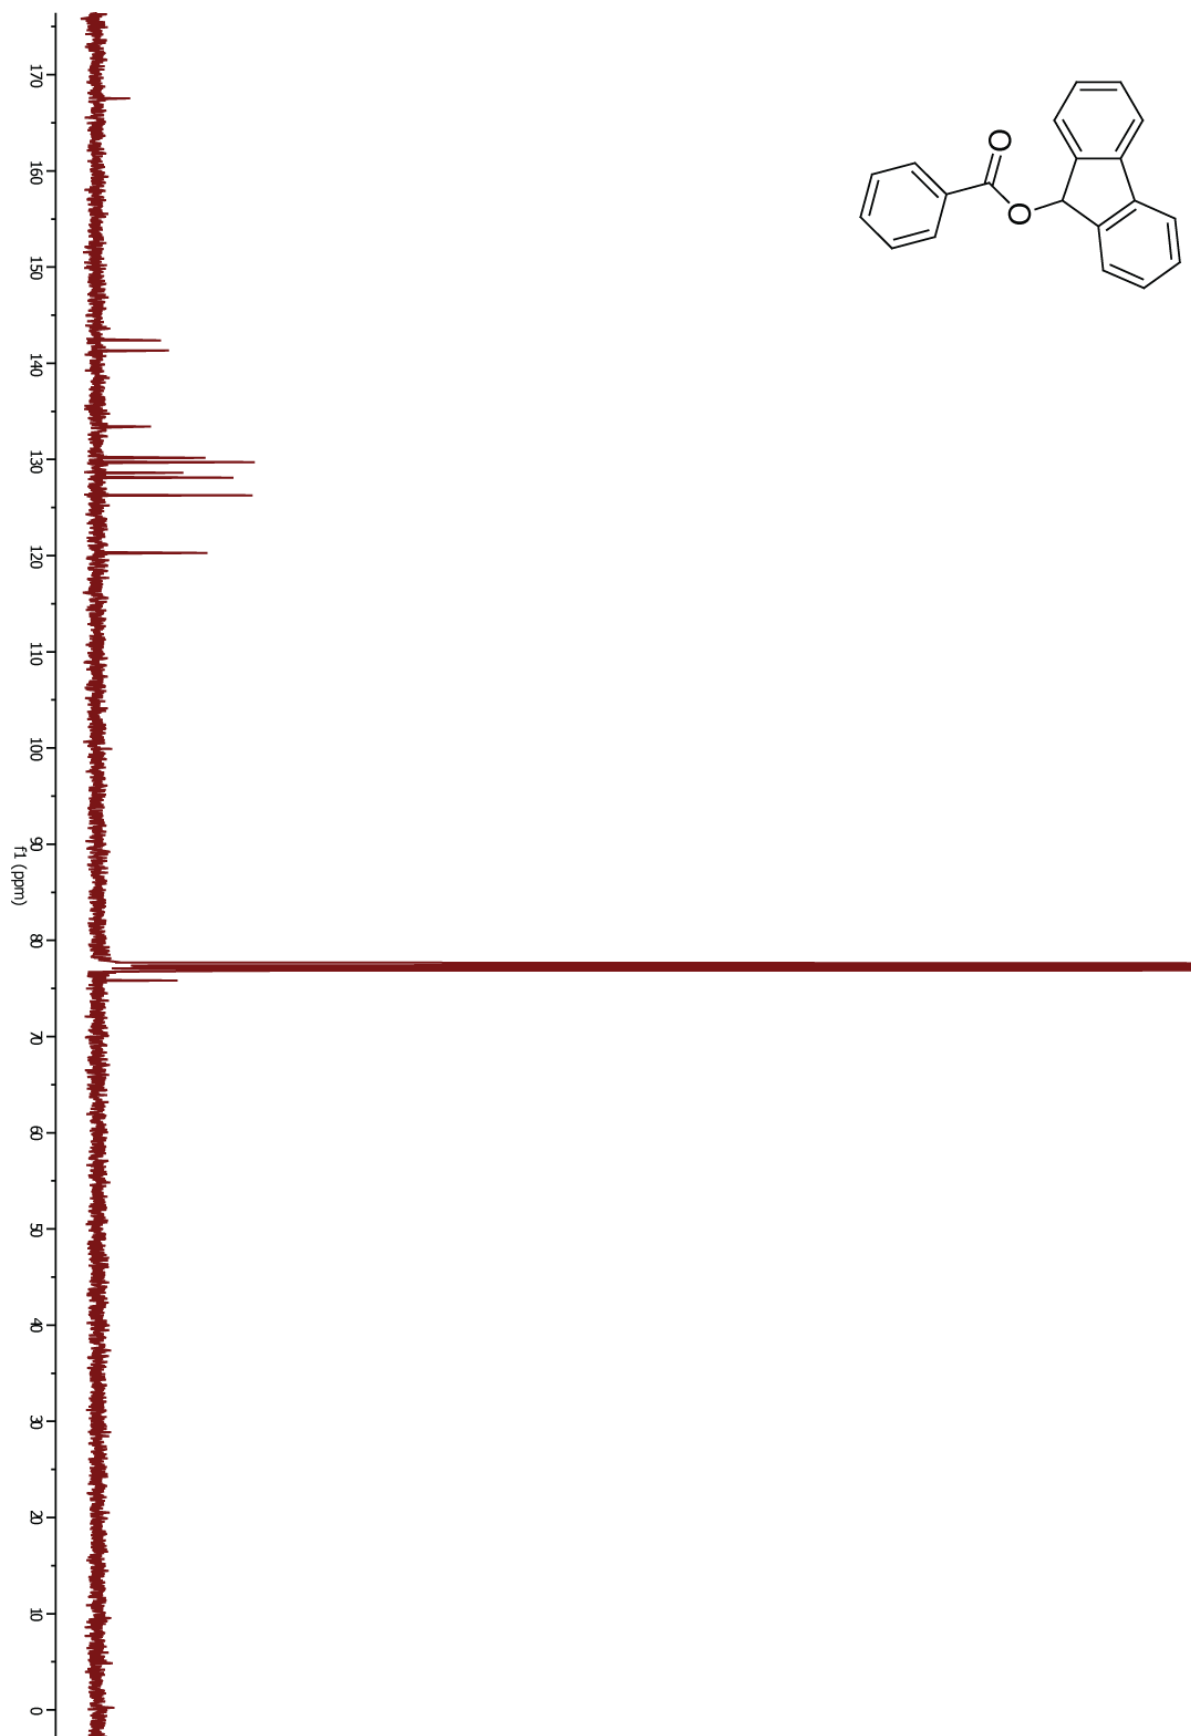

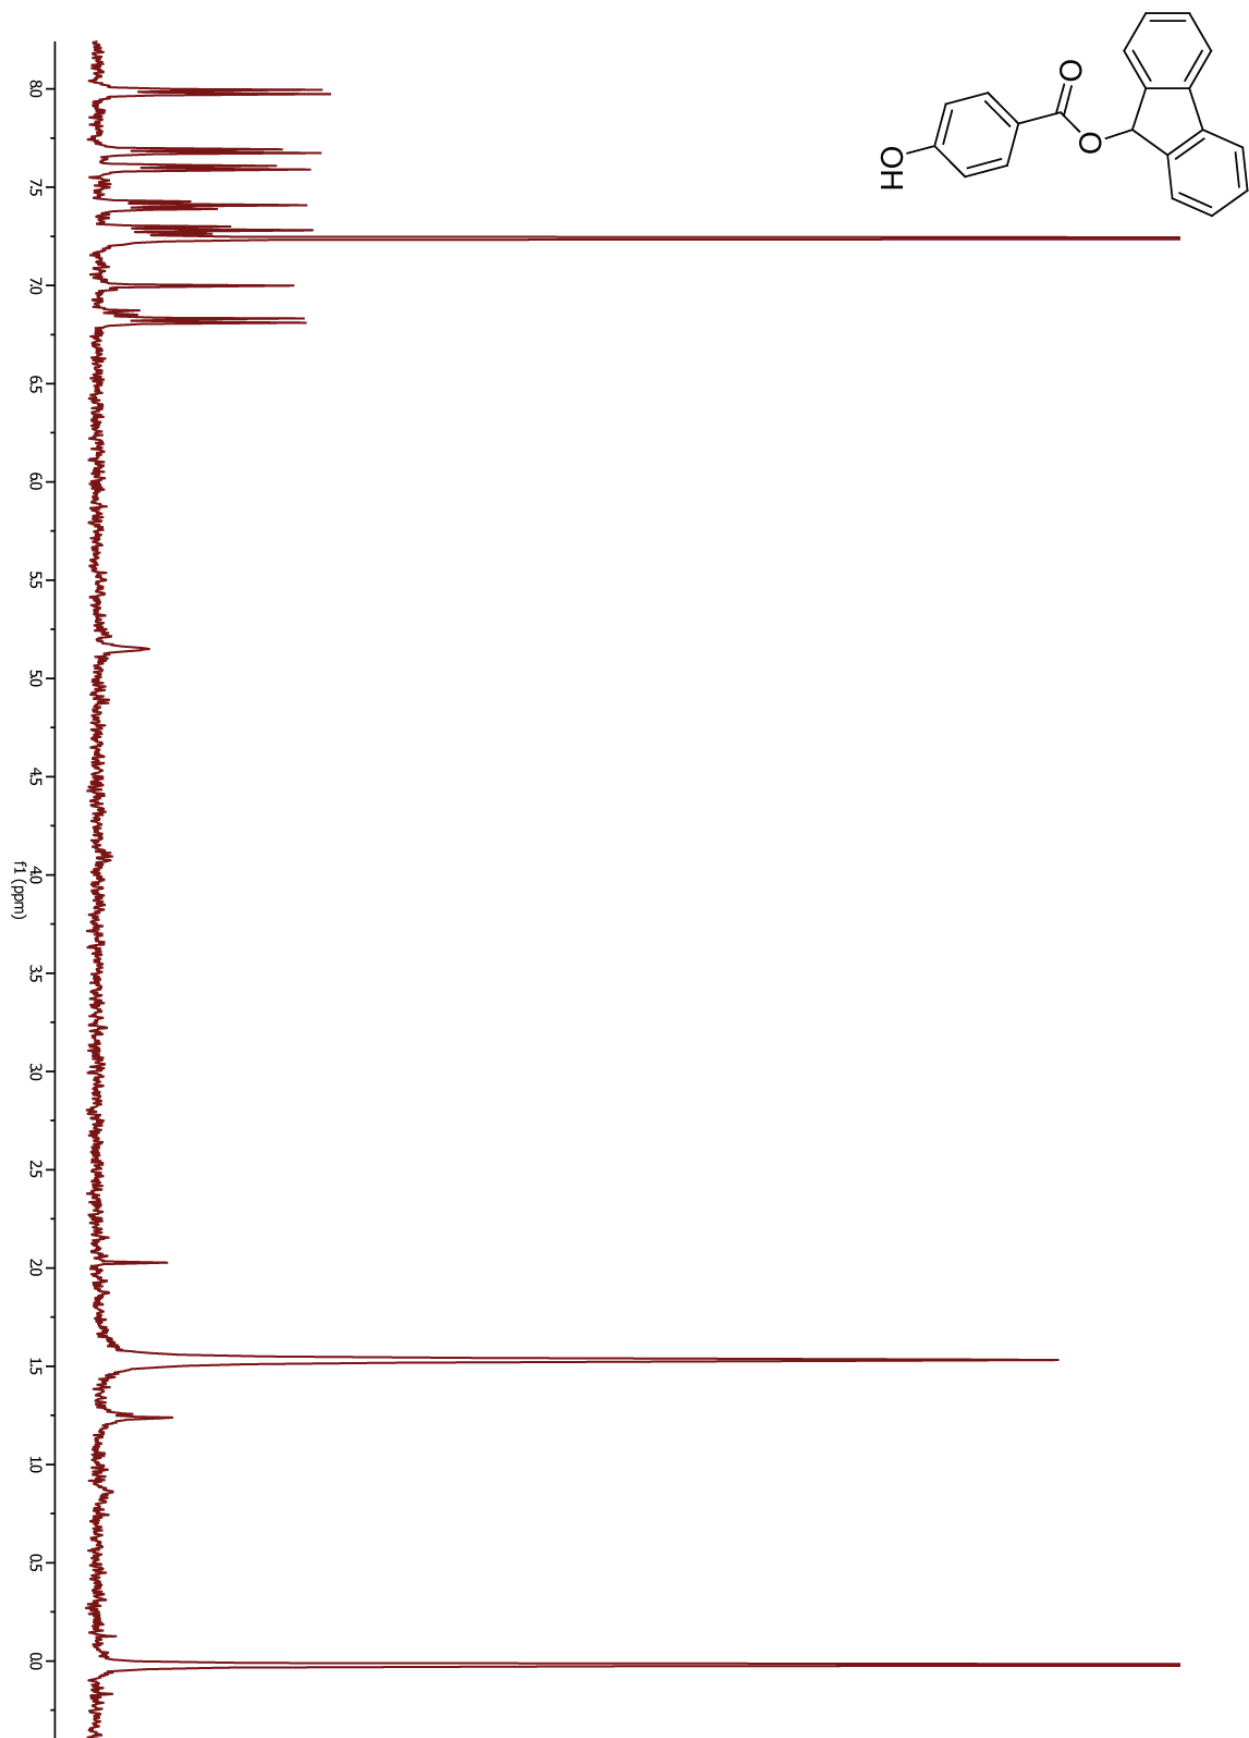

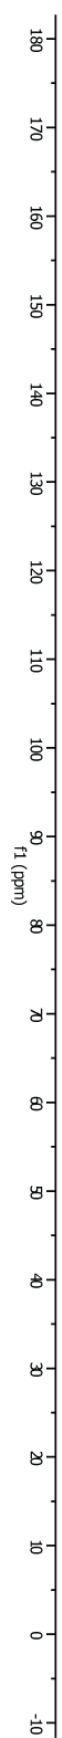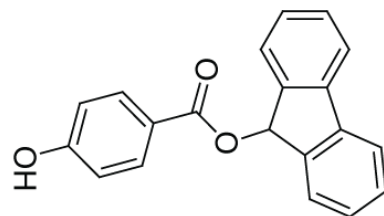

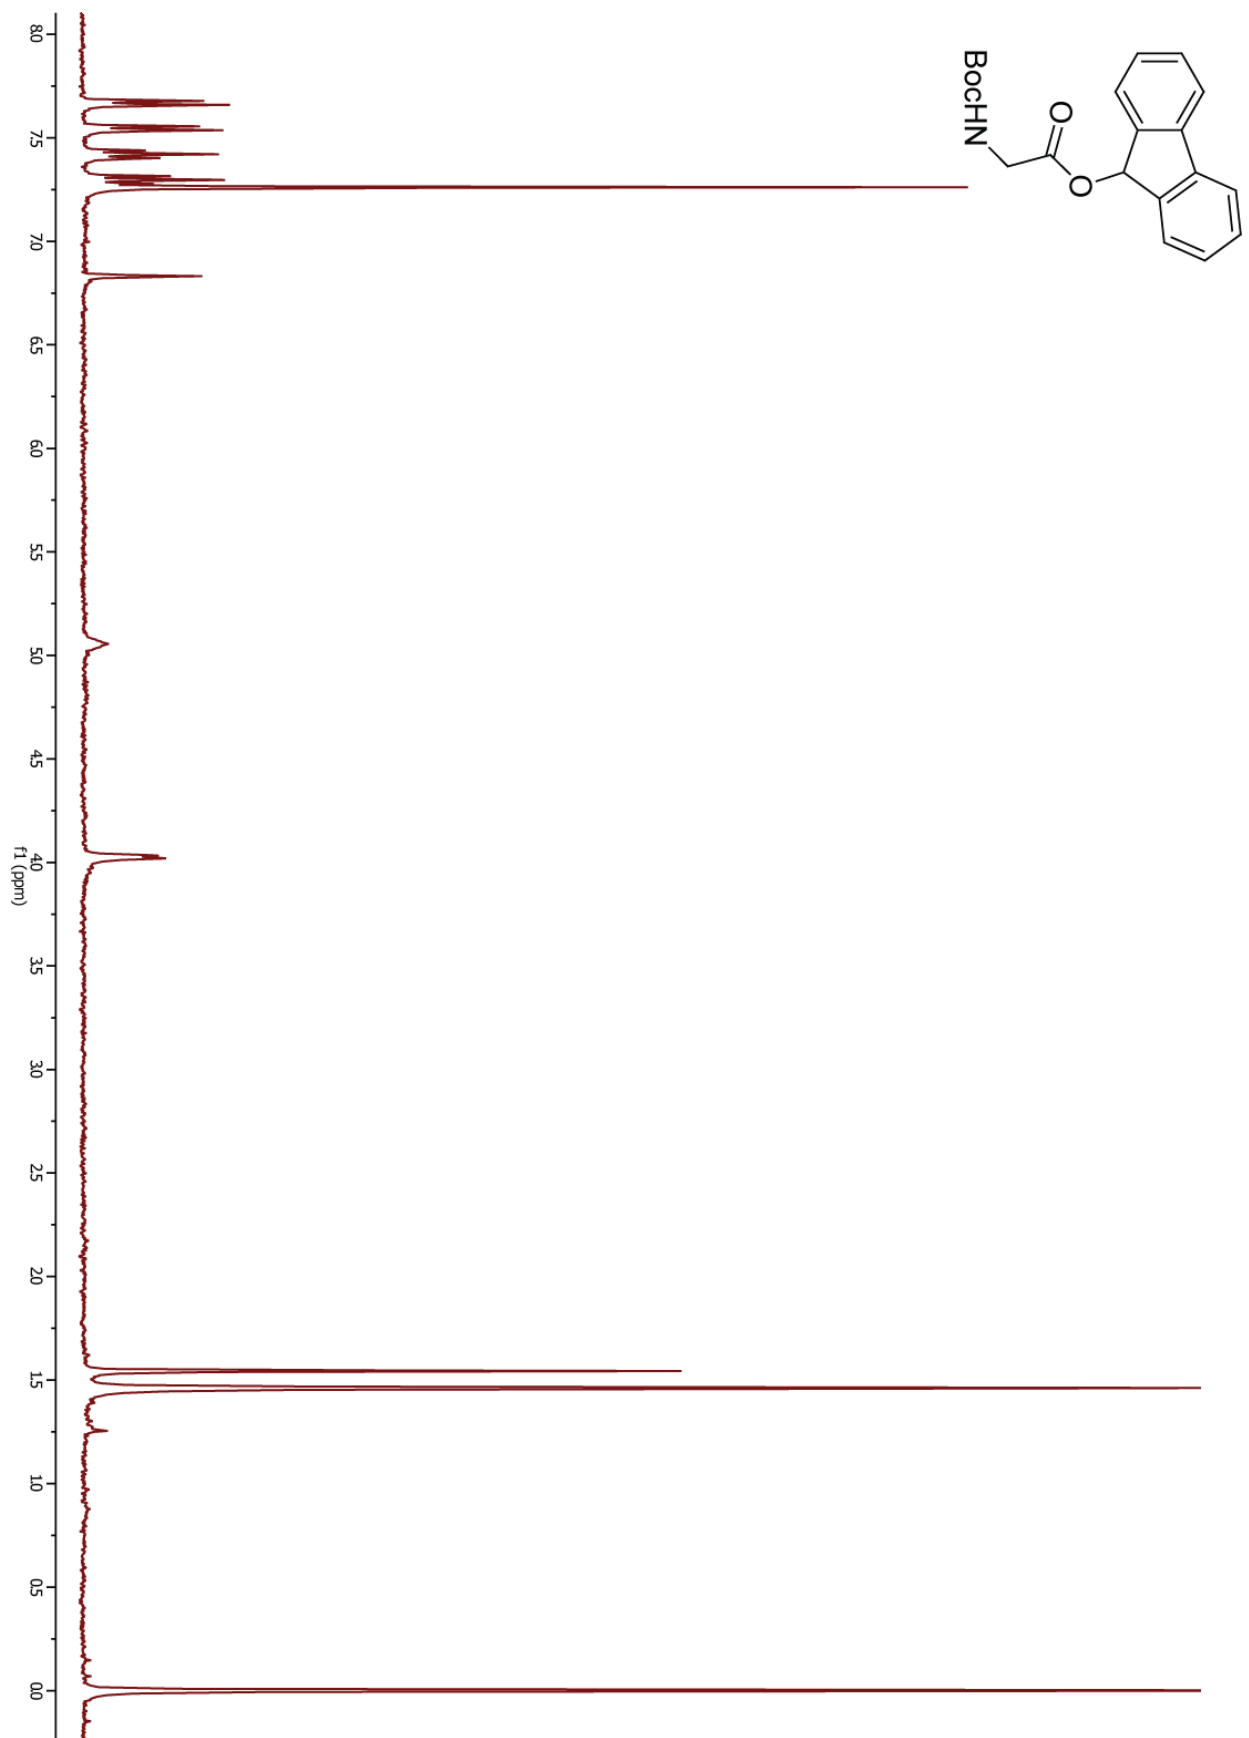



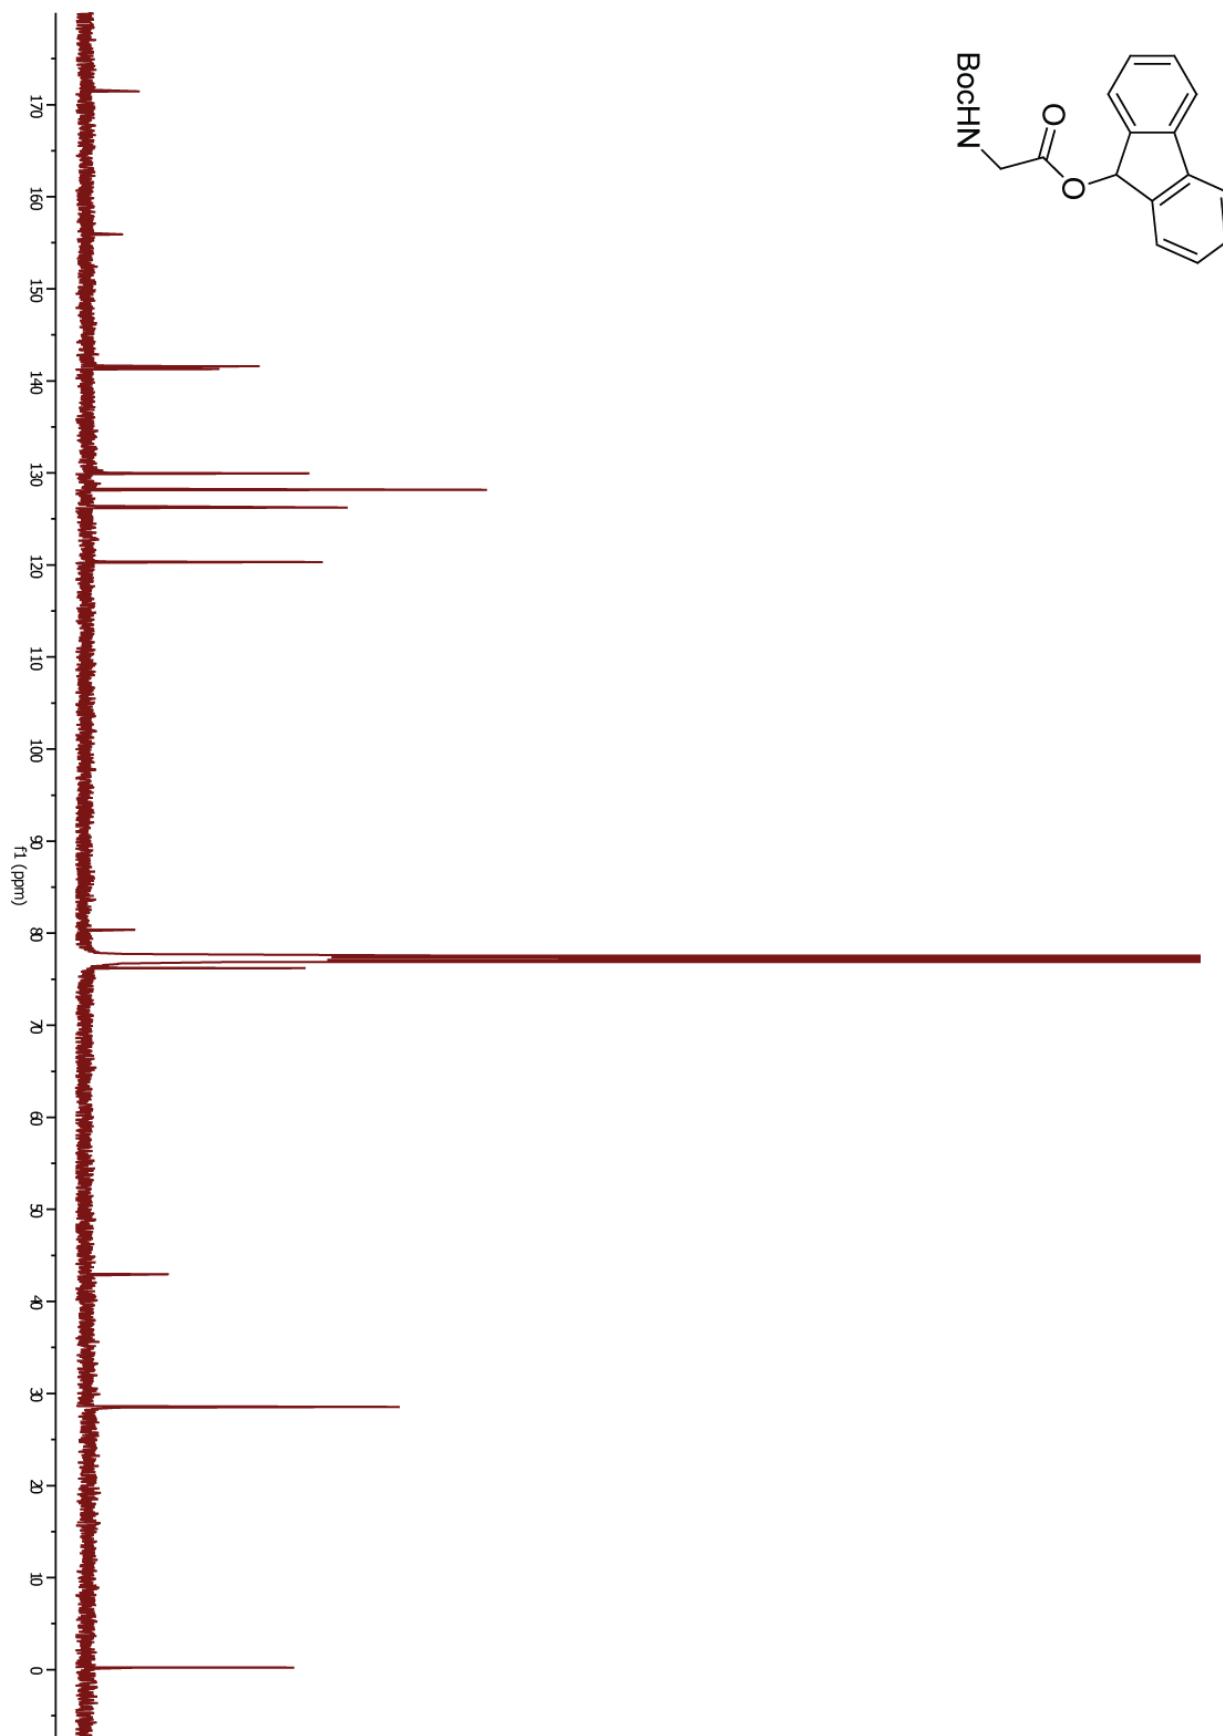

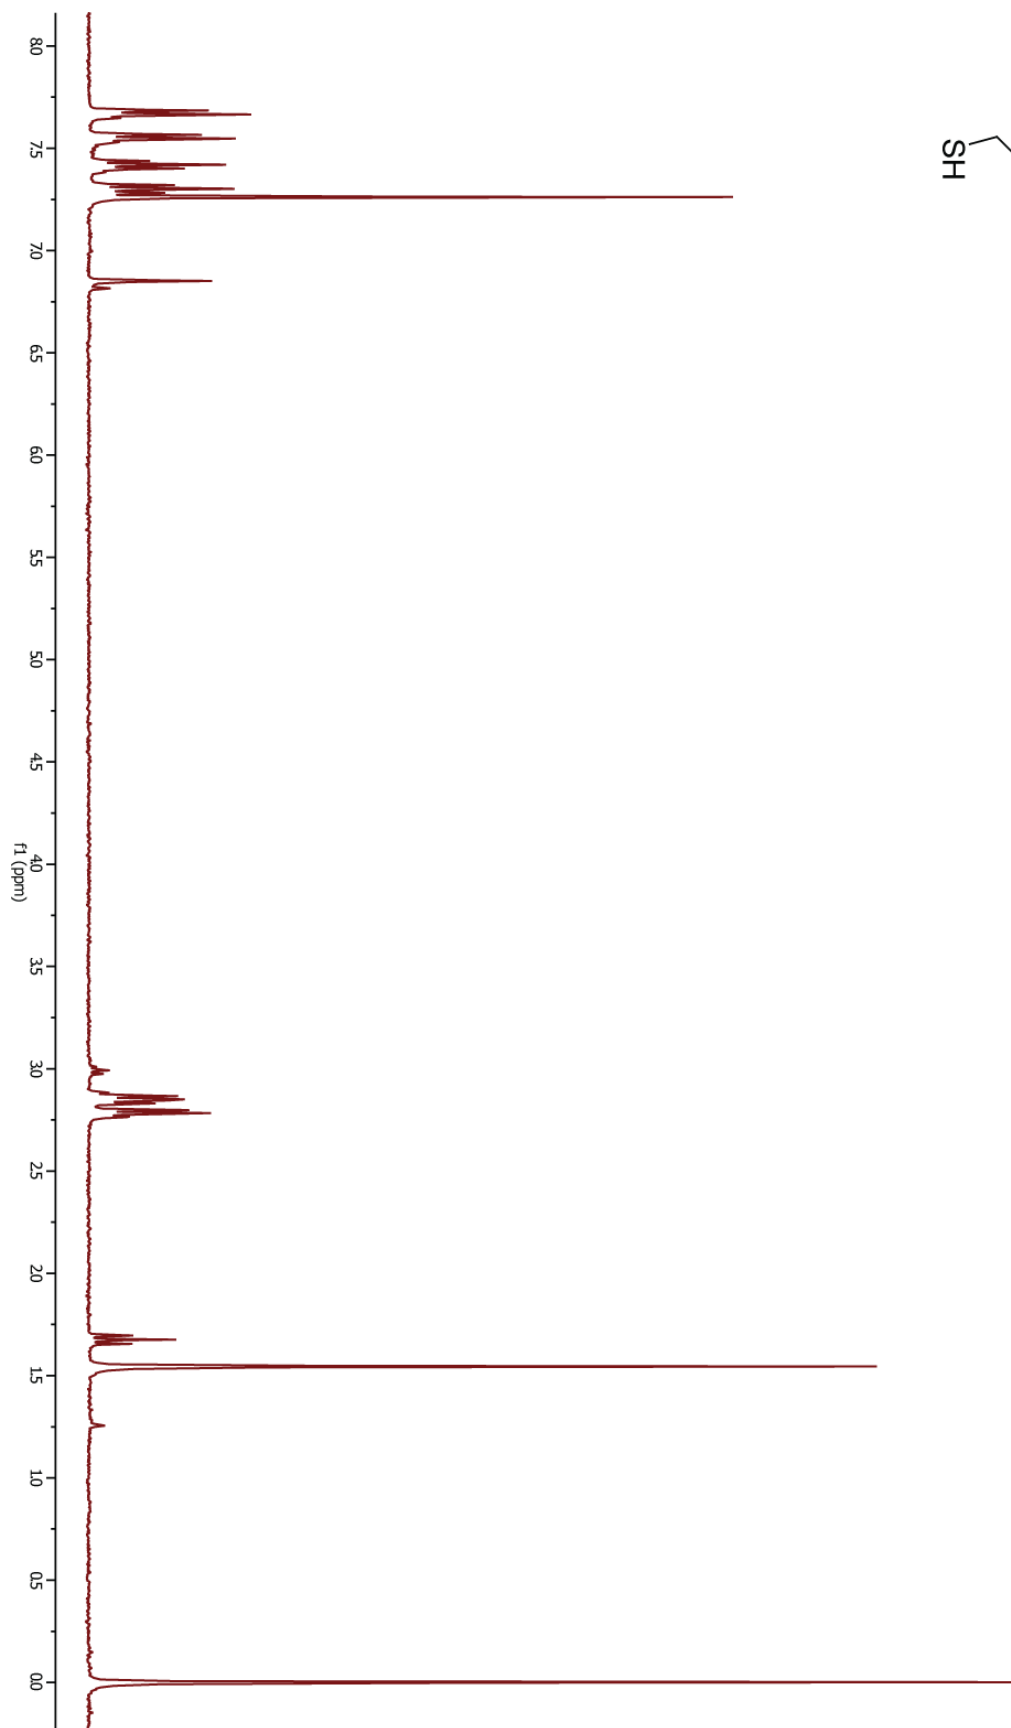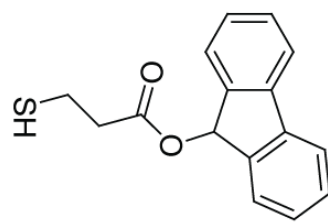

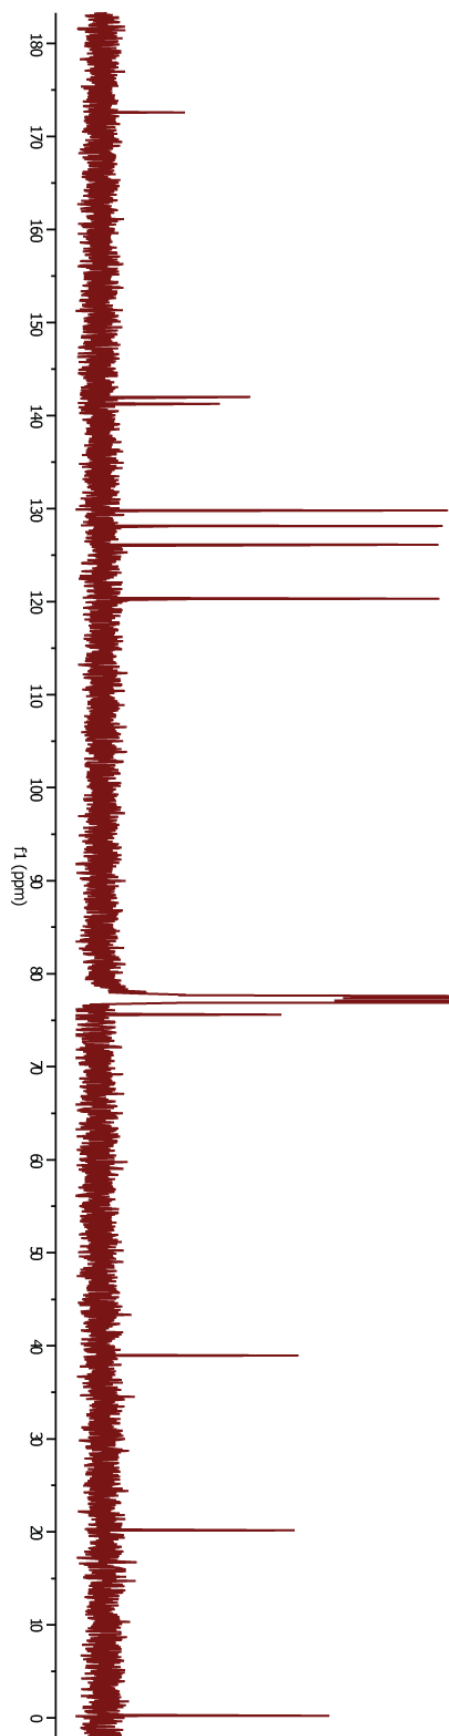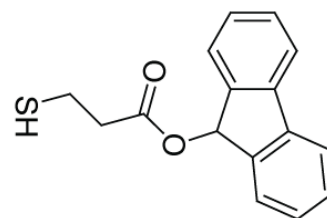

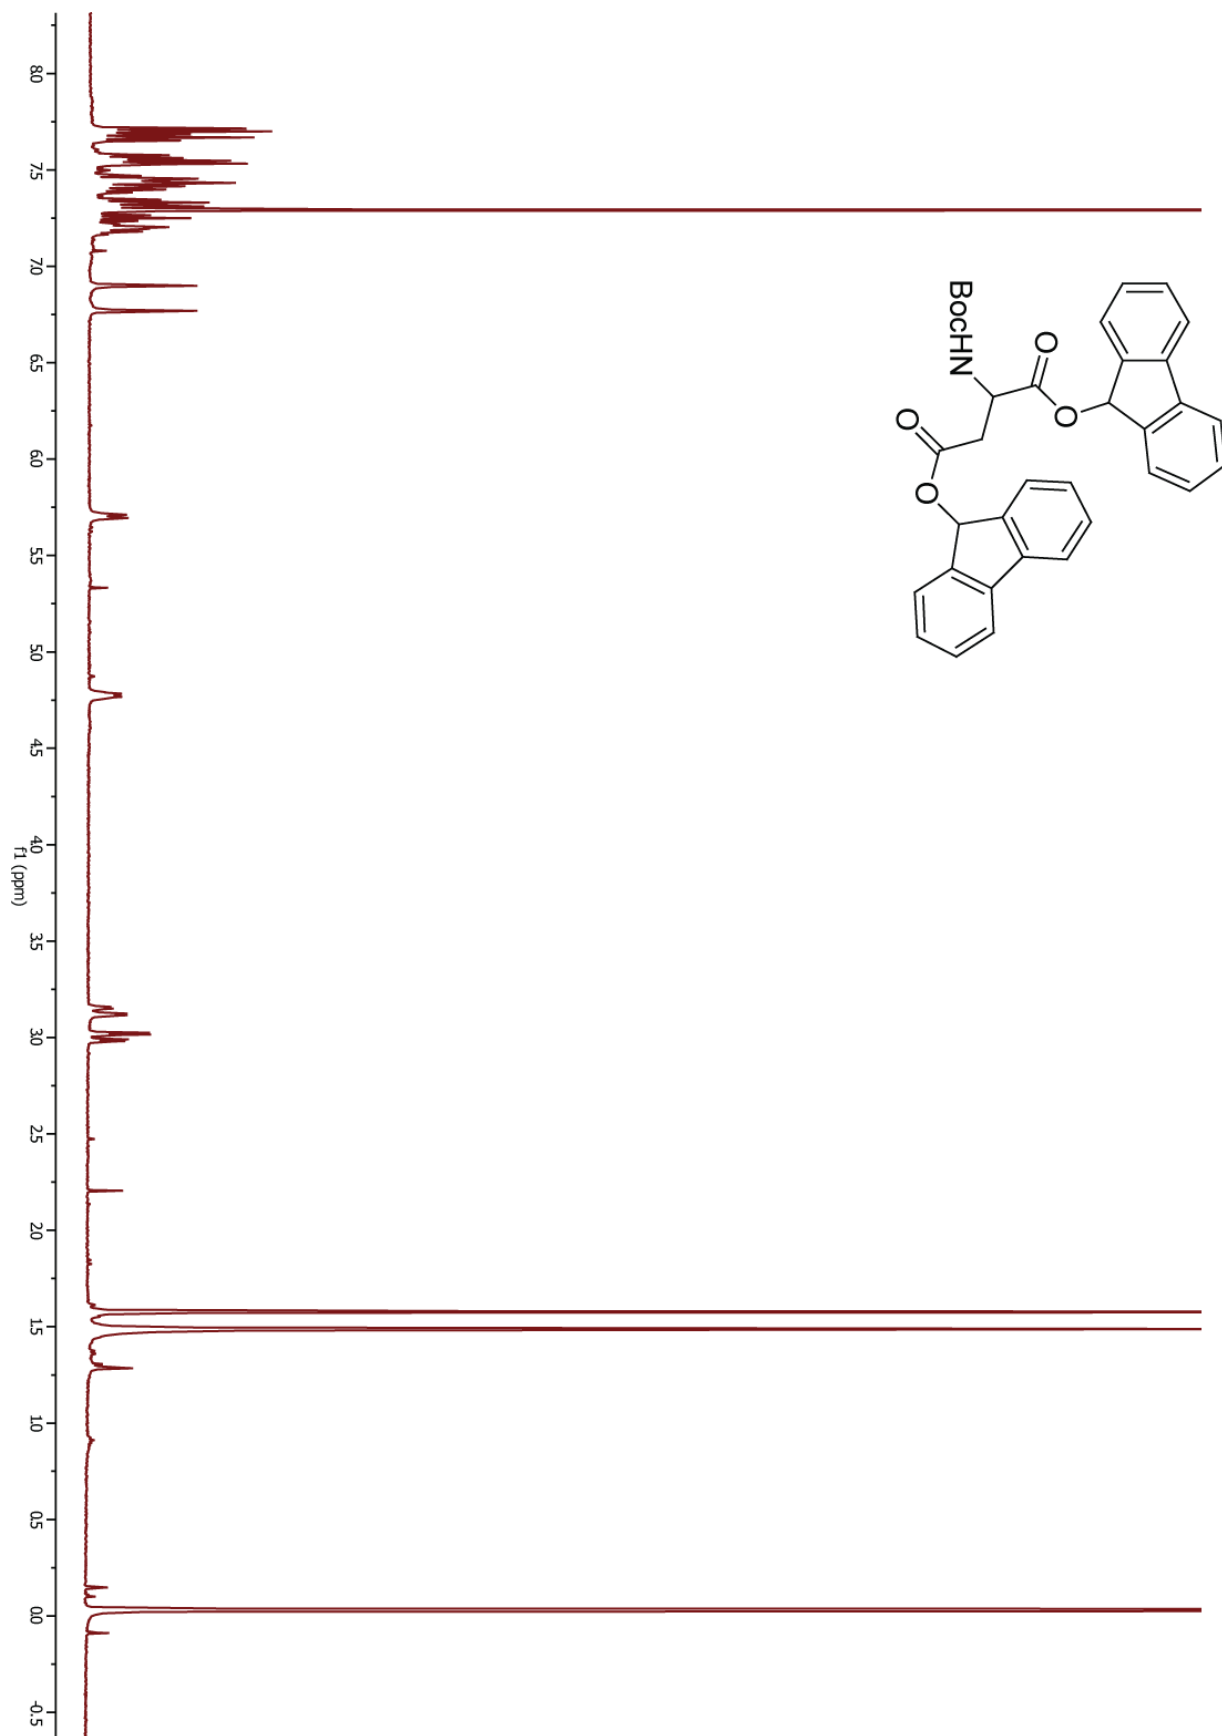

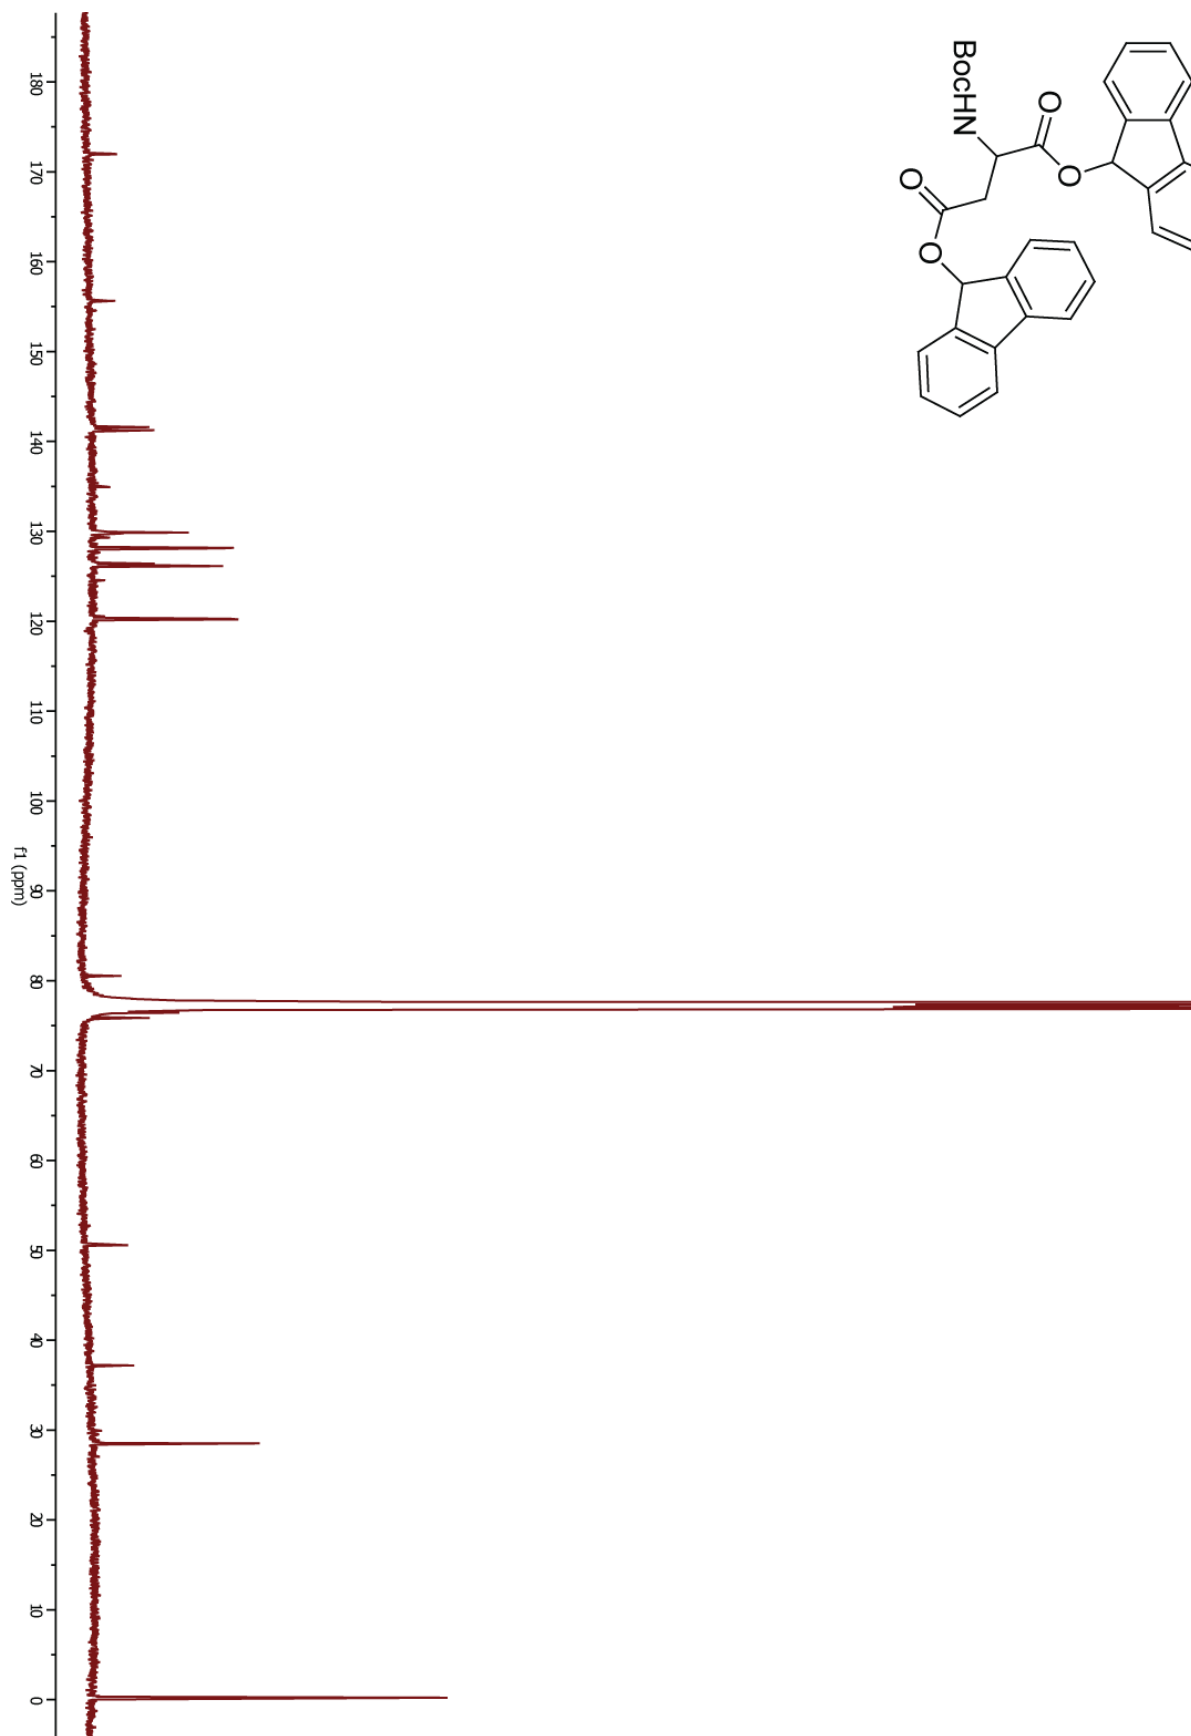

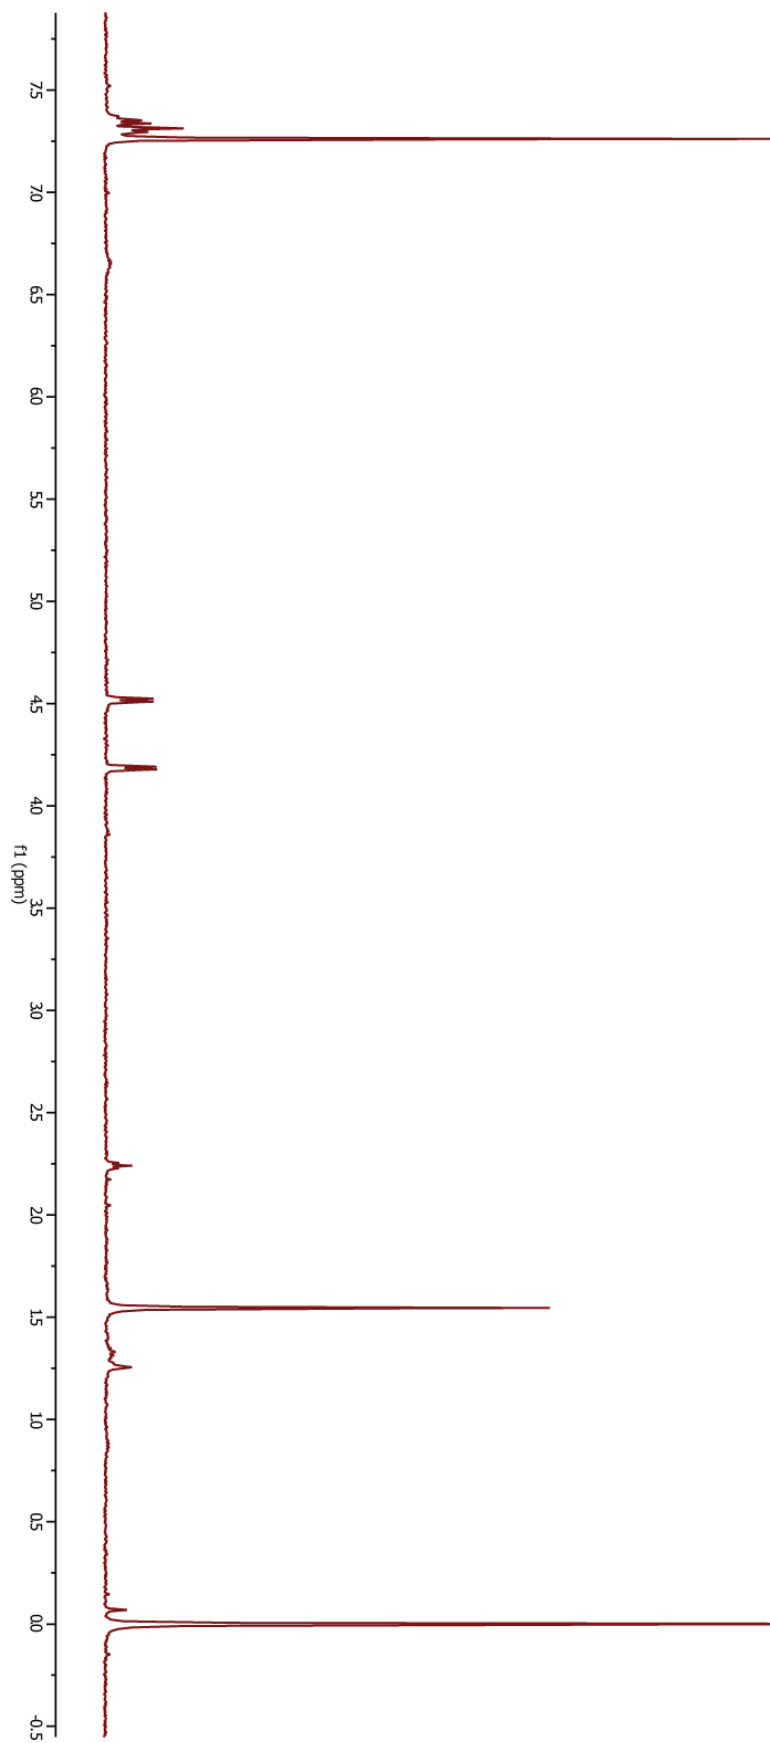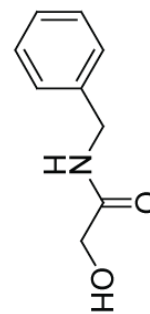

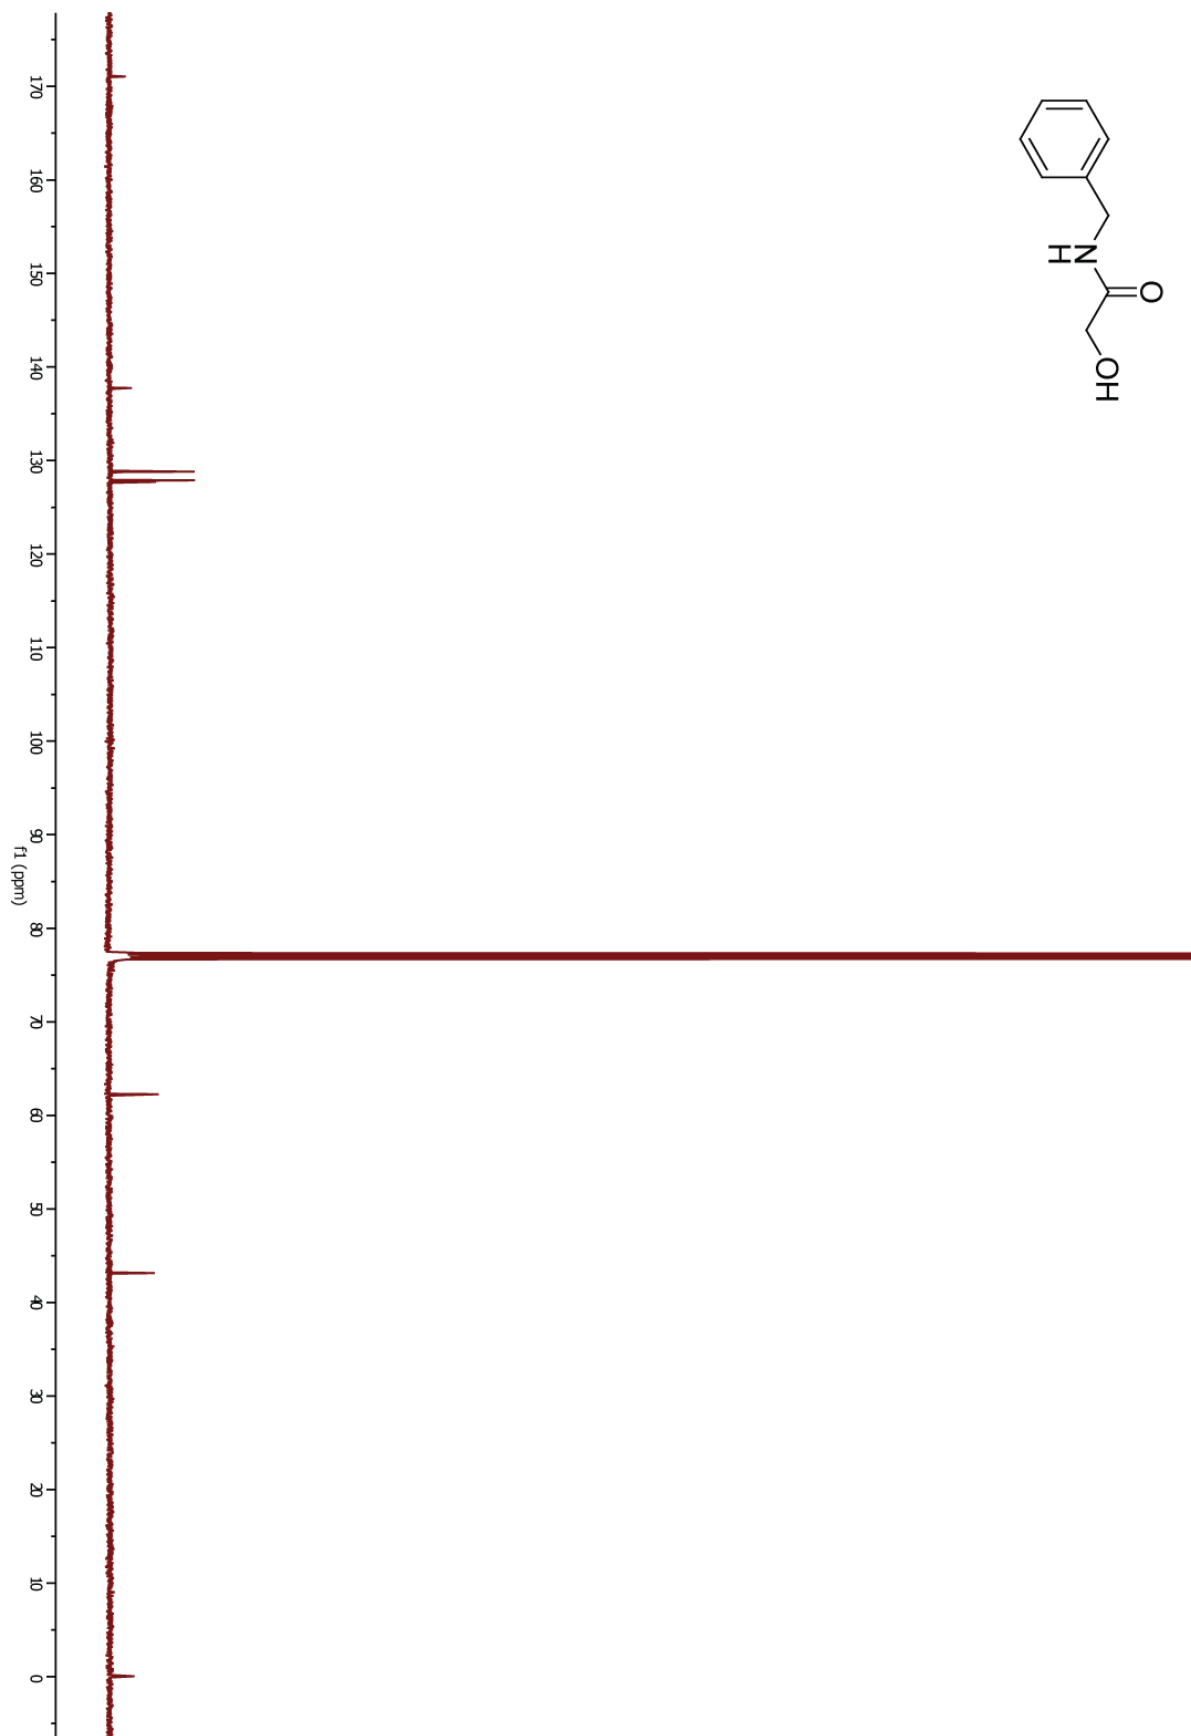

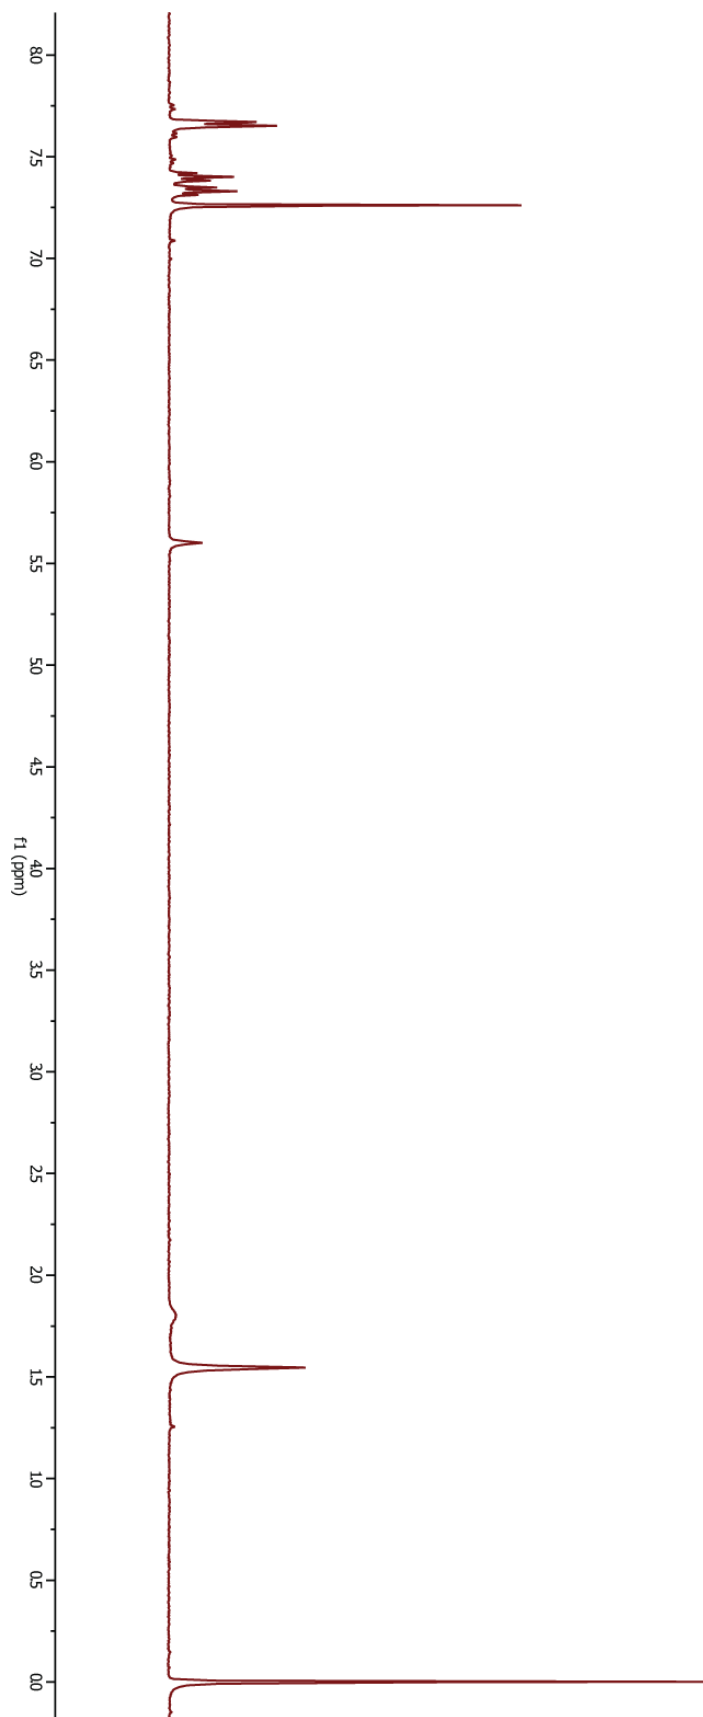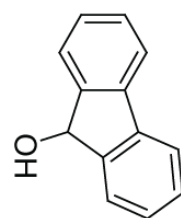



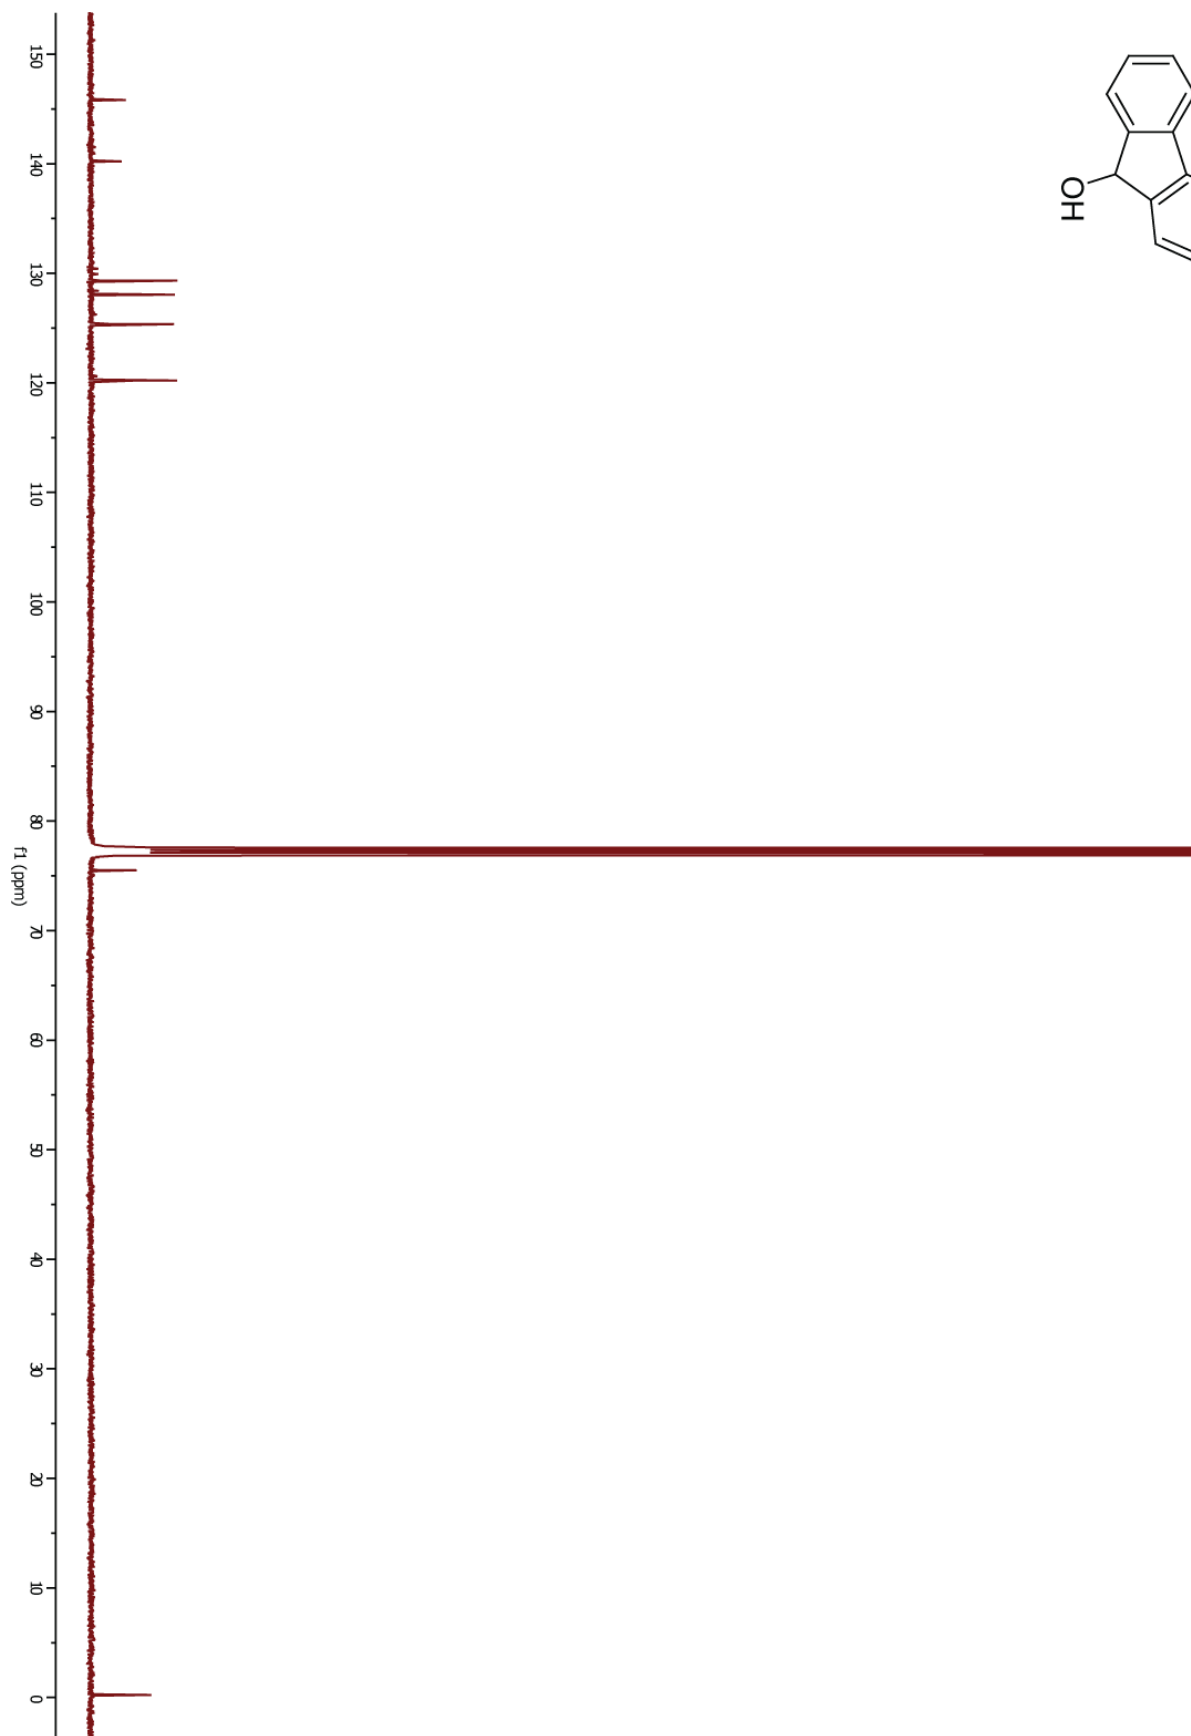

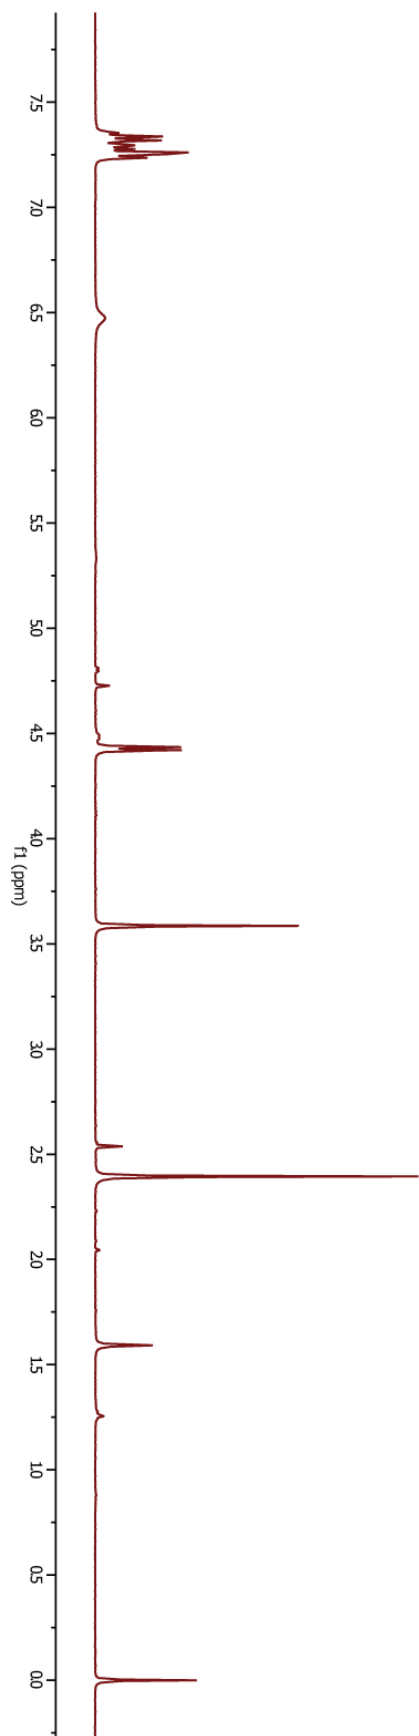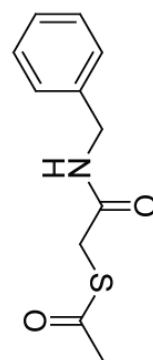

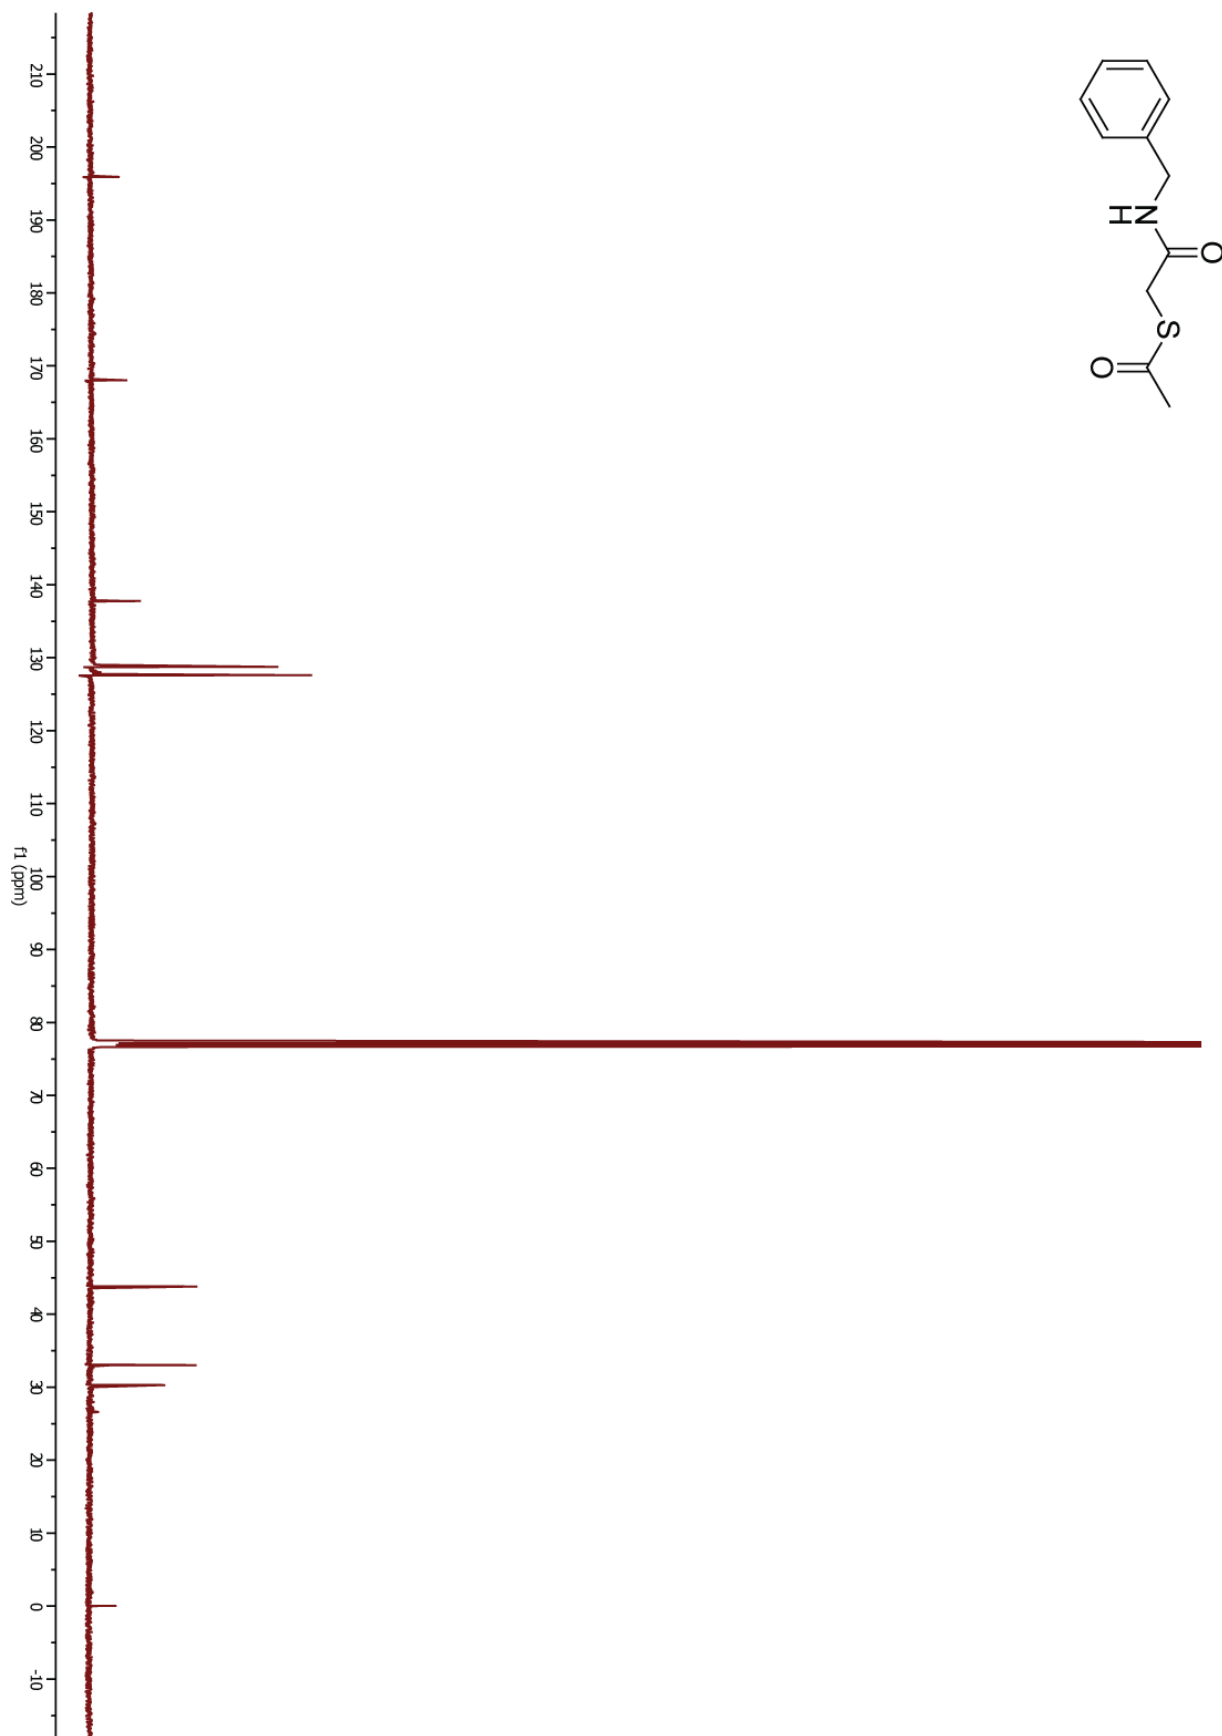

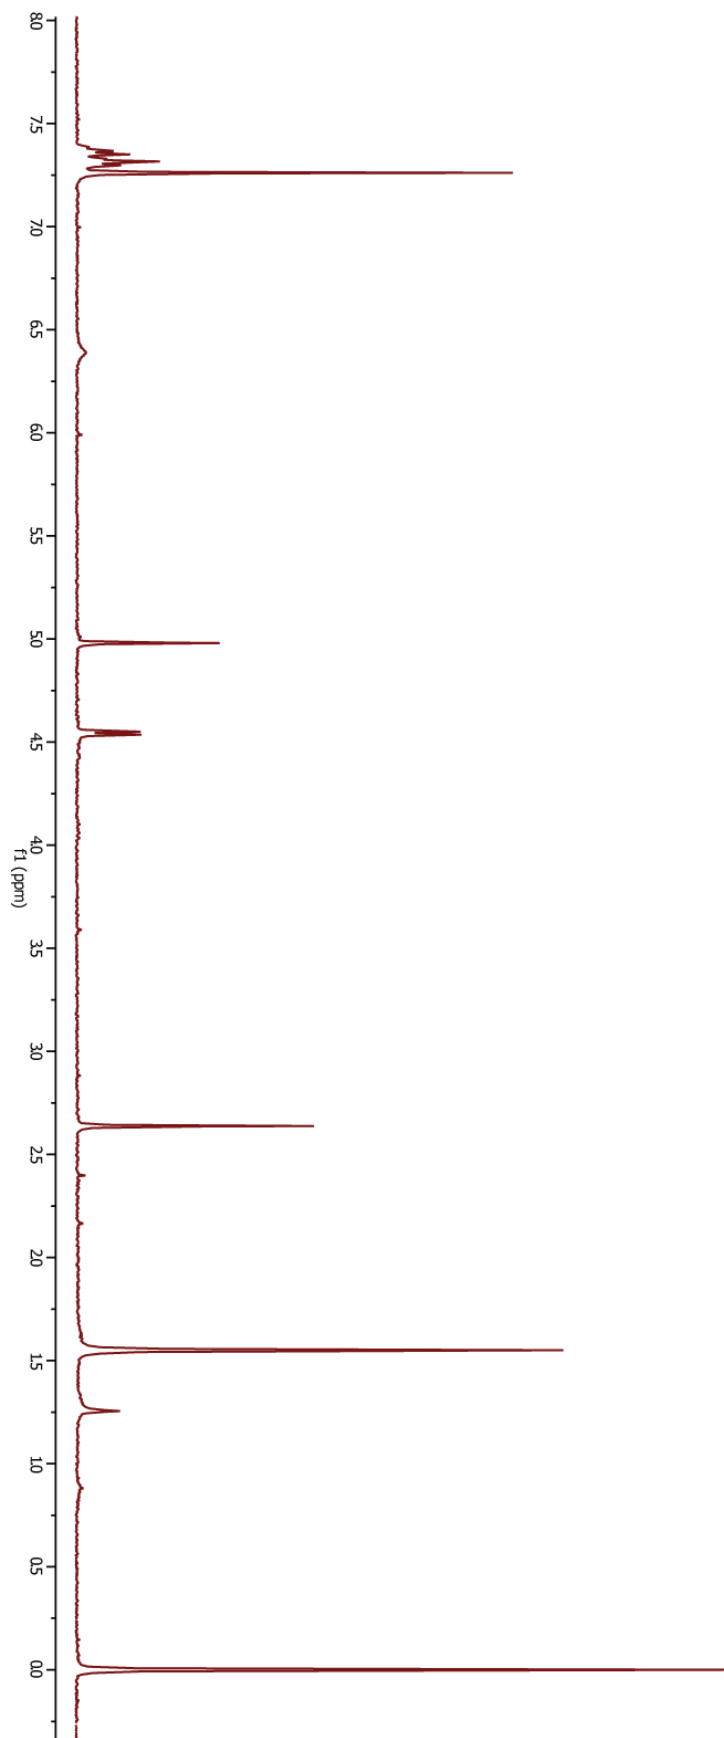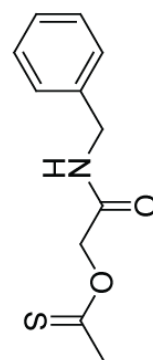

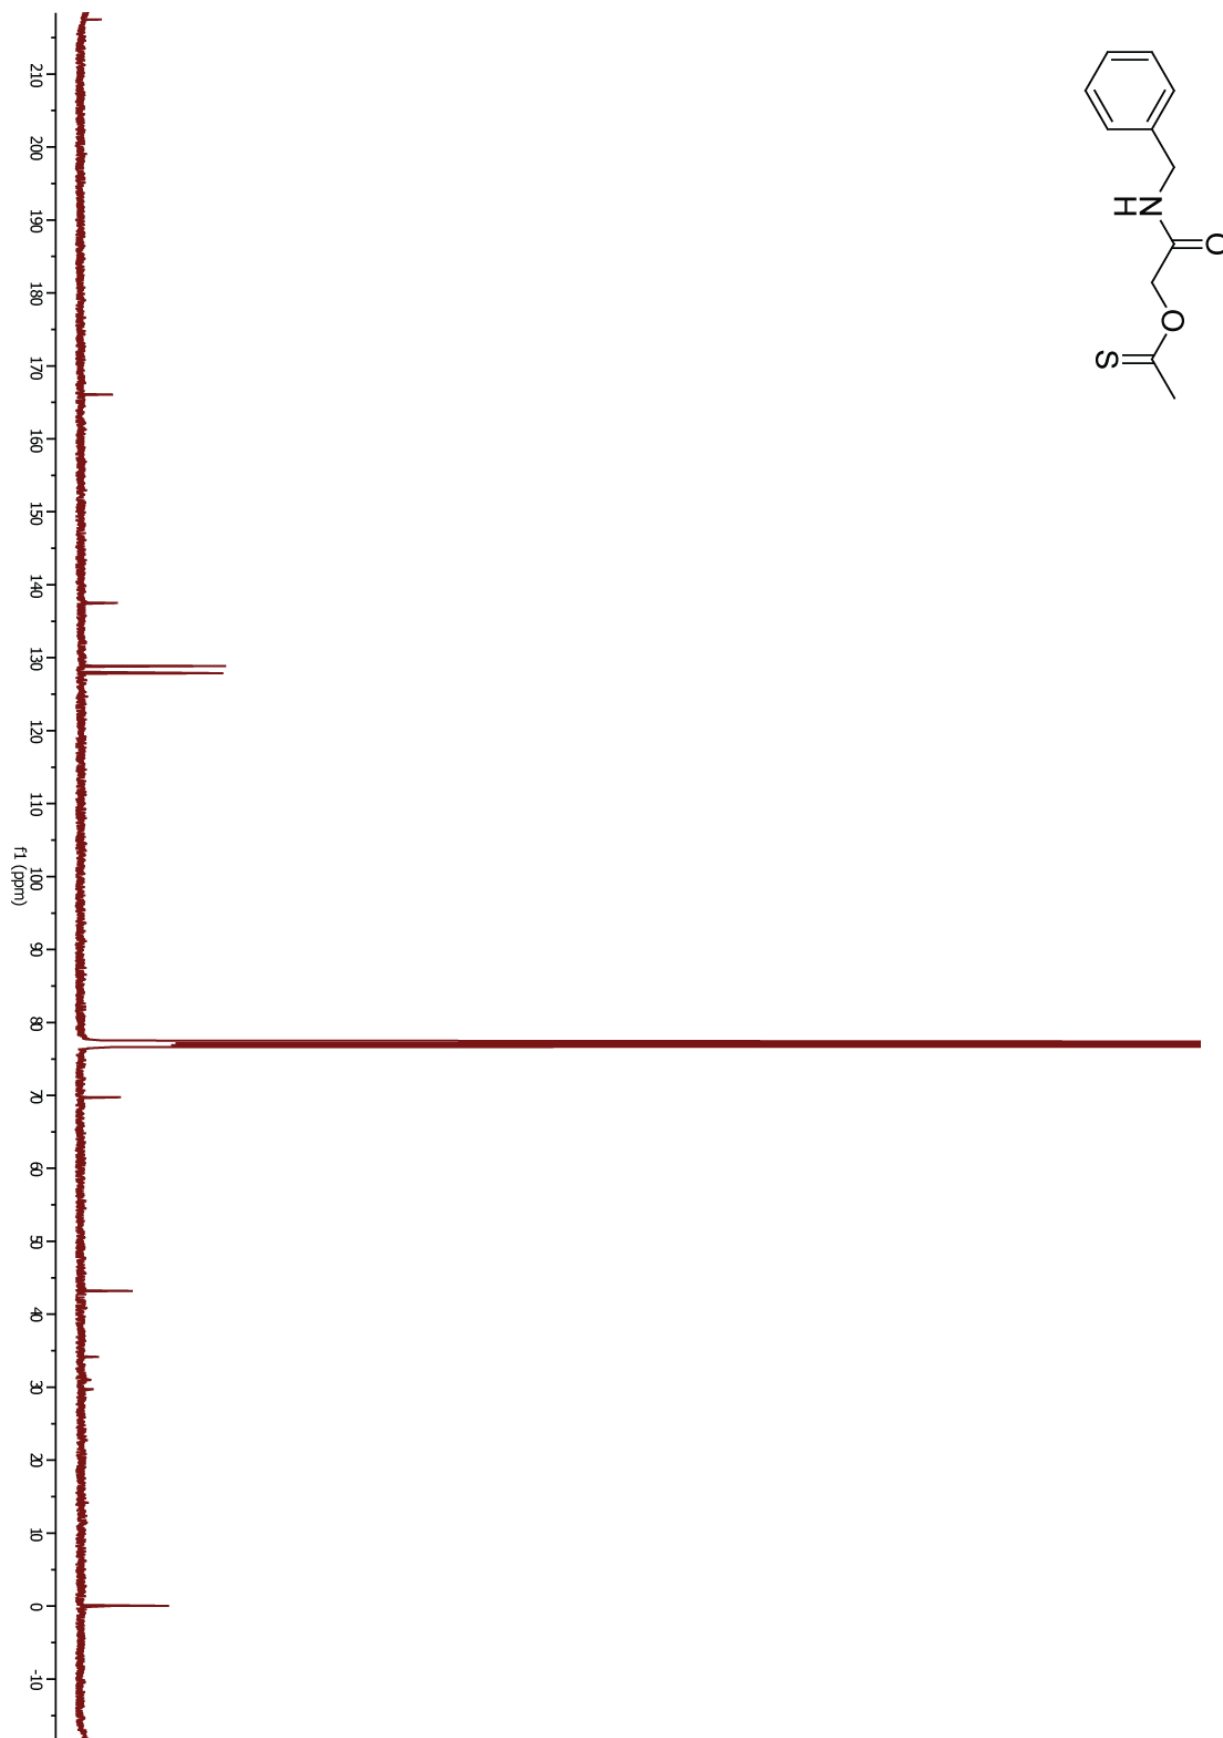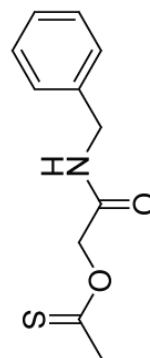

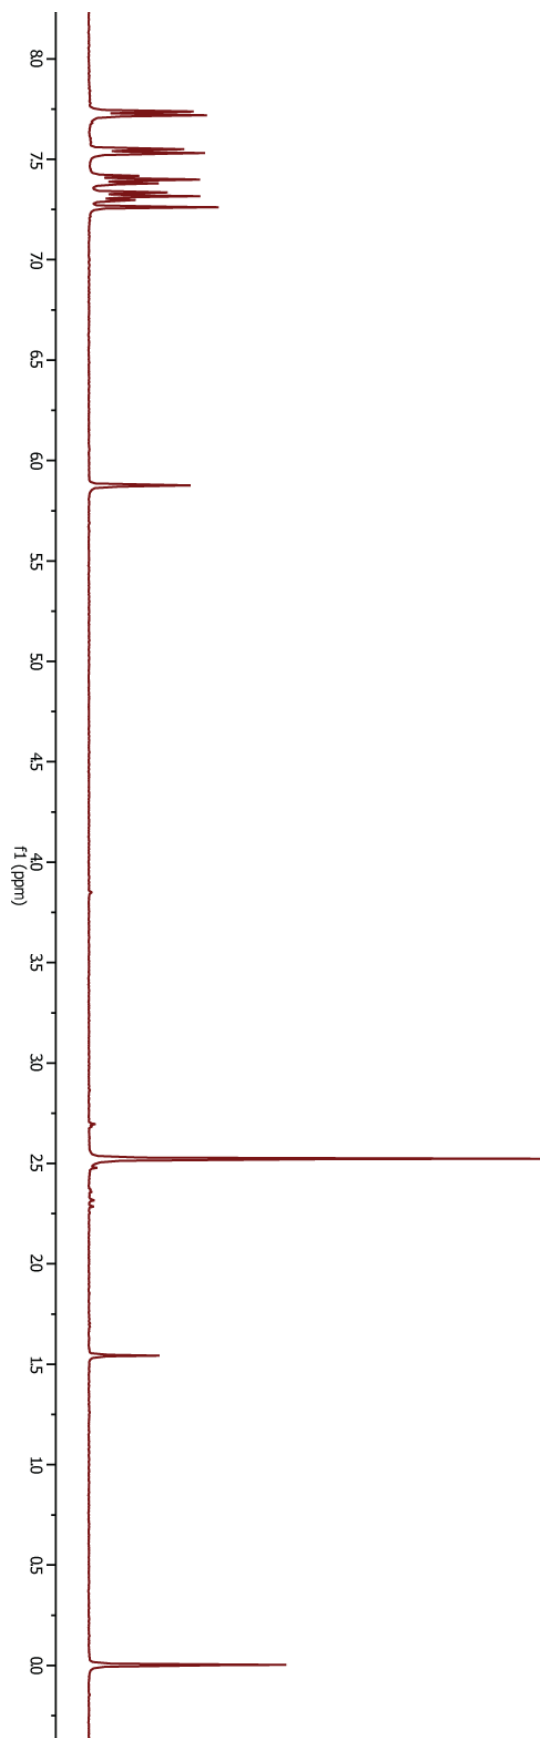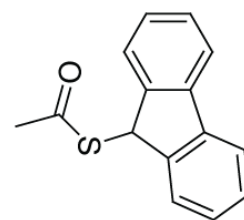

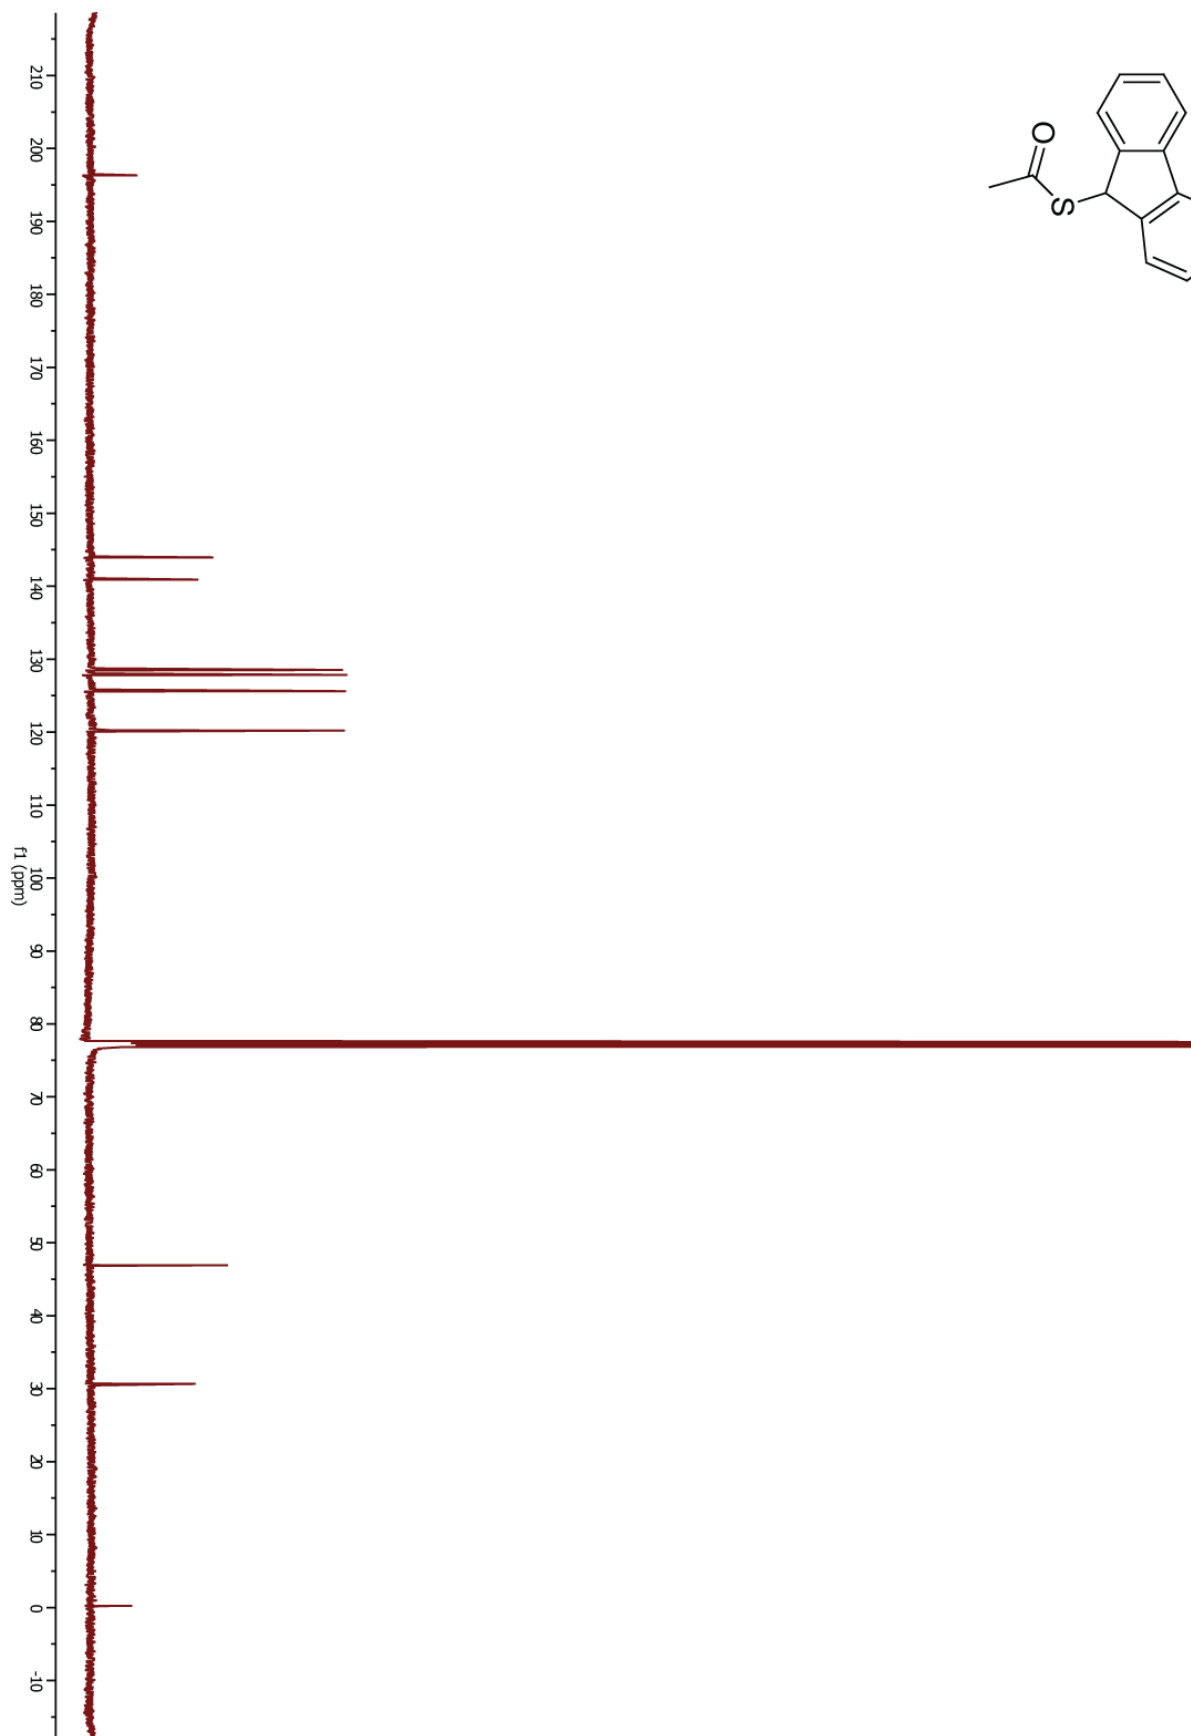

Supplement: SC-006-C4SC01768D-s001.pdf [file SC-006-C4SC01768D-s001.pdf]
